# Supplementary material for: Comparative Analysis of Metabolome and Transcriptome in Different Tissue Sites of Aquilaria sinensis (Lour.) Gilg
Source: MDPI journal article supplement (doi:10.3390/molecules29051075), 2024-02-29
Supplement: s1 [file s1]

A

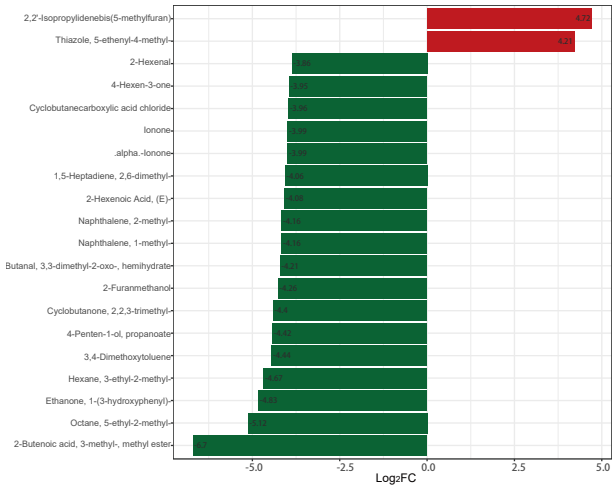

B

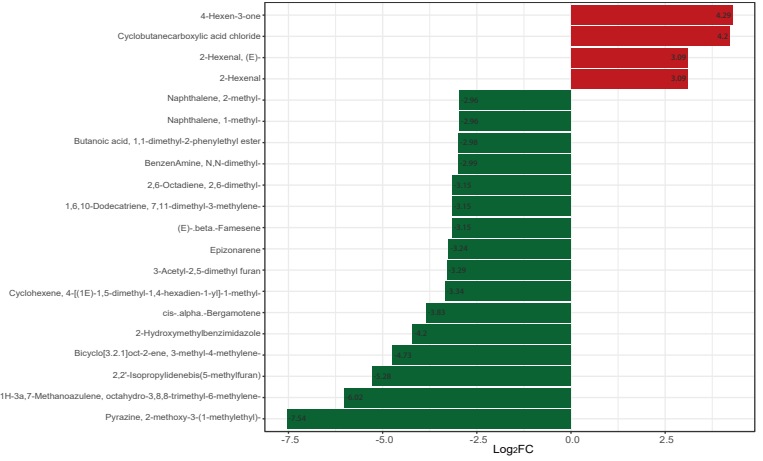

C

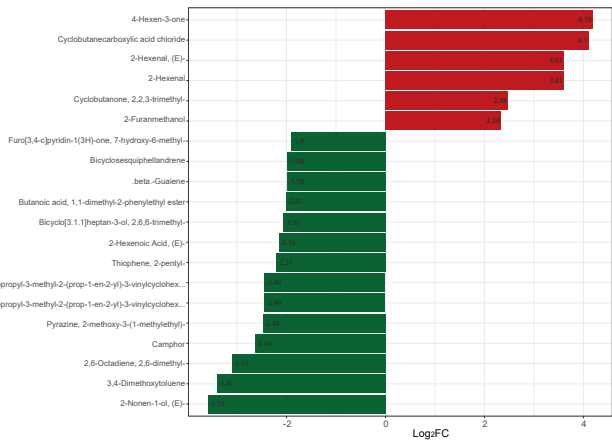

D

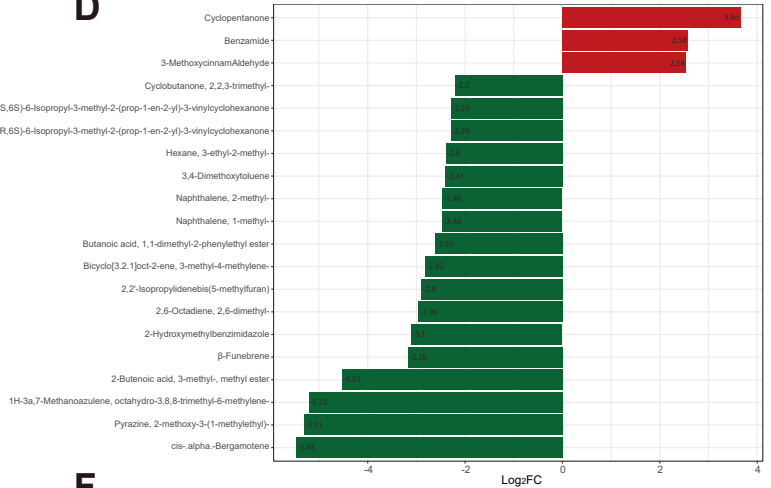

E

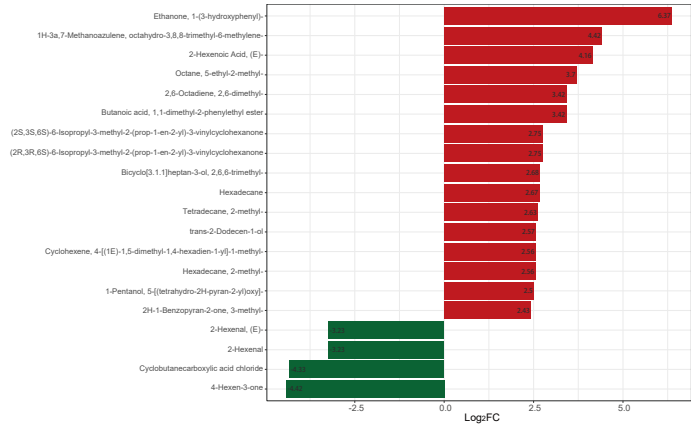

F

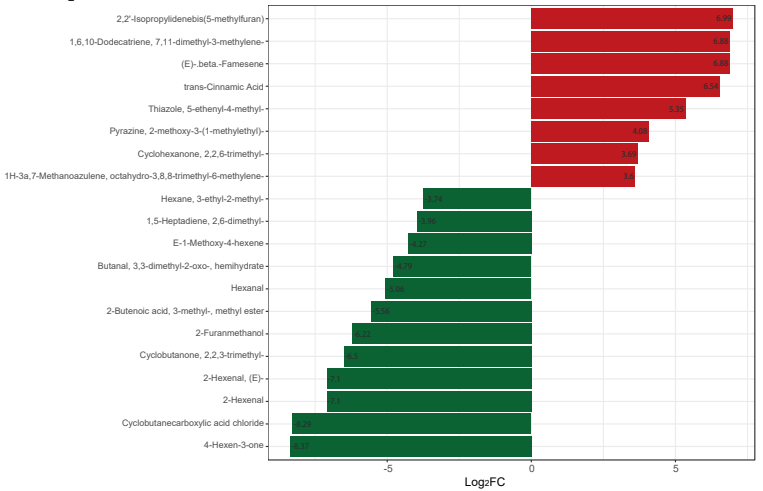

G

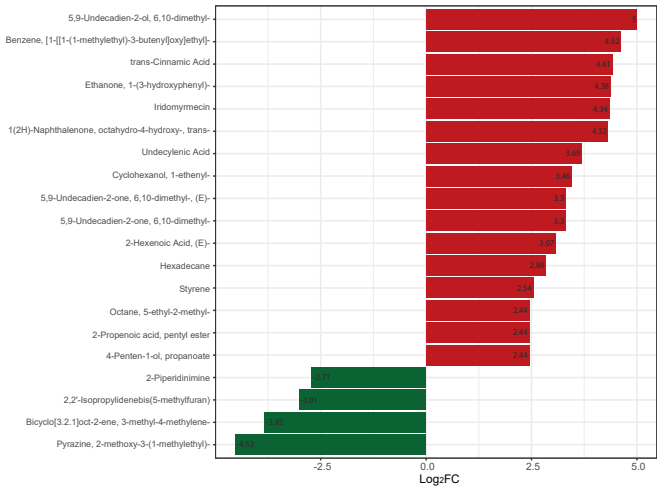

H

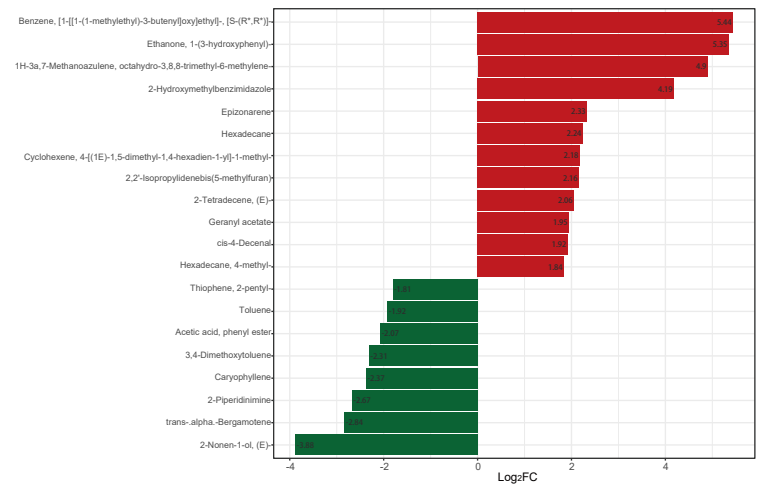

I

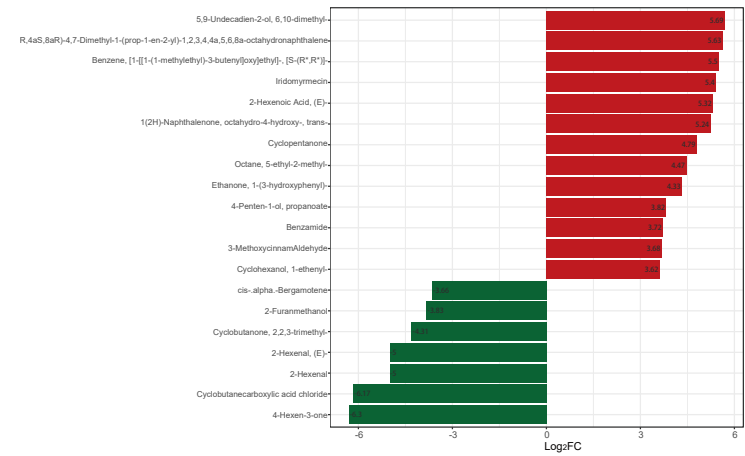

J

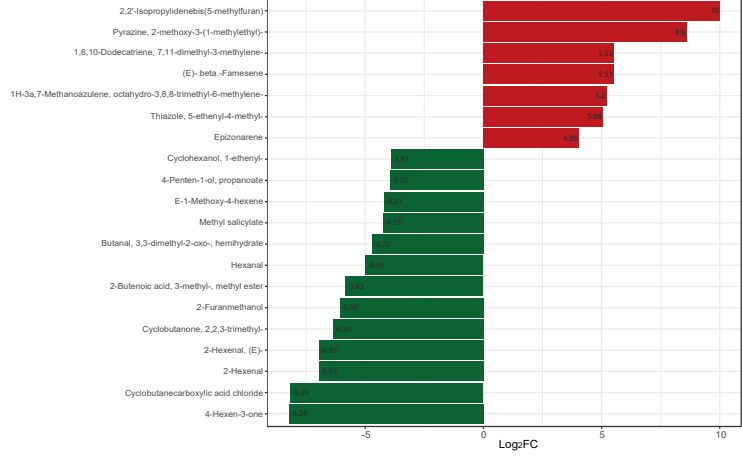

K

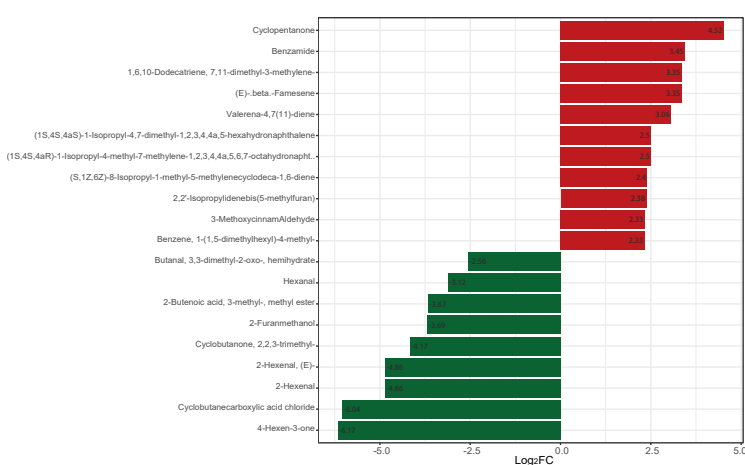

L

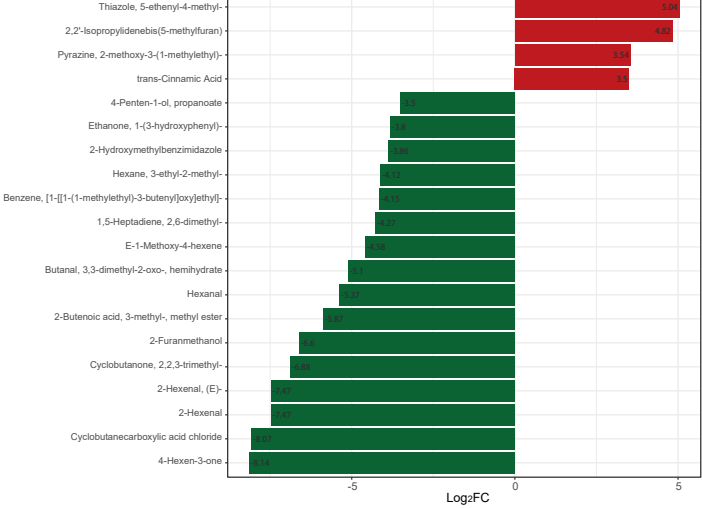

M

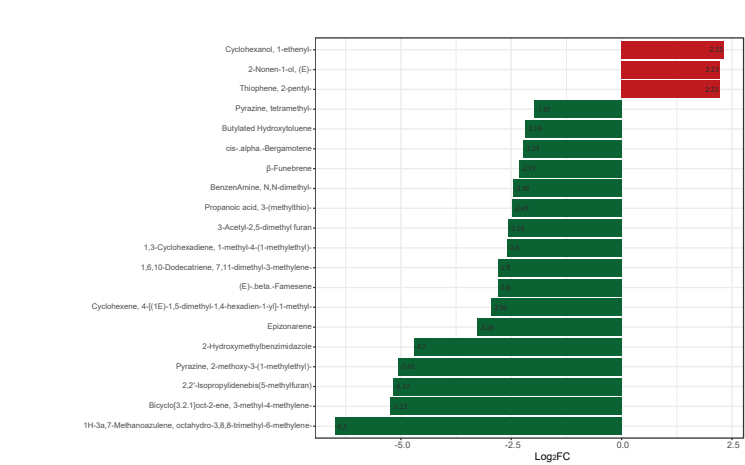

N

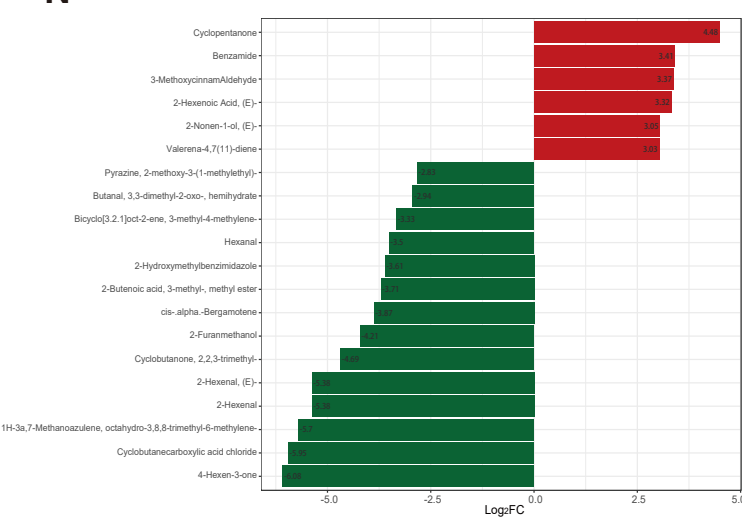

O

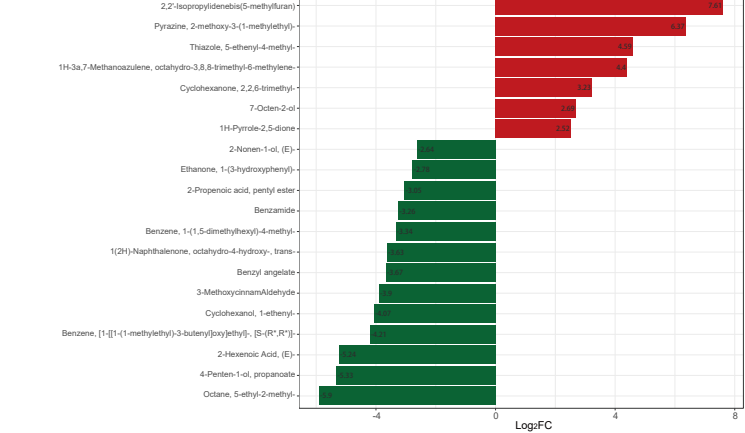

Supplementary Figure S3. Bar Chart of DAMs between each comparison group (Top 20). (A) AS-Husk\_vs\_AS-Leaf, (B) AS-Husk\_vs\_AS-Root, (C) AS-Husk\_vs\_AS-Seed, (D) AS-Husk\_vs\_AS-Stem, (E) AS-LeafCallus\_vs\_AS-Husk, (F) AS-LeafCallus\_vs\_AS-Leaf, (G) AS-LeafCallus\_vs\_AS-Root, (H) AS-LeafCallus\_vs\_AS-Seed, (I) AS-LeafCallus\_vs\_AS-Stem, (J) AS-Root\_vs\_AS-Leaf, (K) AS-Root\_vs\_AS-Stem, (L) AS-Seed\_vs\_AS-Leaf, (M) AS-Seed\_vs\_AS-Root, (N) AS-Seed\_vs\_AS-Stem, (O) AS-Stem\_vs\_AS-Leaf.
