# Supplementary material for: Comparative Analysis of Metabolome and Transcriptome in Different Tissue Sites of Aquilaria sinensis (Lour.) Gilg
Source: MDPI journal article supplement (doi:10.3390/molecules29051075), 2024-02-29
Supplement: s1 [file s1]

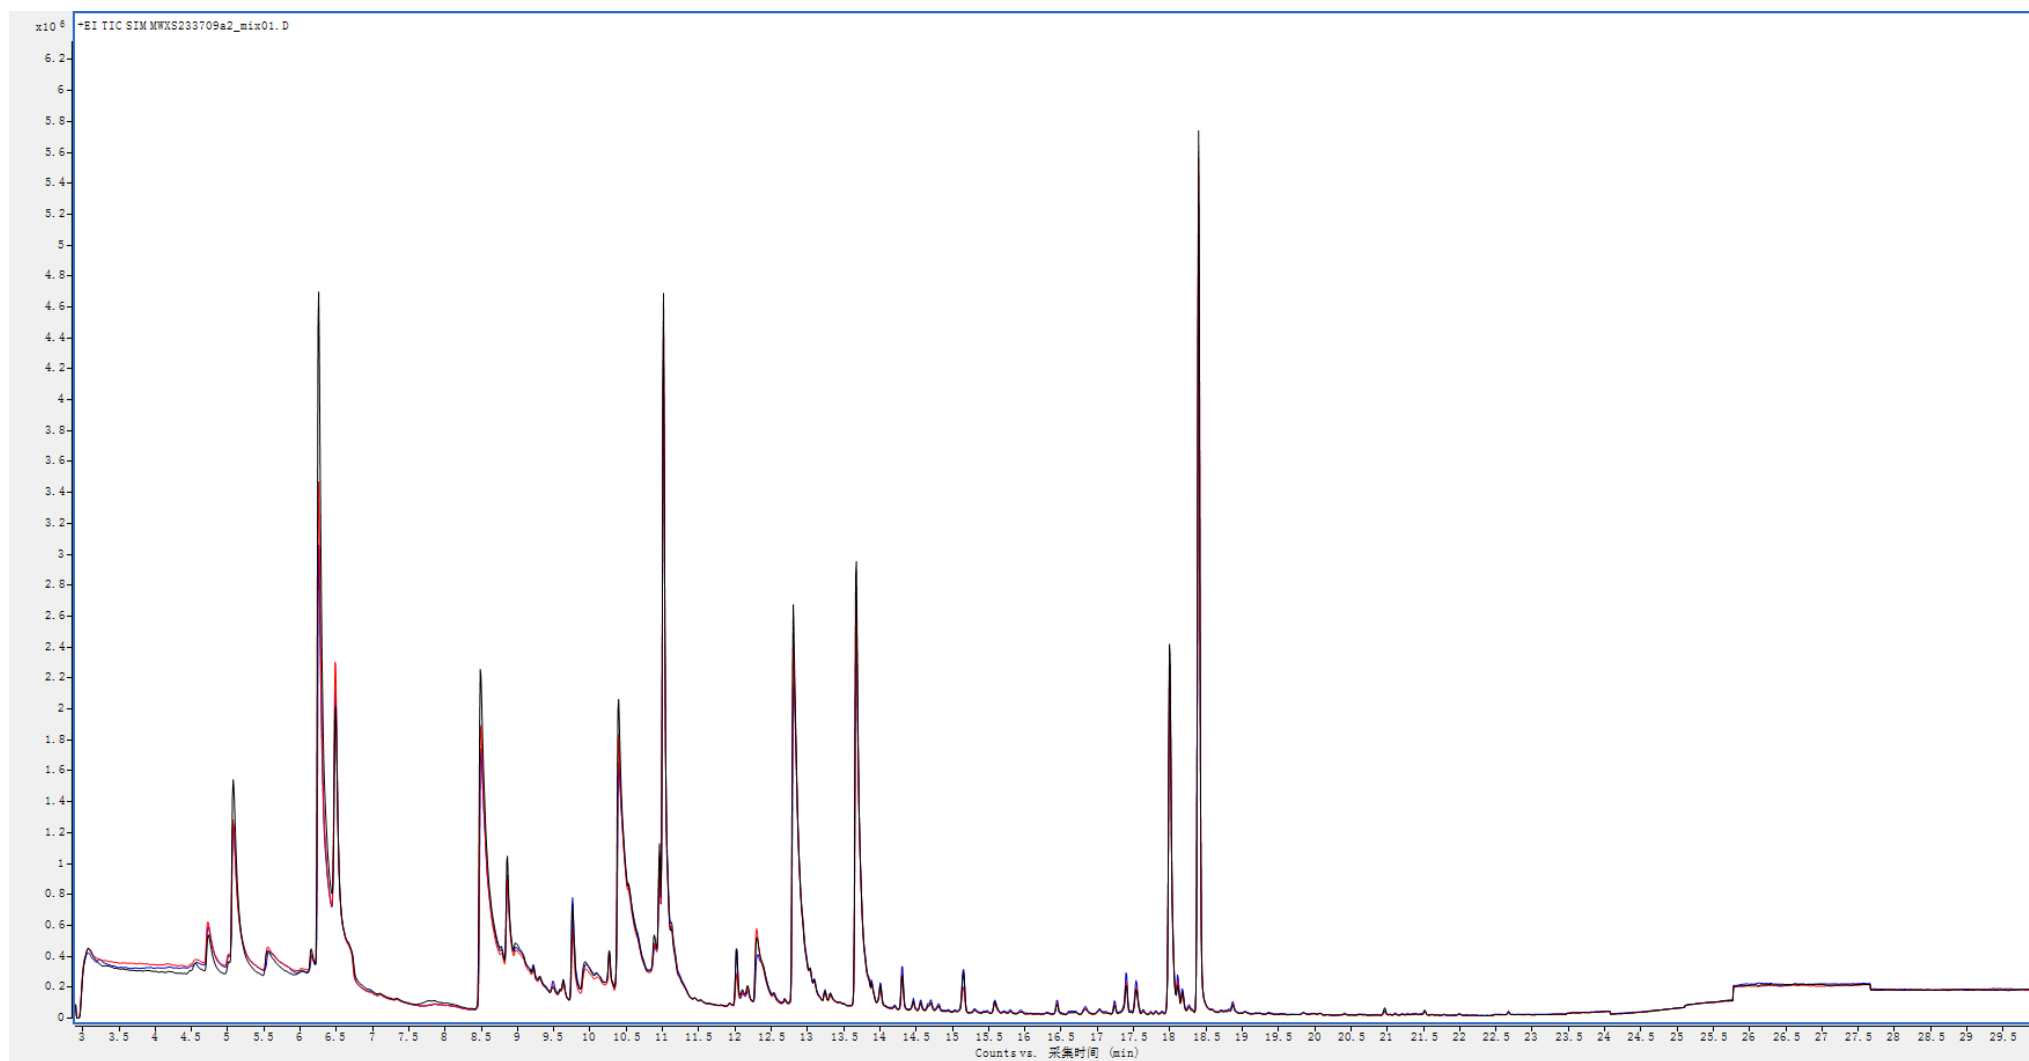

Supplementary Figure S1. The total ion current (TIC) of QC samples involves superimposing the ion flow diagram depicted in the figure.
