# Supplementary material for: Comparative Analysis of Metabolome and Transcriptome in Different Tissue Sites of Aquilaria sinensis (Lour.) Gilg
Source: MDPI journal article supplement (doi:10.3390/molecules29051075), 2024-02-29
Supplement: s1 [file s1]

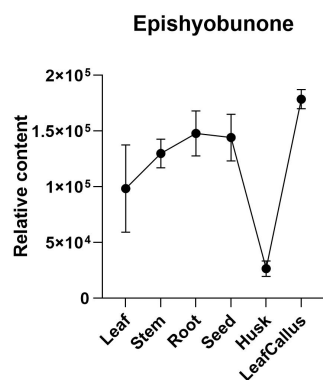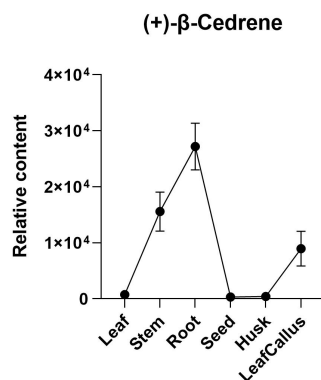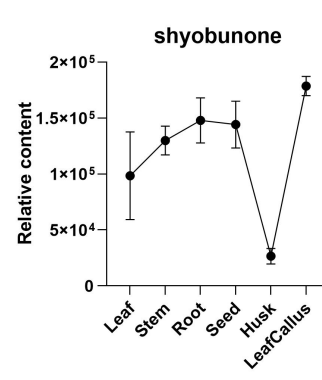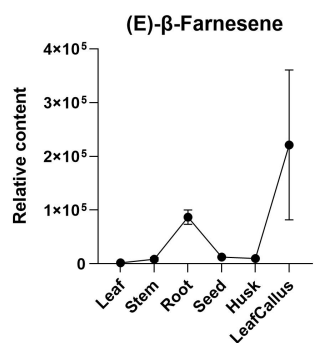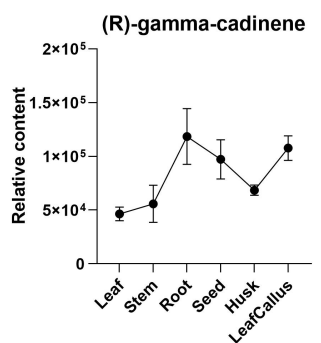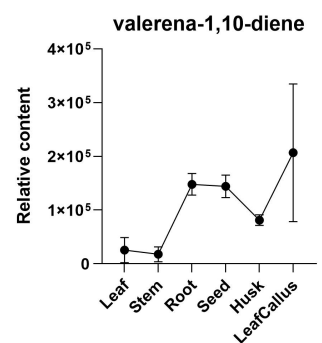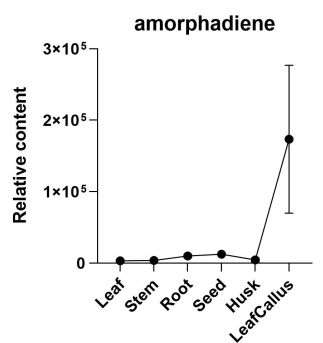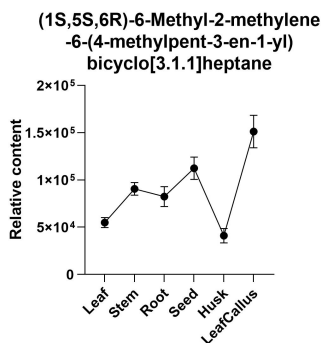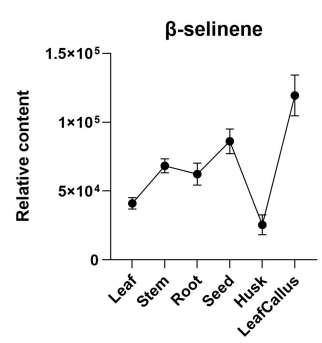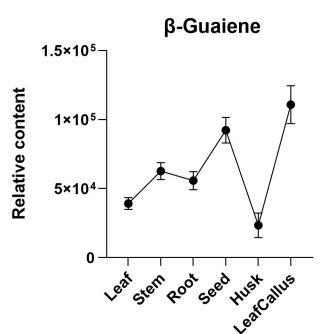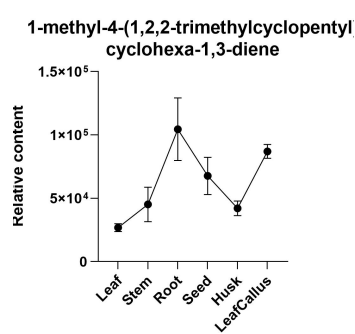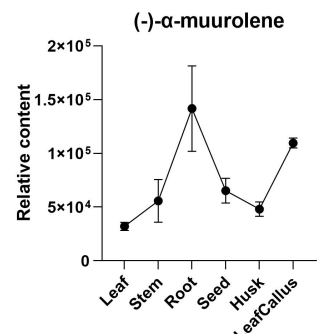

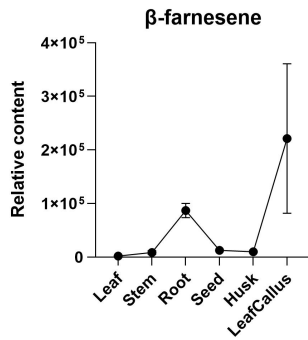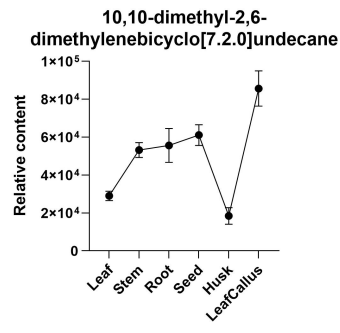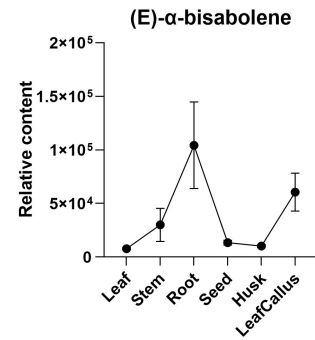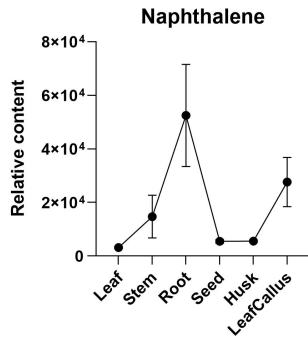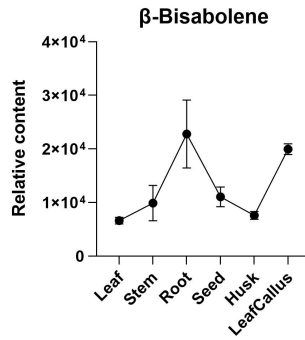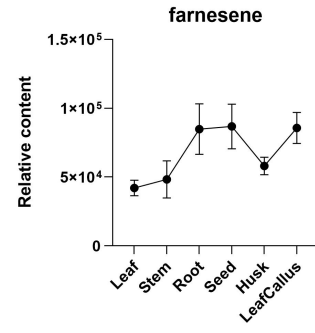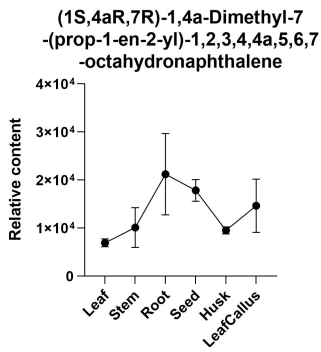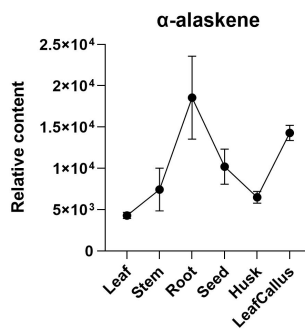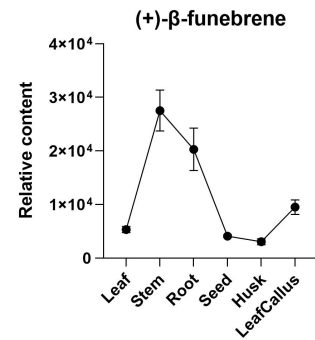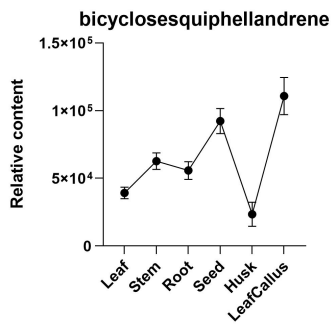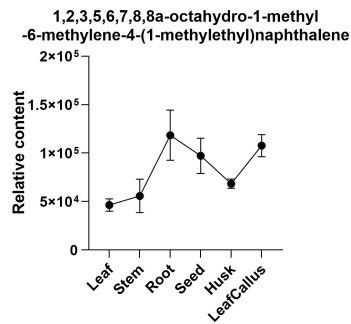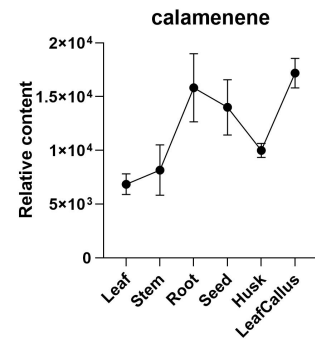

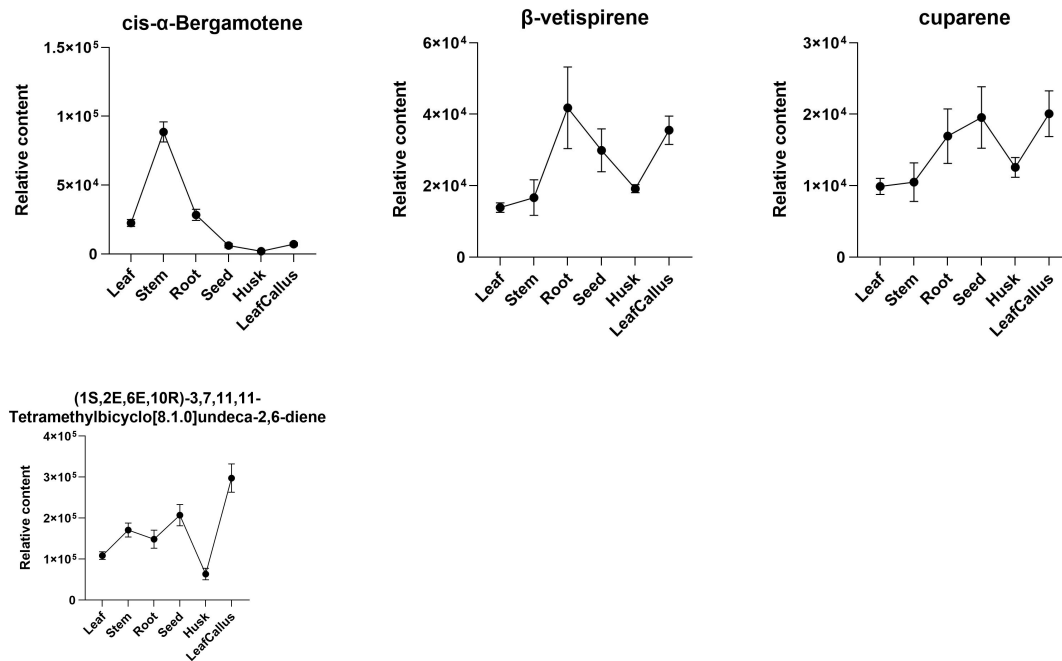

Supplementary Figure S5. Relative content of sesquiterpenes in six different tissue sites except for sesquiterpenes shown in Figure 5C. Data are expressed as mean  $\pm$  standard error of the mean (SEM), n=6.
