# Supplementary material for: Comparative Analysis of Metabolome and Transcriptome in Different Tissue Sites of Aquilaria sinensis (Lour.) Gilg
Source: MDPI journal article supplement (doi:10.3390/molecules29051075), 2024-02-29
Supplement: s1 [file s1]

**A**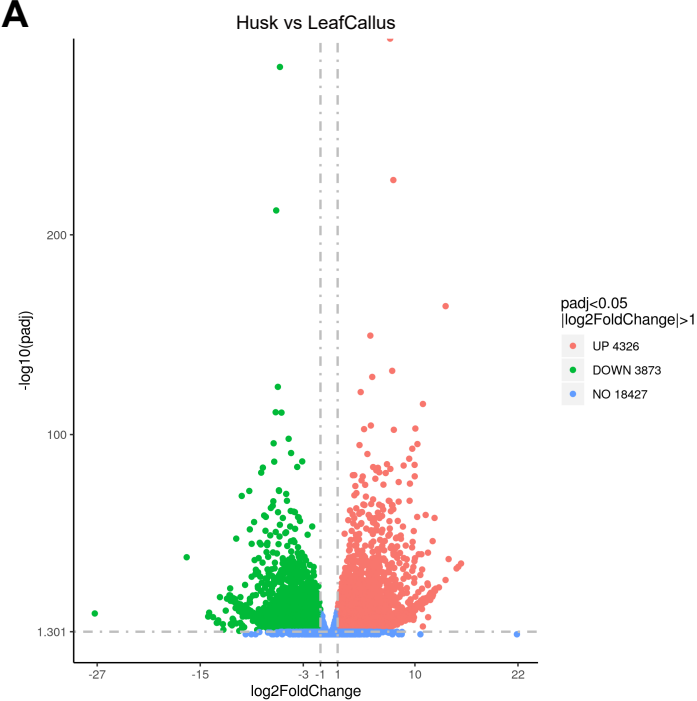**B**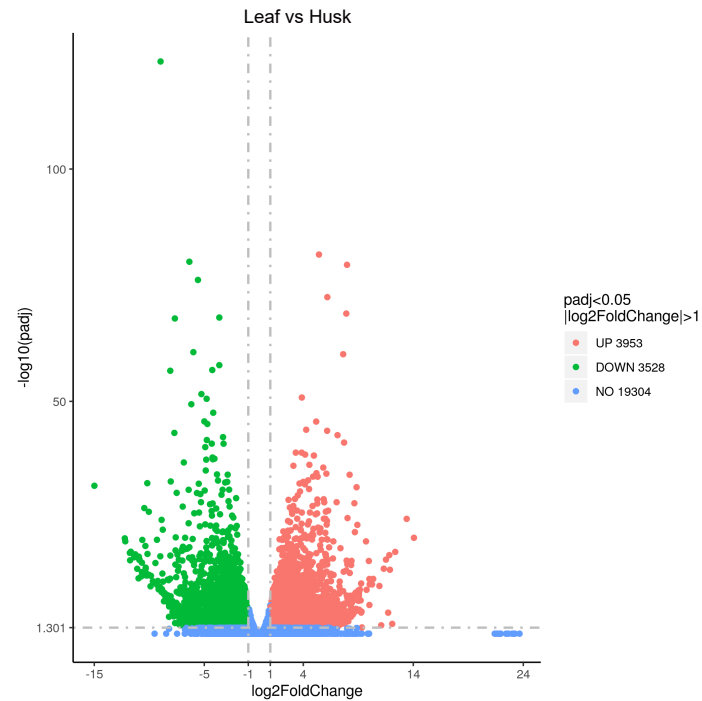**C**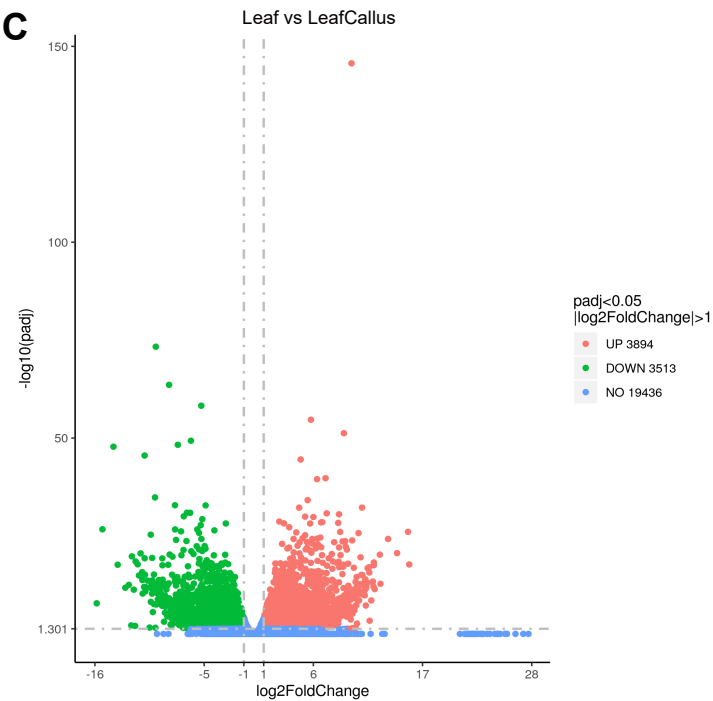**D**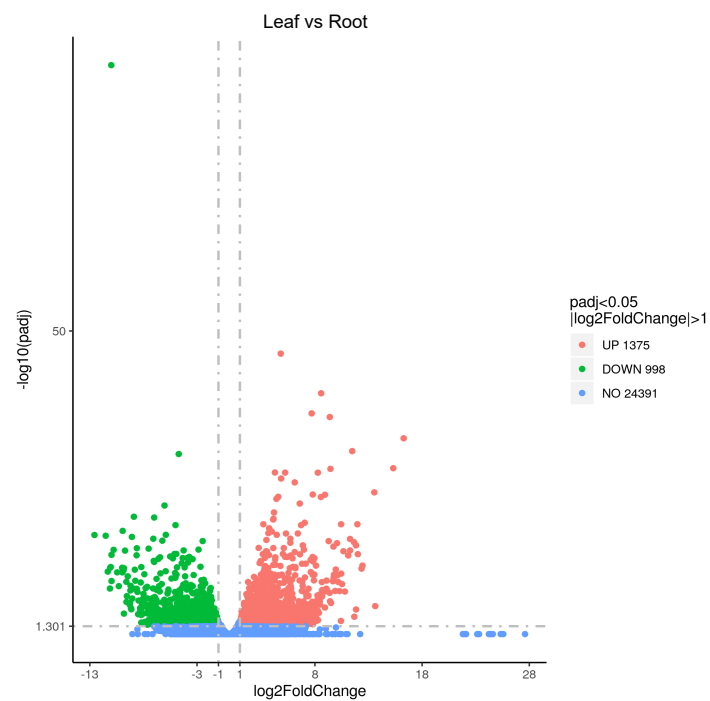**E**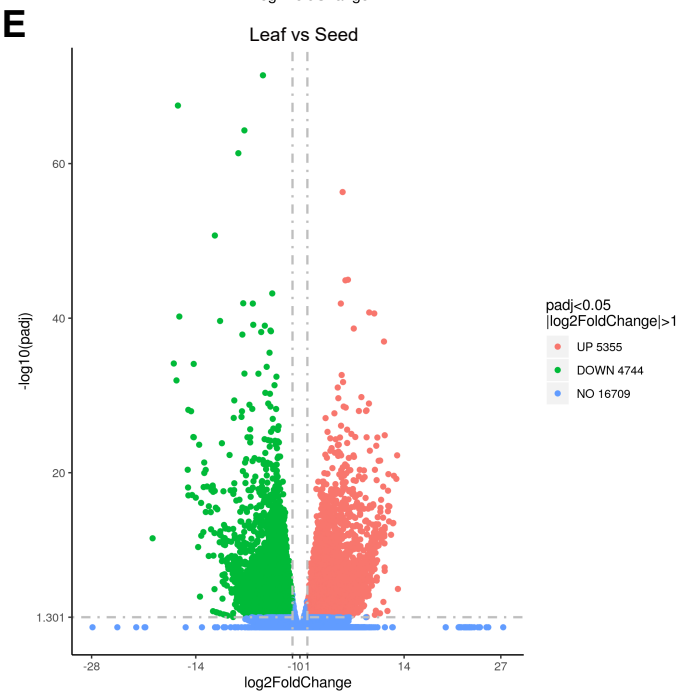**F**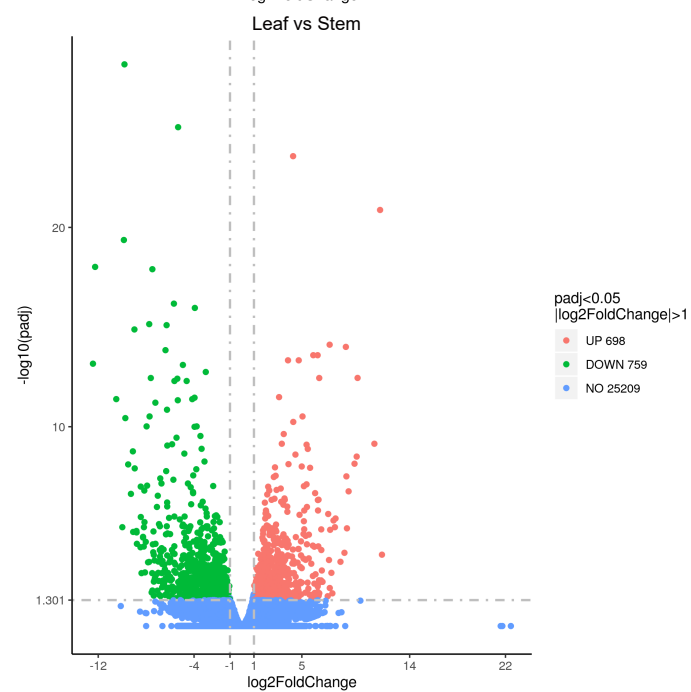

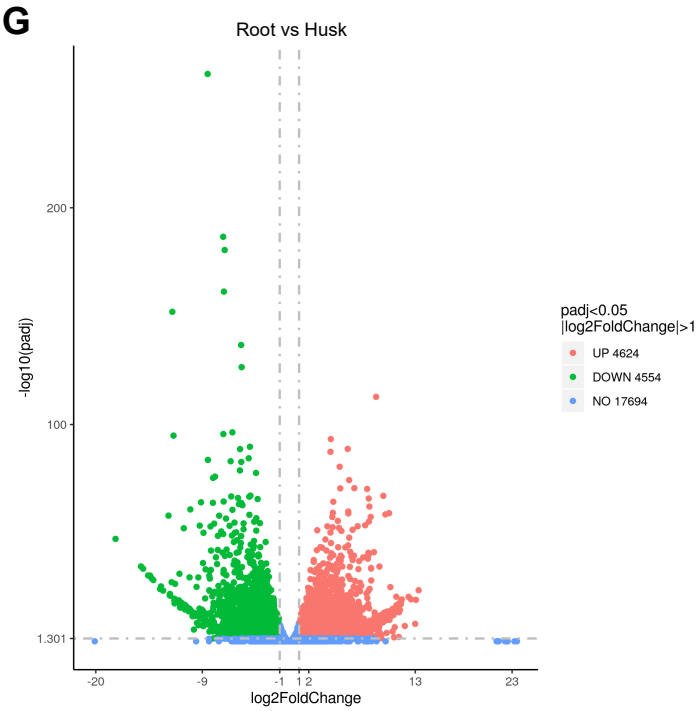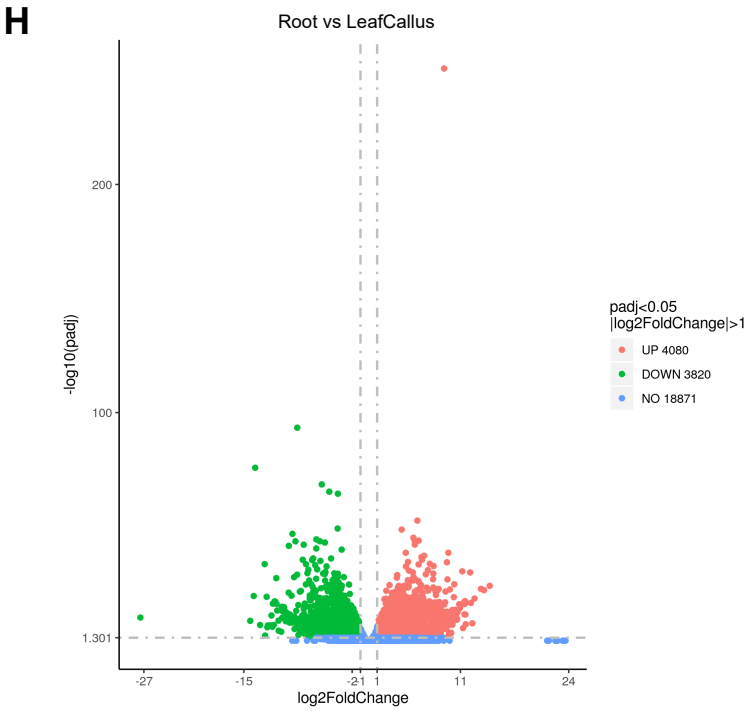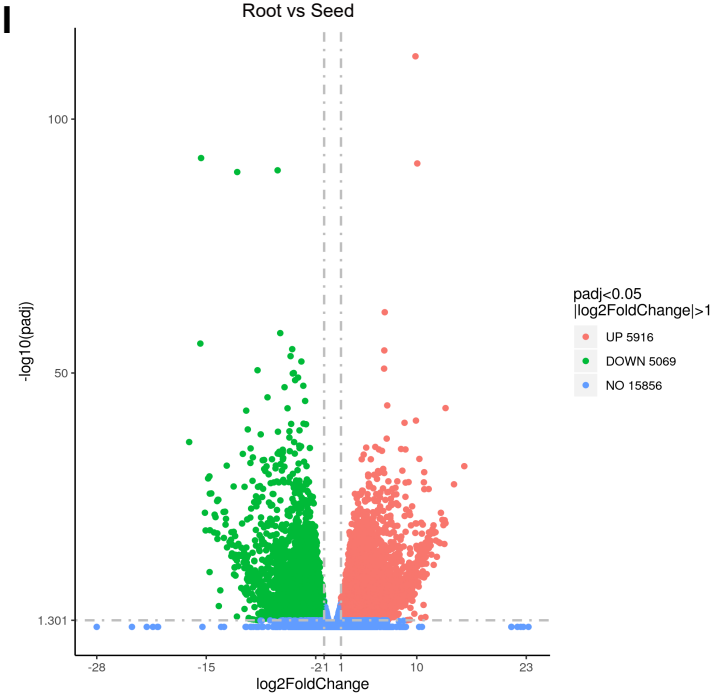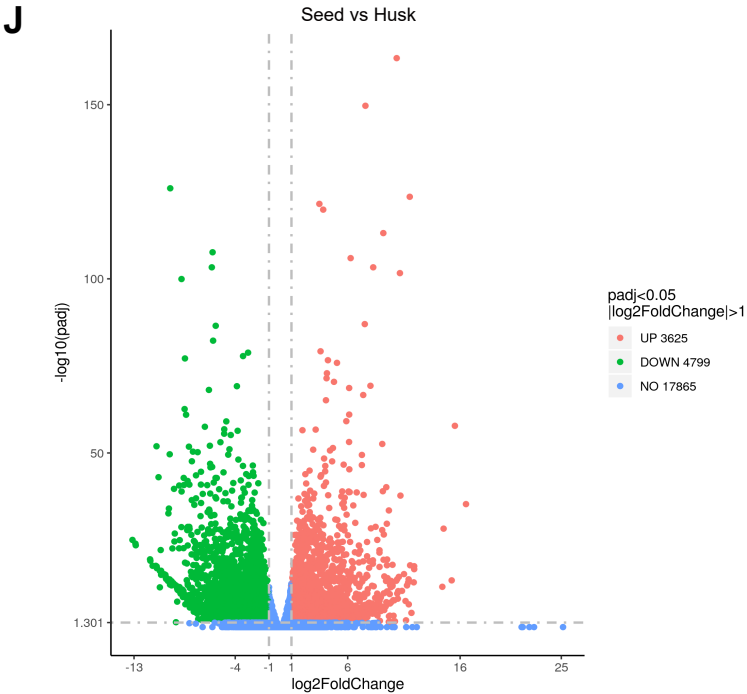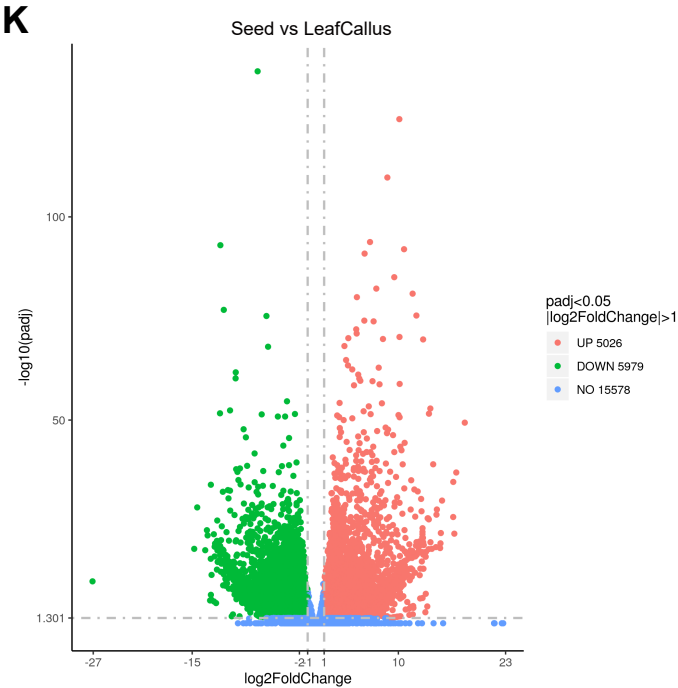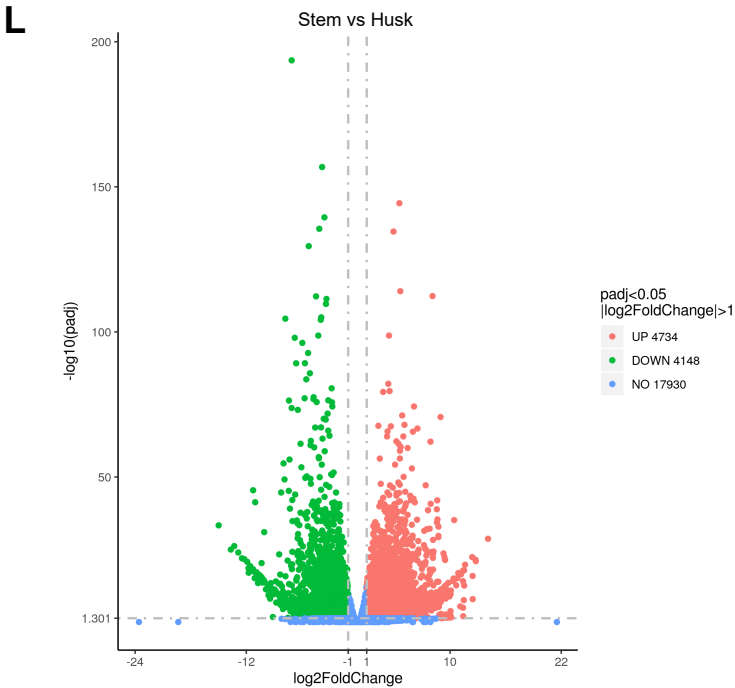

**M**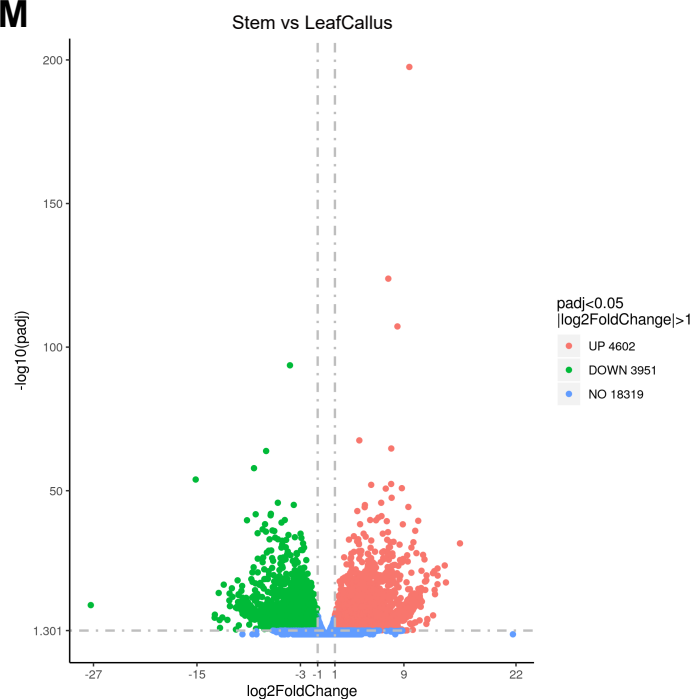**N**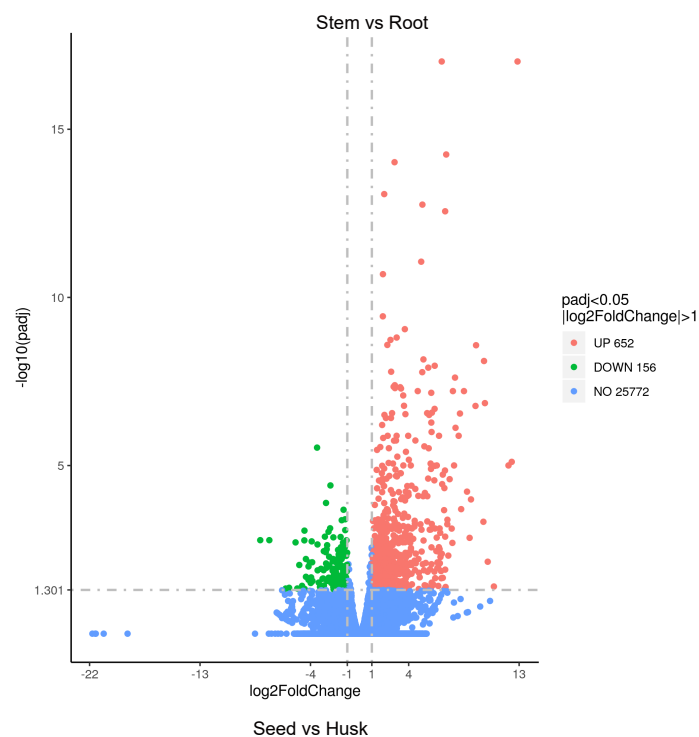**O**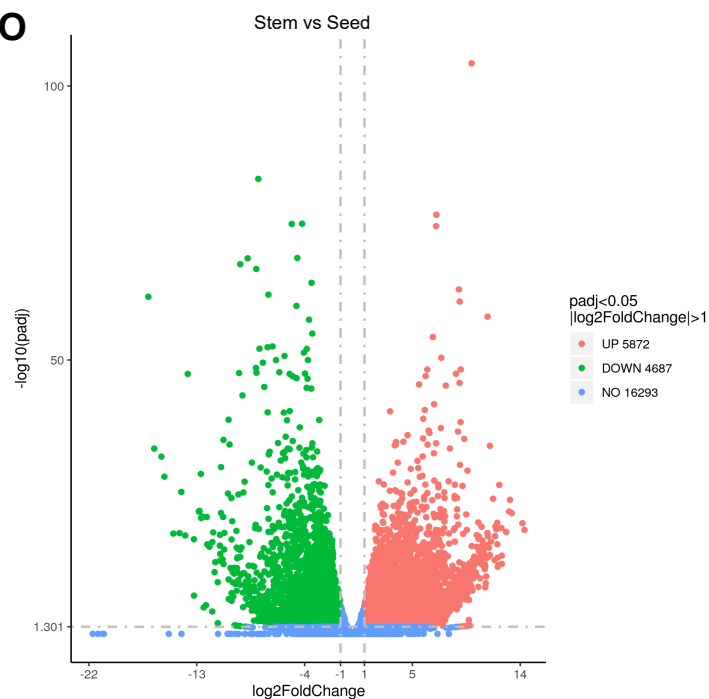

Supplementary Figure S6. Volcano plot of differentially expressed genes among six different tissue sites. (A) HuskvsLeafCallus, (B) LeafvsHusk, (C) LeafvsLeafCallus, (D) LeafvsRoot, (E) LeafvsSeed, (F) Leafvs Stem, (G) Root vsHusk, (H) RootvsLeafCallus, (I) RootvsSeed, (J) SeedvsHusk, (K) Seed vs LeafCallus, (L) Stem vsHusk, (M) StemvsLeafCallus, (N) StemvsRoot, (O) StemvsSeed. The representation of each dot corresponds to a specific gene, with red dots indicating up-regulated differentially expressed genes, green dots representing down-regulated differentially expressed genes, and blue dots denoting genes that were detected but did not exhibit significant differences.
