# Supplementary material for: Comparative Analysis of Metabolome and Transcriptome in Different Tissue Sites of Aquilaria sinensis (Lour.) Gilg
Source: MDPI journal article supplement (doi:10.3390/molecules29051075), 2024-02-29
Supplement: s1 [file s1]

**A**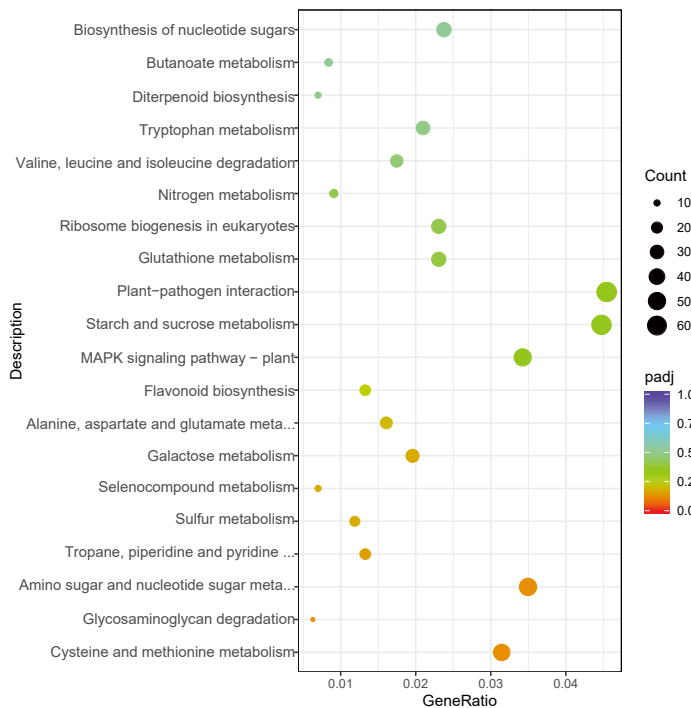**B**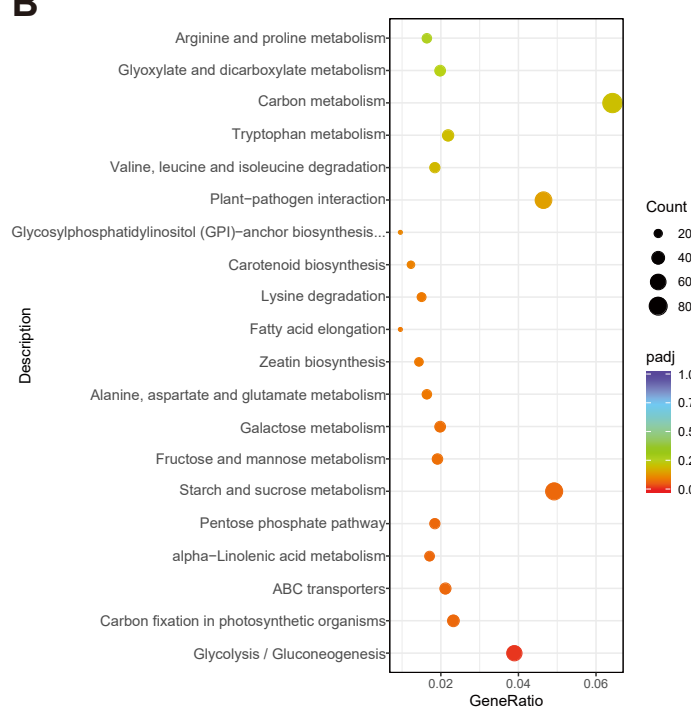**C**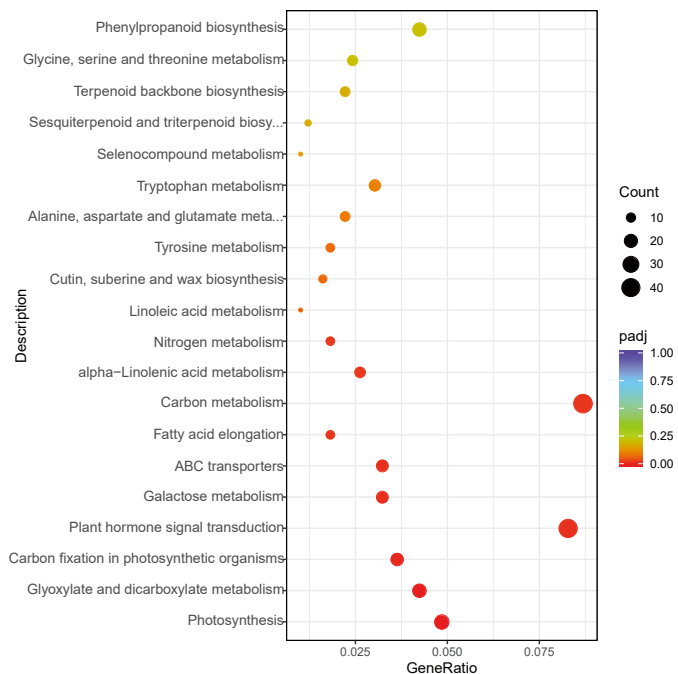**D**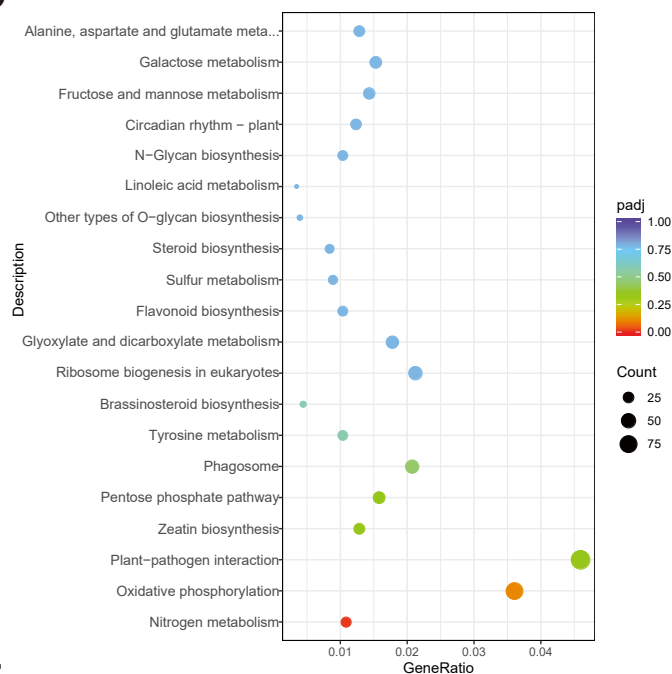**E**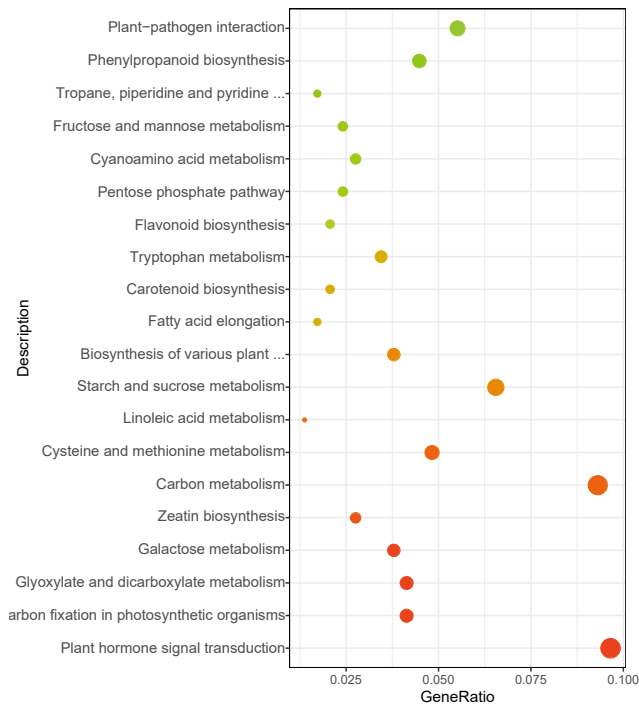**F**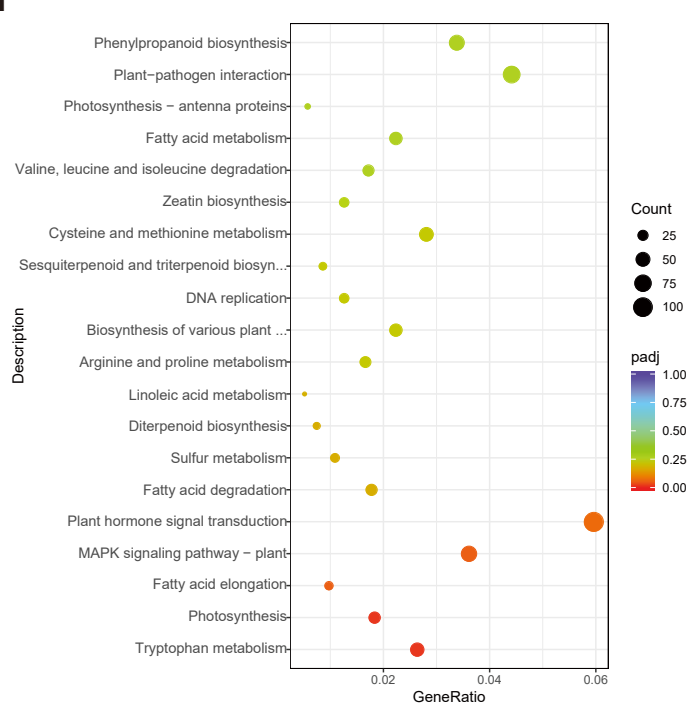

G

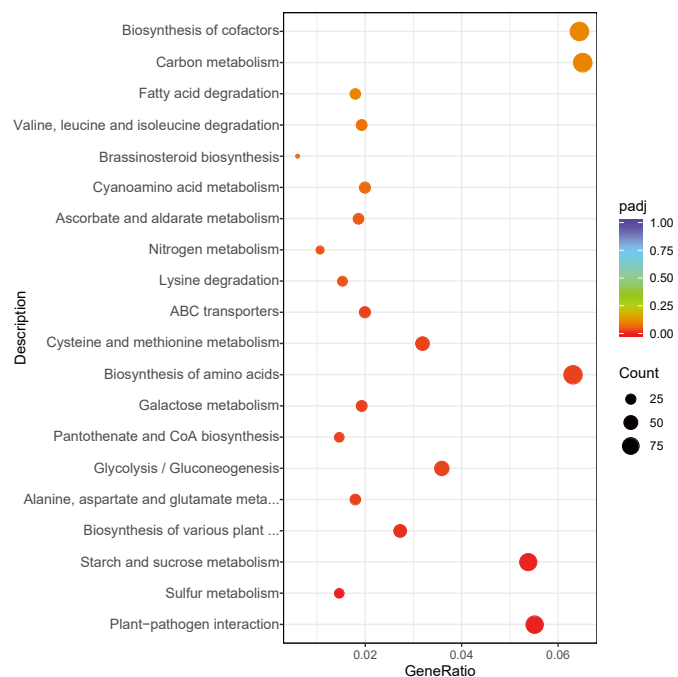

H

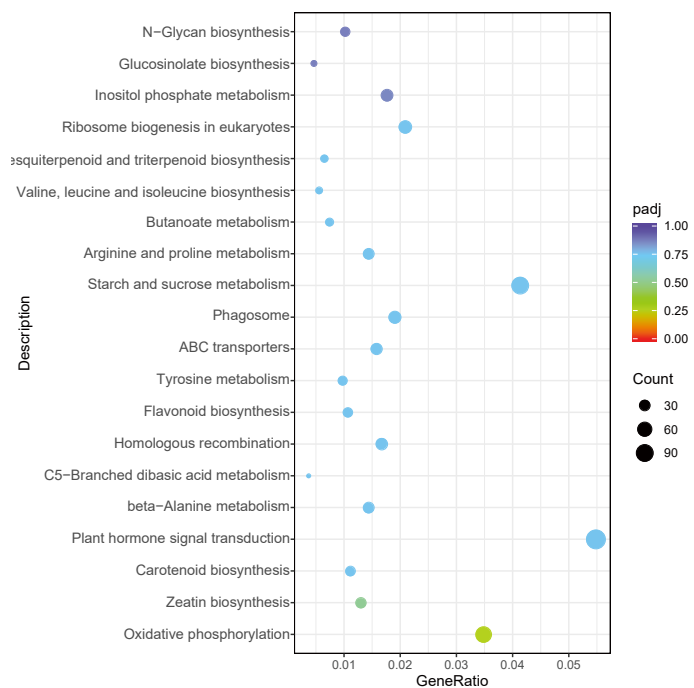

I

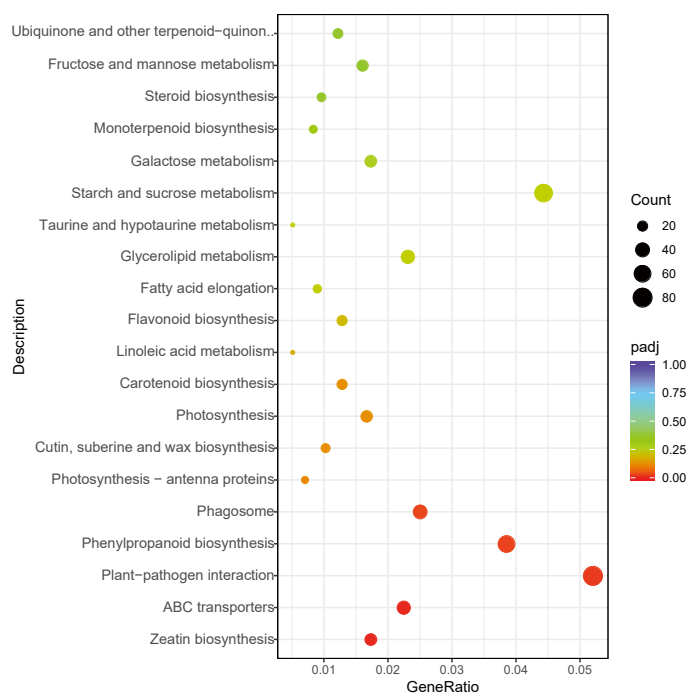

J

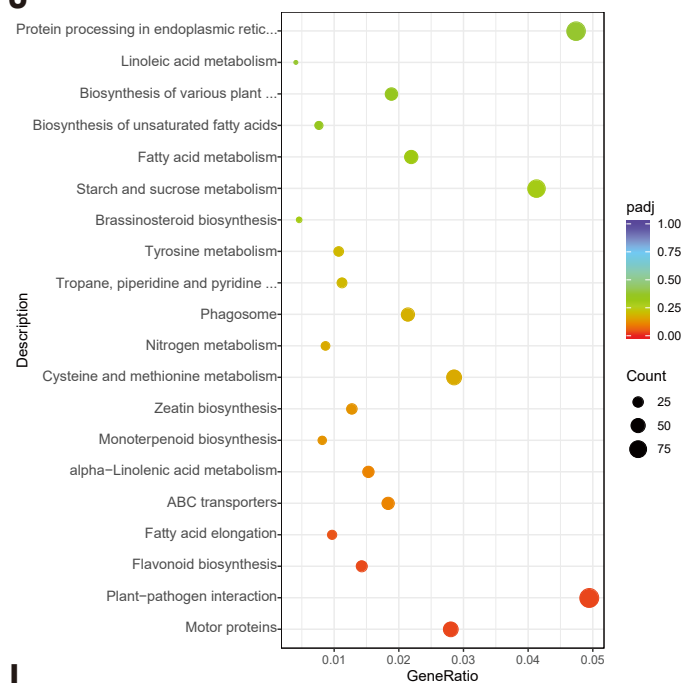

K

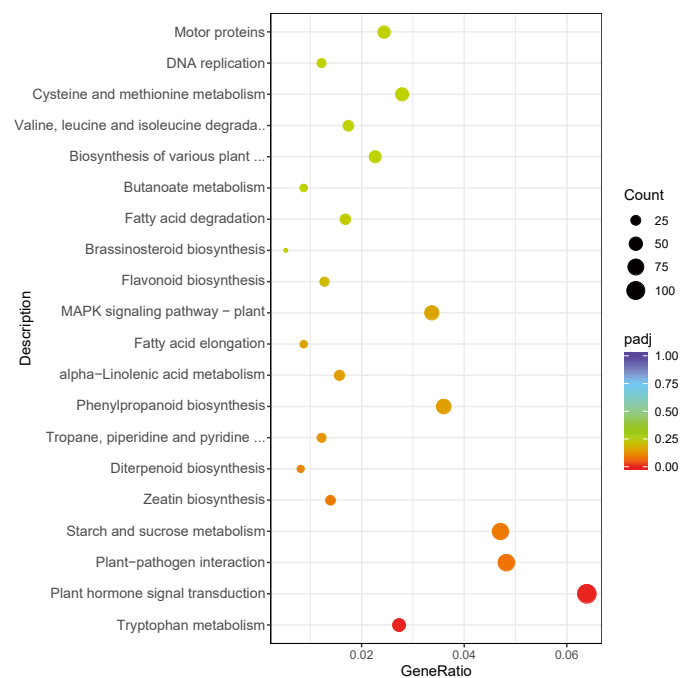

L

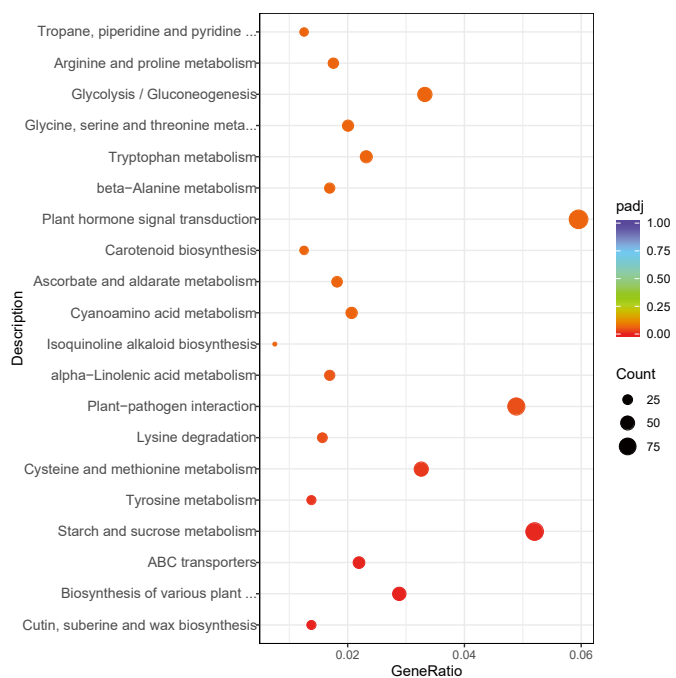

M

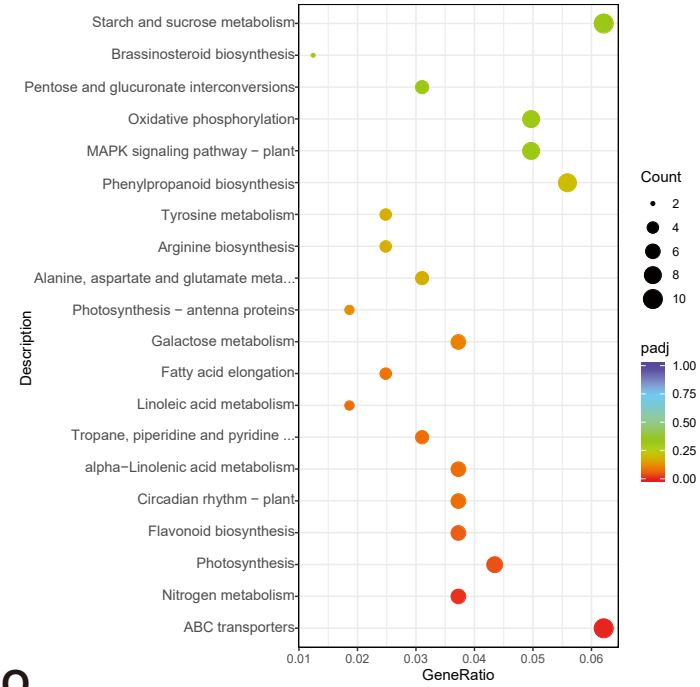

N

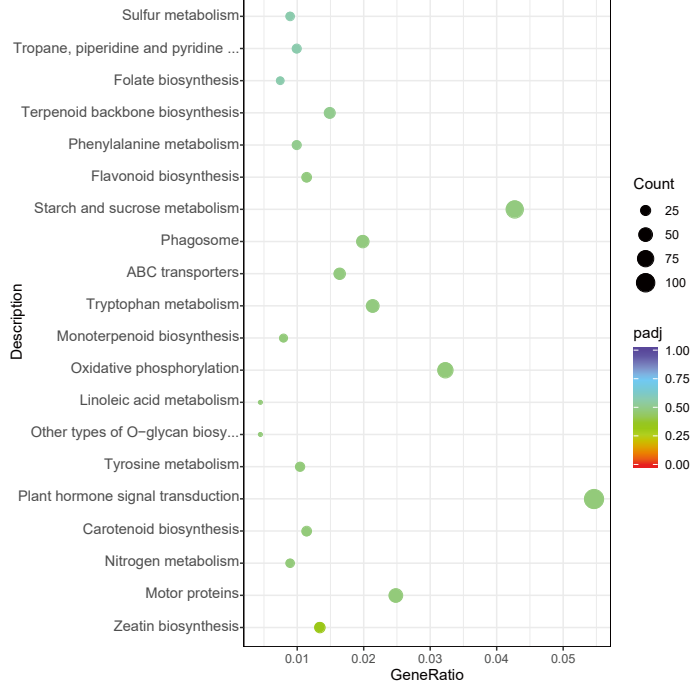

O

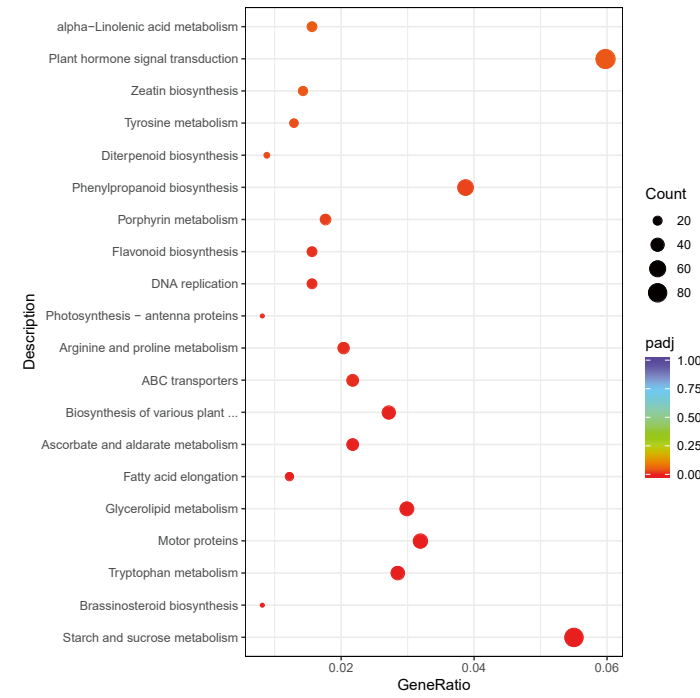

Supplementary Figure S8. Enriched KEGG pathway of DEGs between different control groups. (A) LeafvsHusk, (B) LeafvsLeafCallus, (C) LeafvsRoot, (D) LeafvsSeed, (E) LeafvsStem, (F) Root vsHusk, (G) RootvsLeafCallus, (H) RootvsSeed, (I) SeedvsHusk, (J) SeedvsLeafCallus, (K) Stem vsHusk, (L) StemvsLeafCallus, (M) StemvsRoot, (N) StemvsSeed, (O) HuskvsLeafCallus.
