# Supplementary material for: Comparative Analysis of Metabolome and Transcriptome in Different Tissue Sites of Aquilaria sinensis (Lour.) Gilg
Source: MDPI journal article supplement (doi:10.3390/molecules29051075), 2024-02-29
Supplement: s1 [file s1]

A

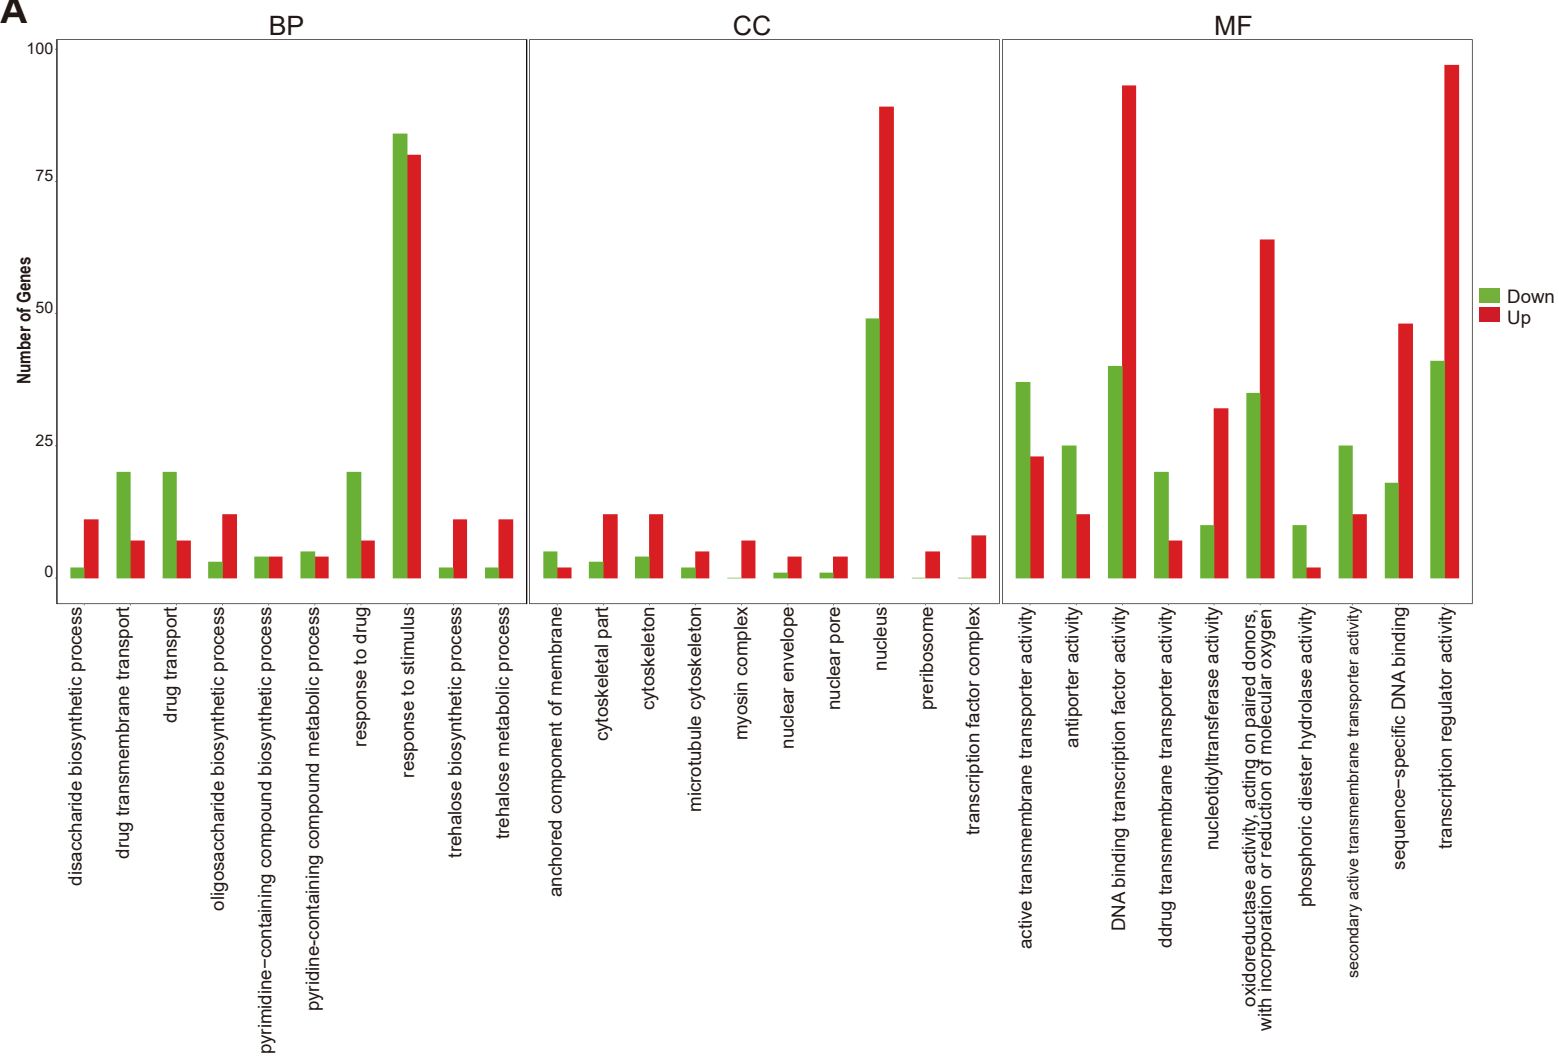

B

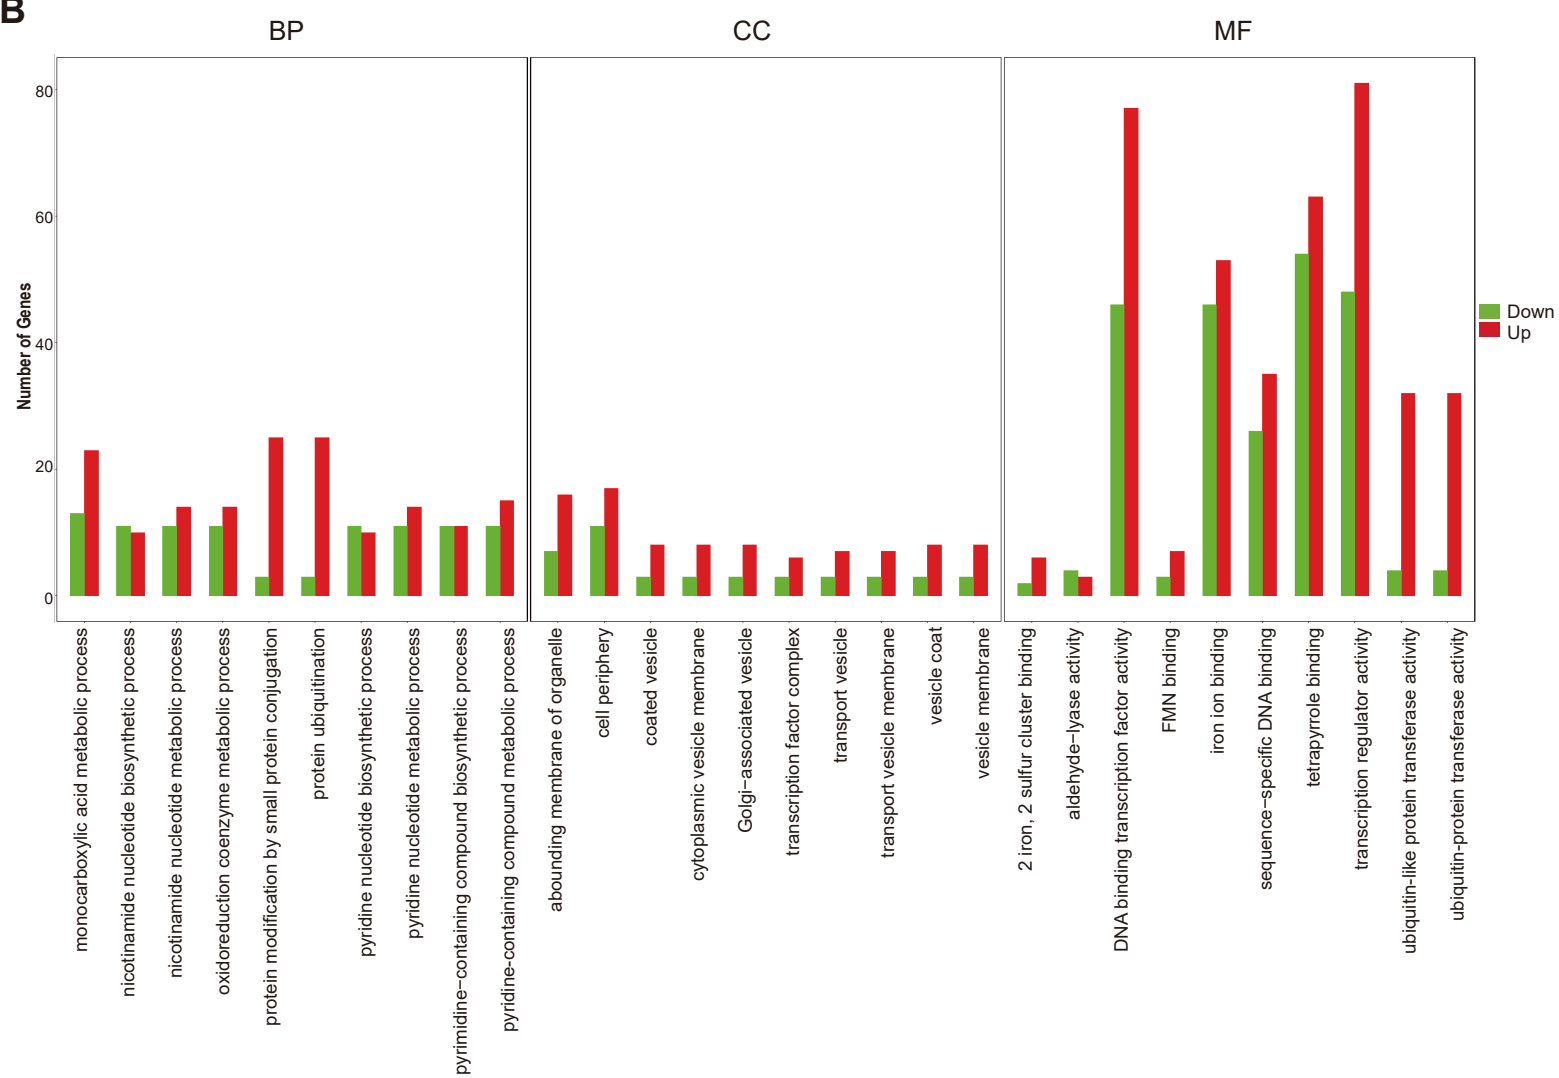

**C**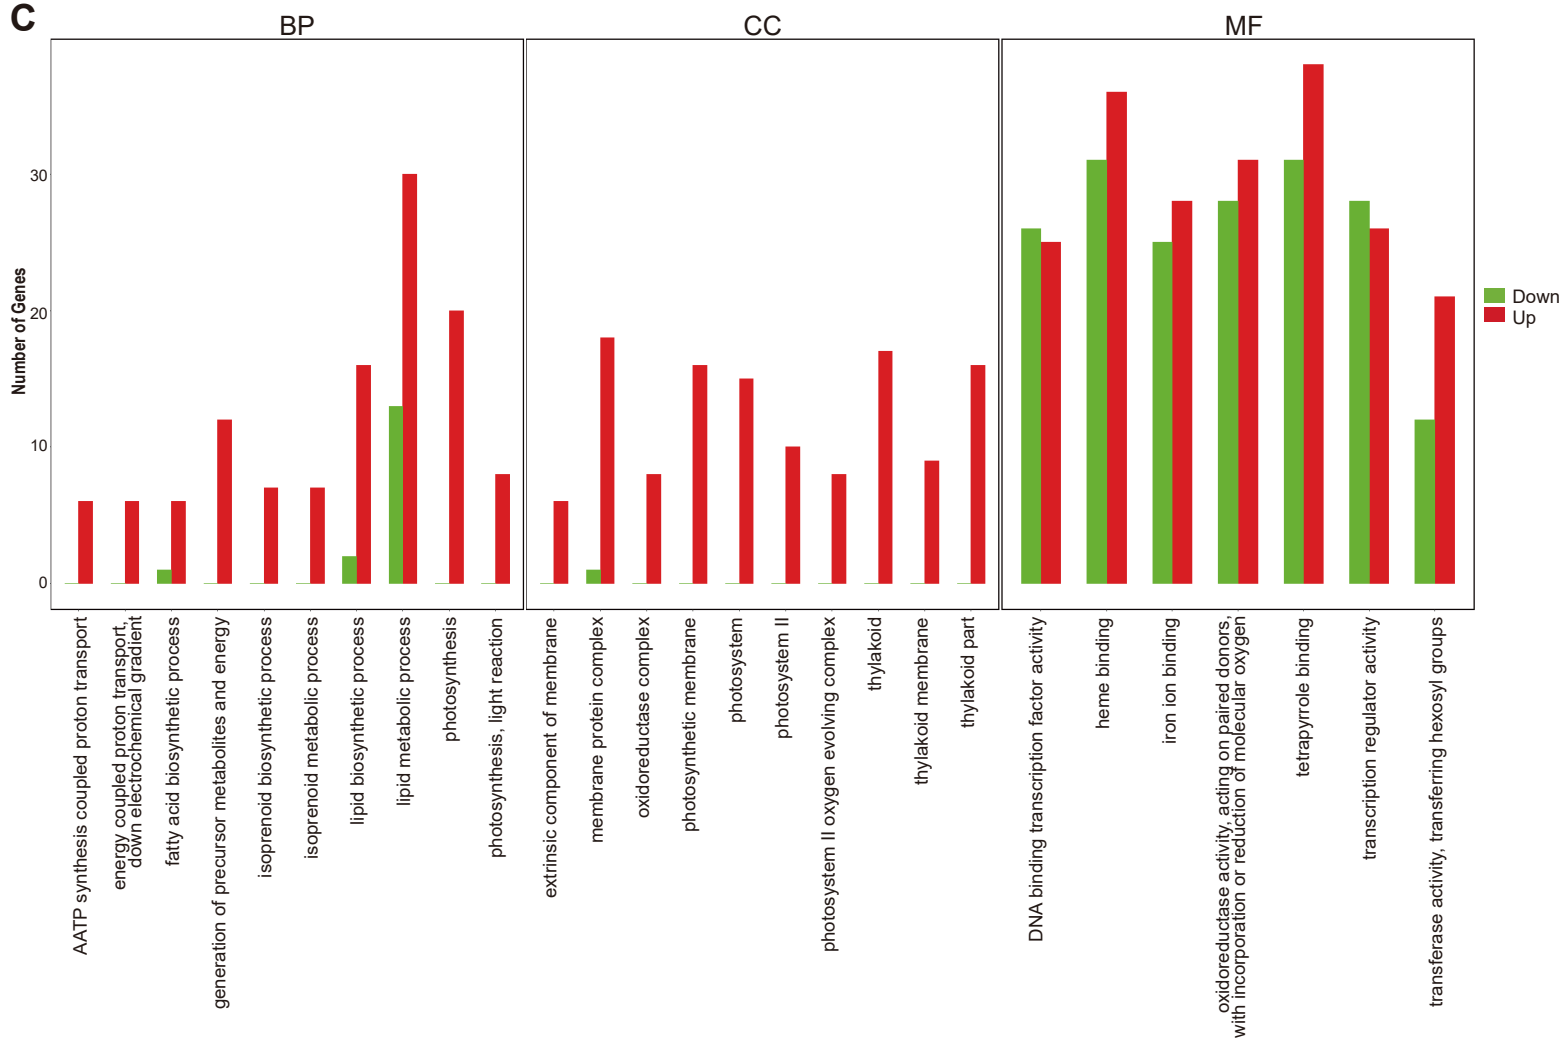**D**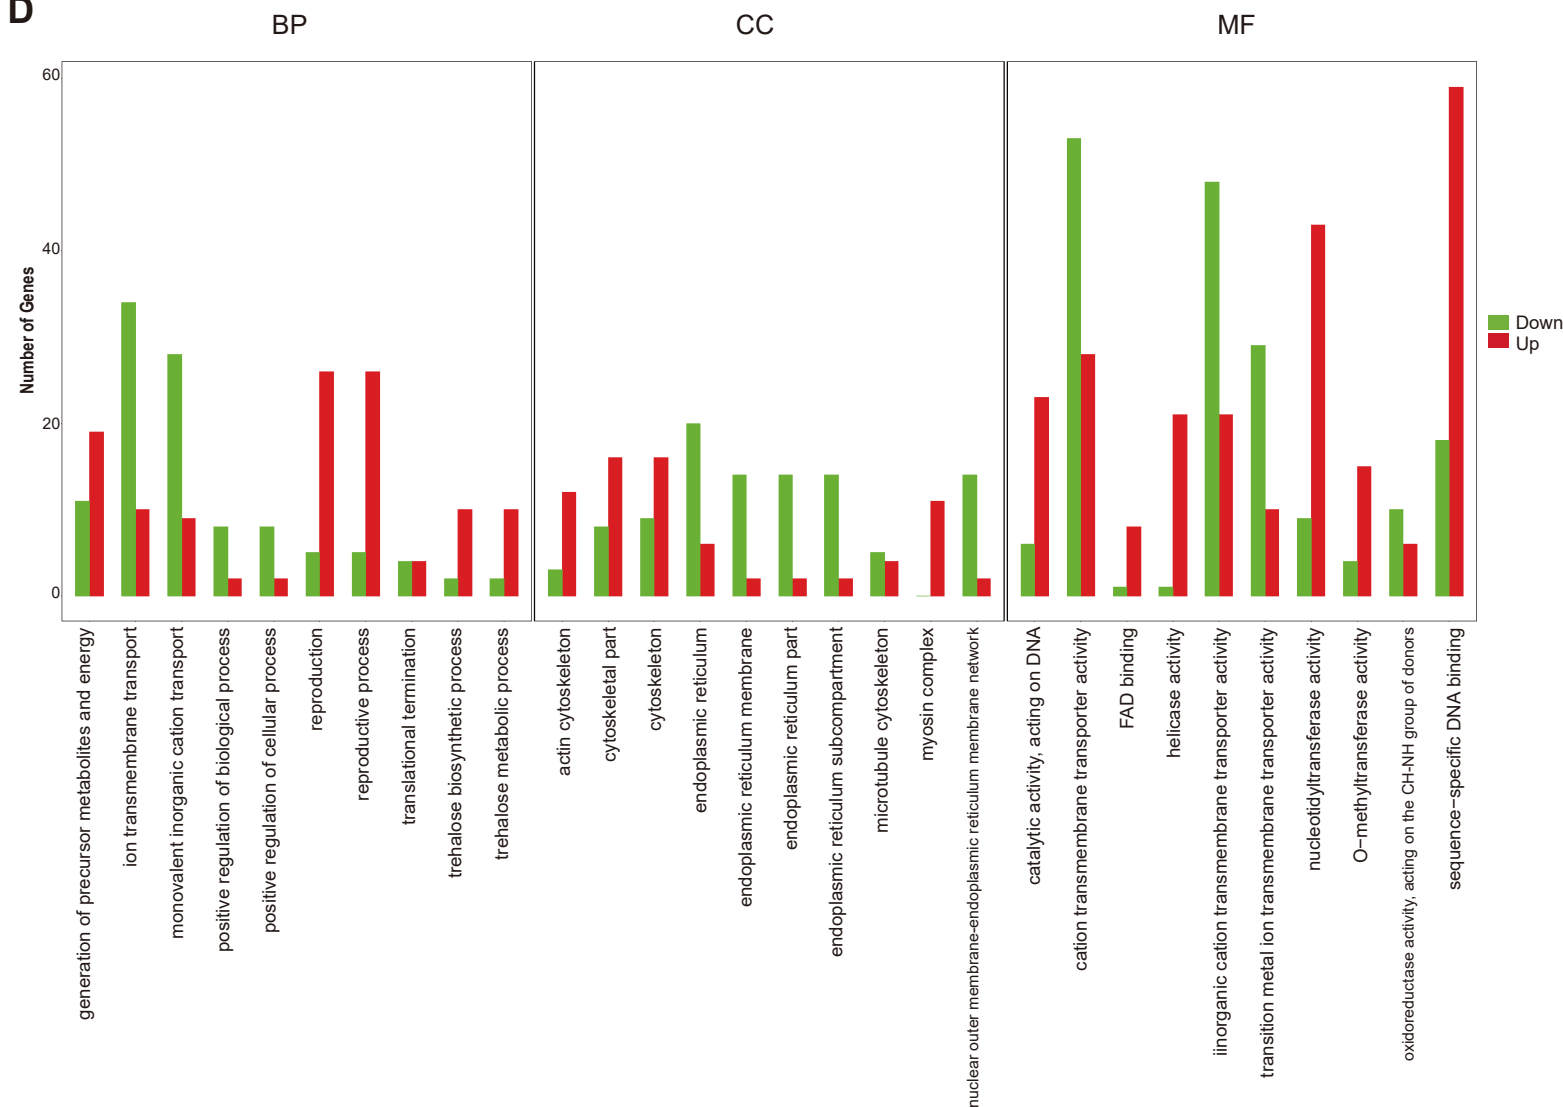

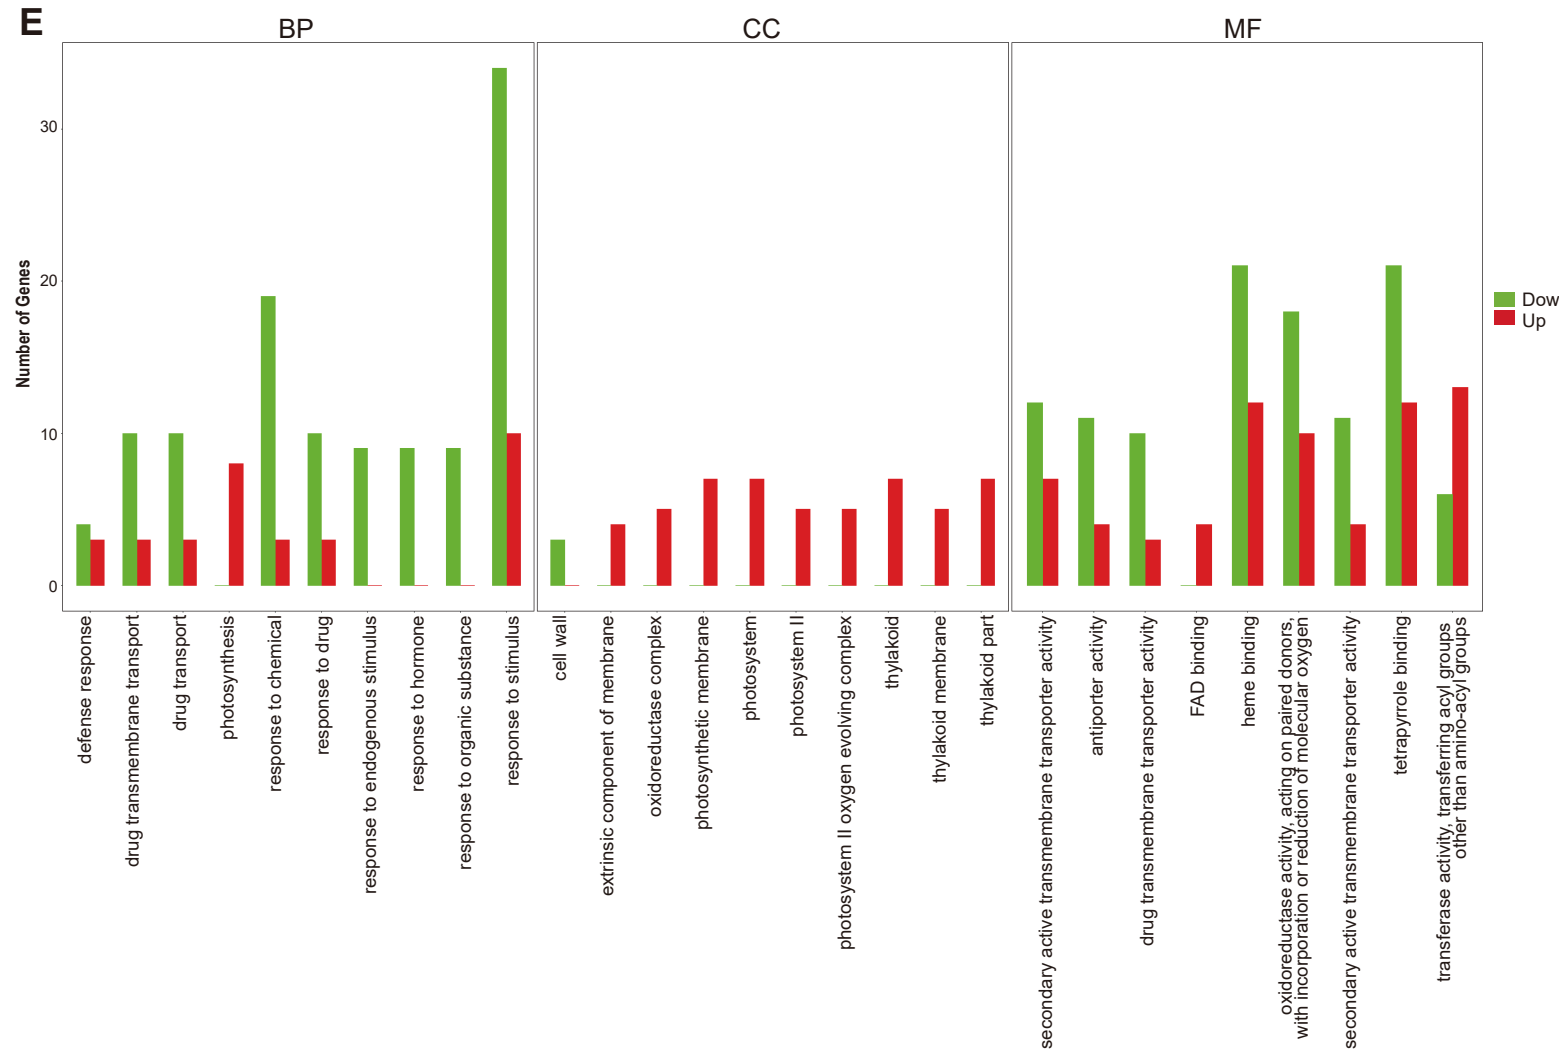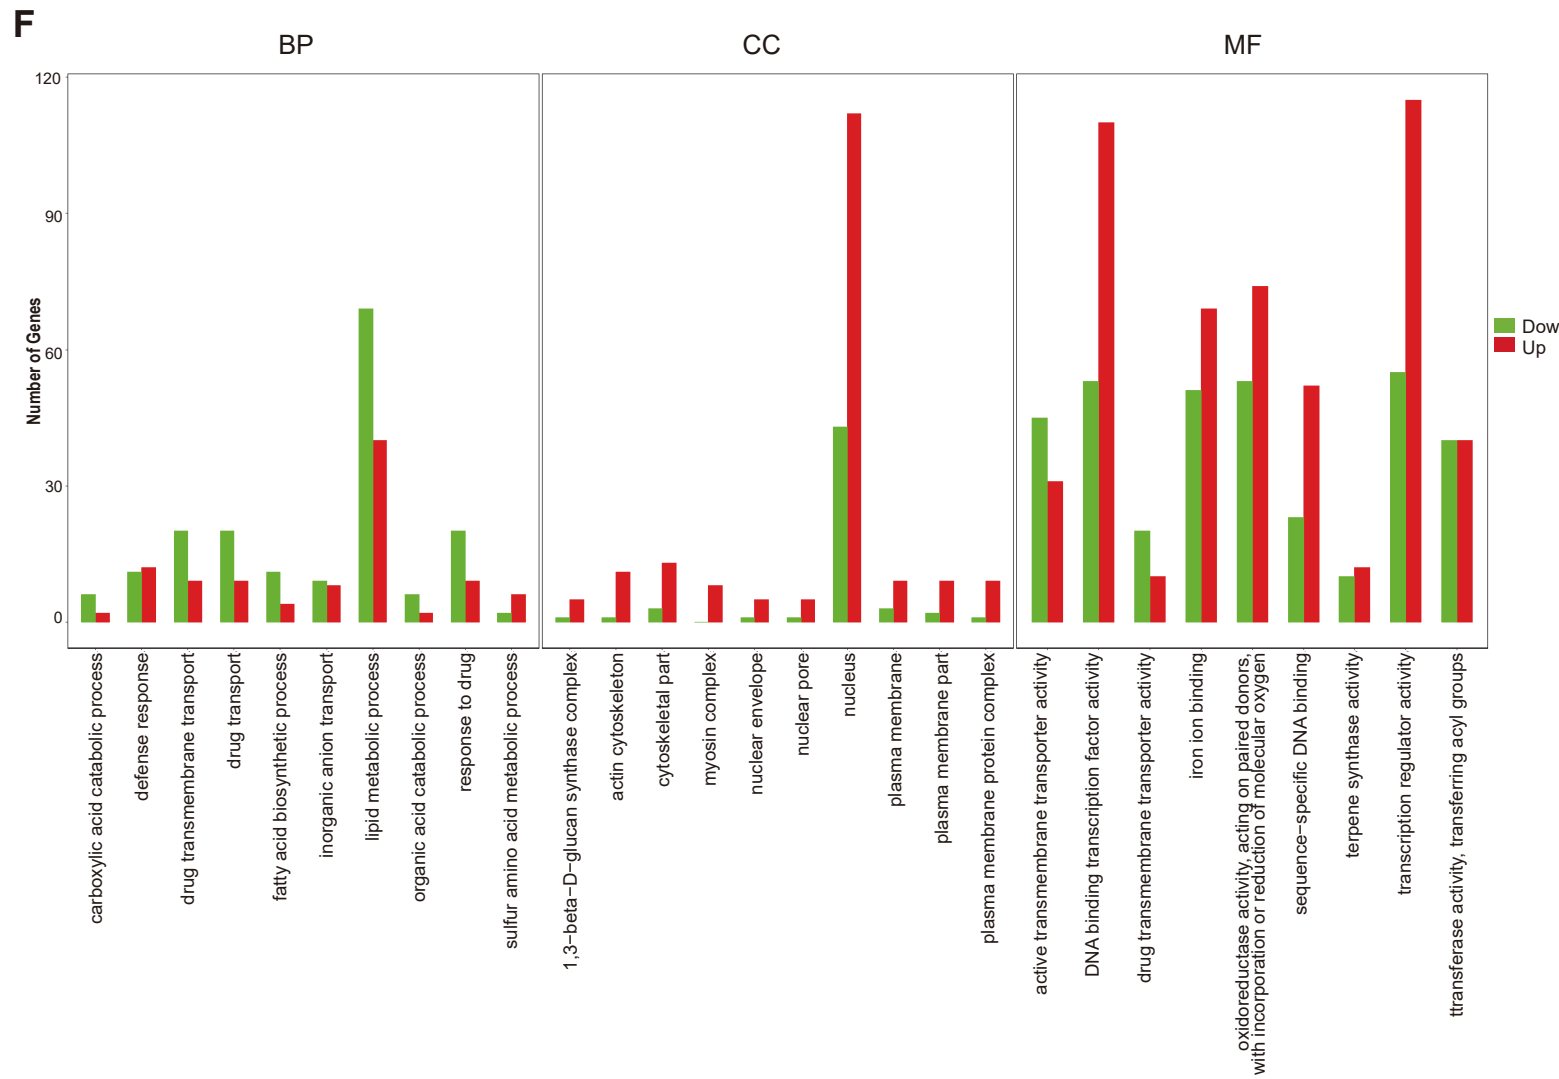

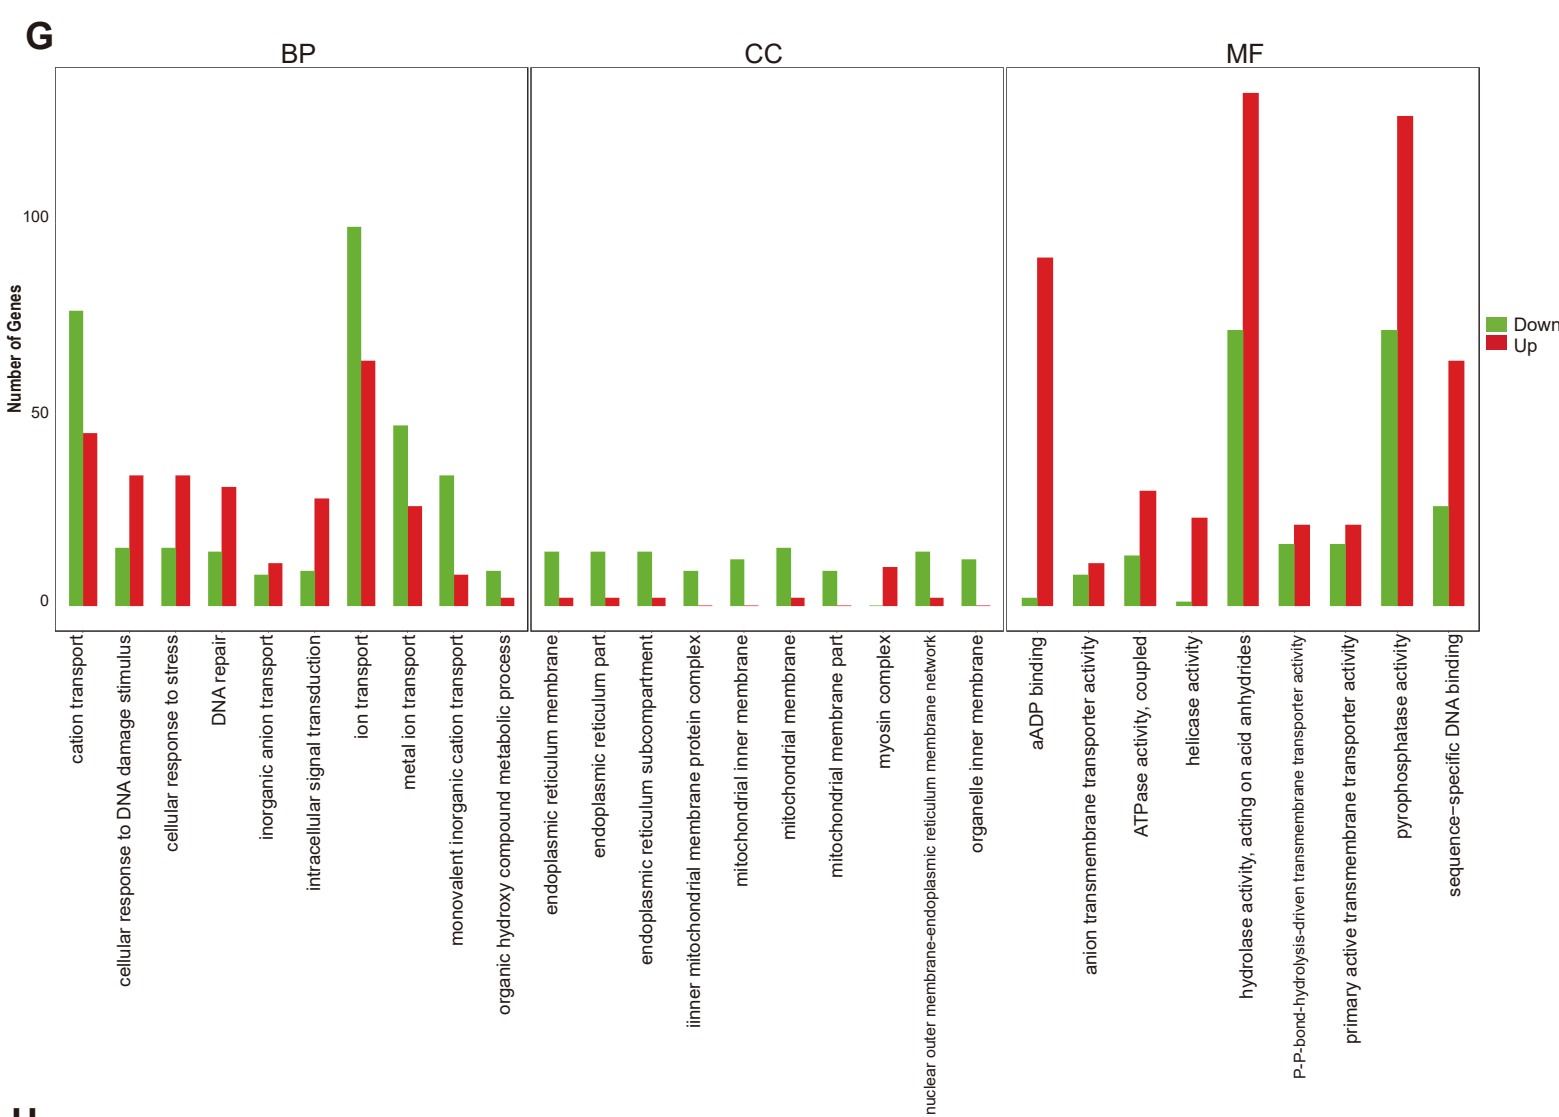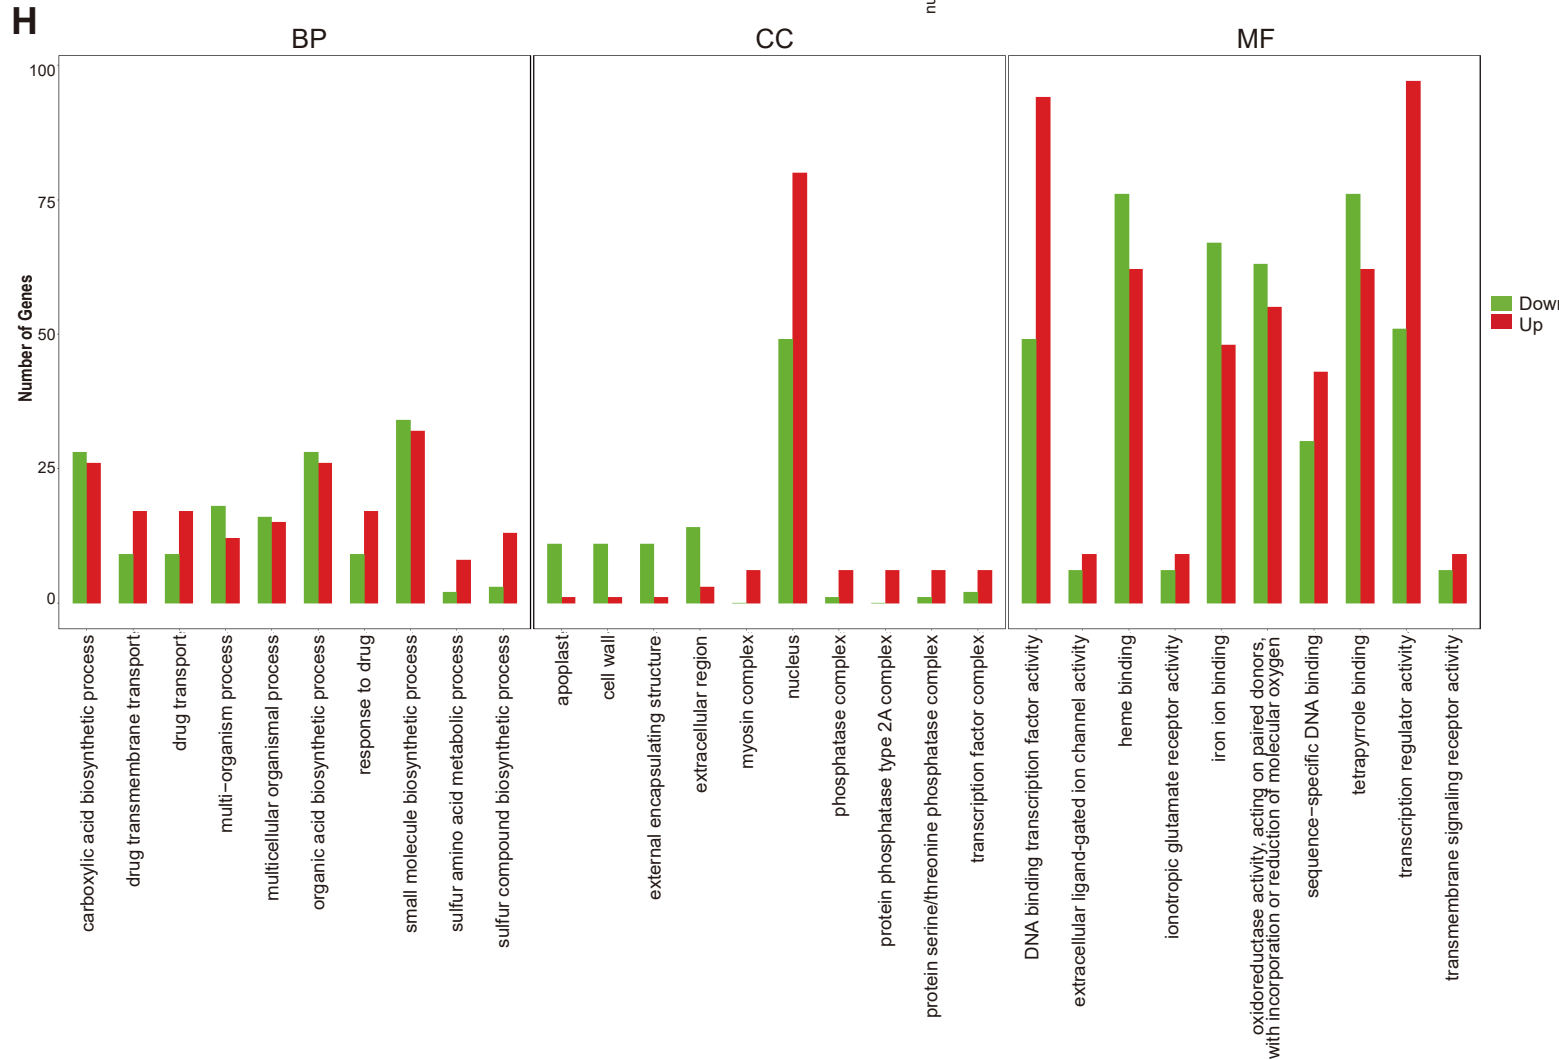

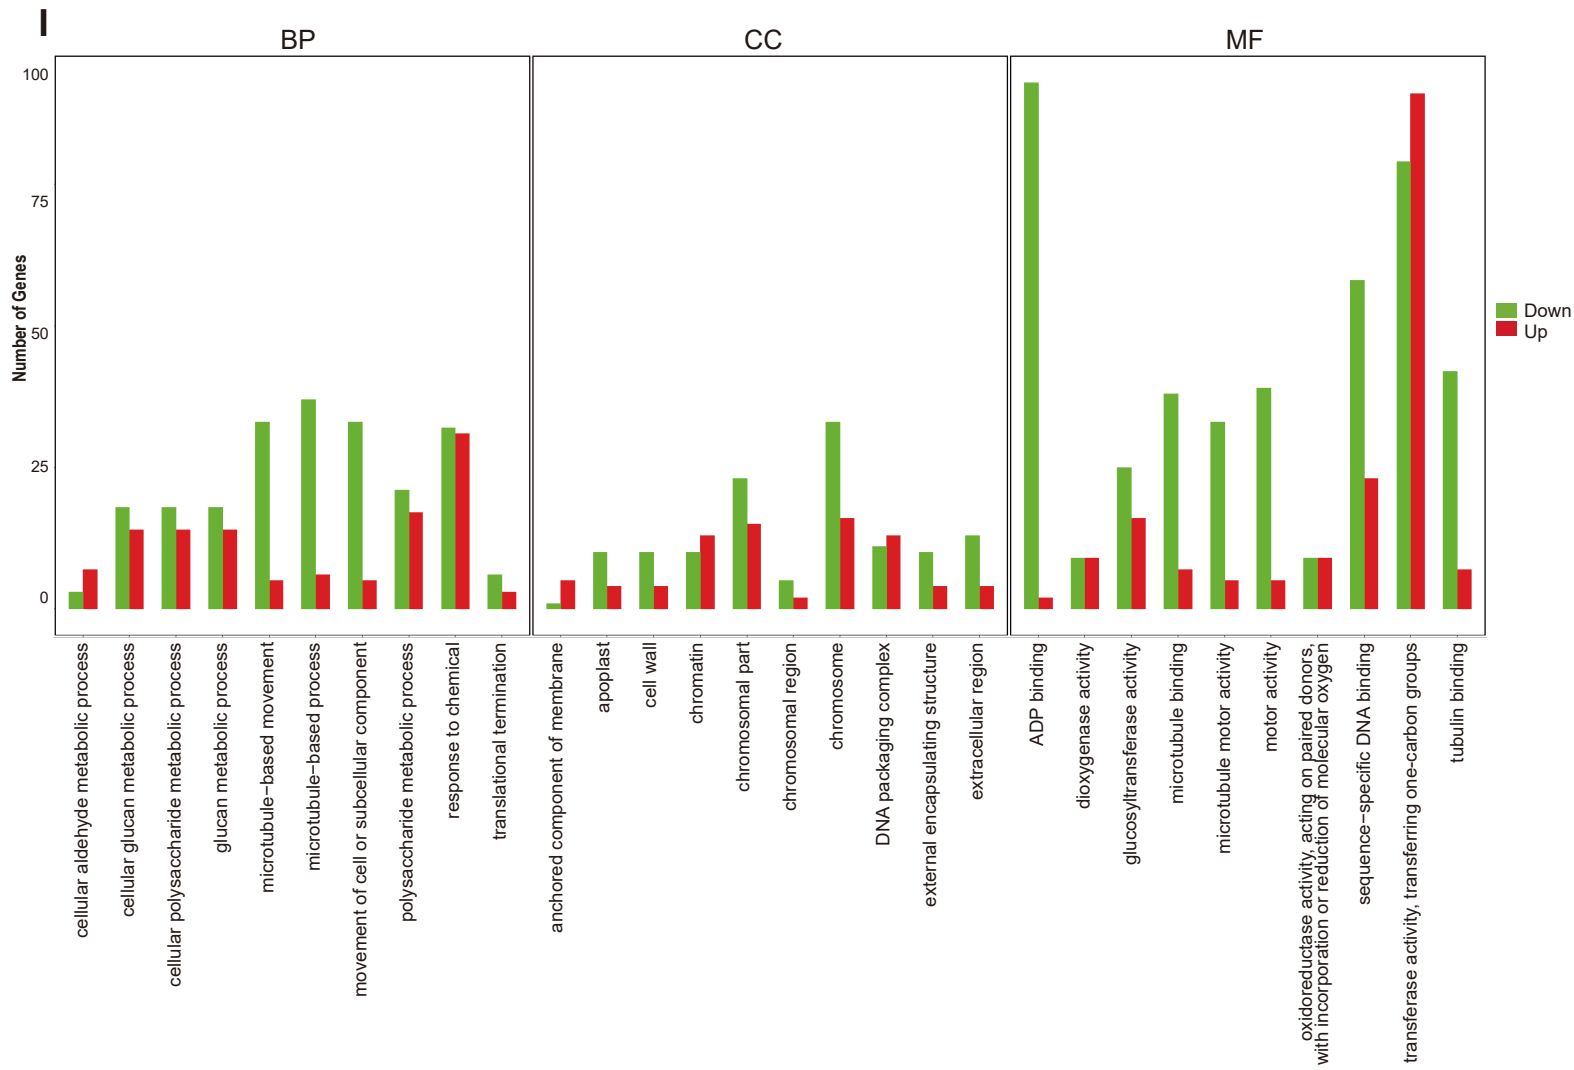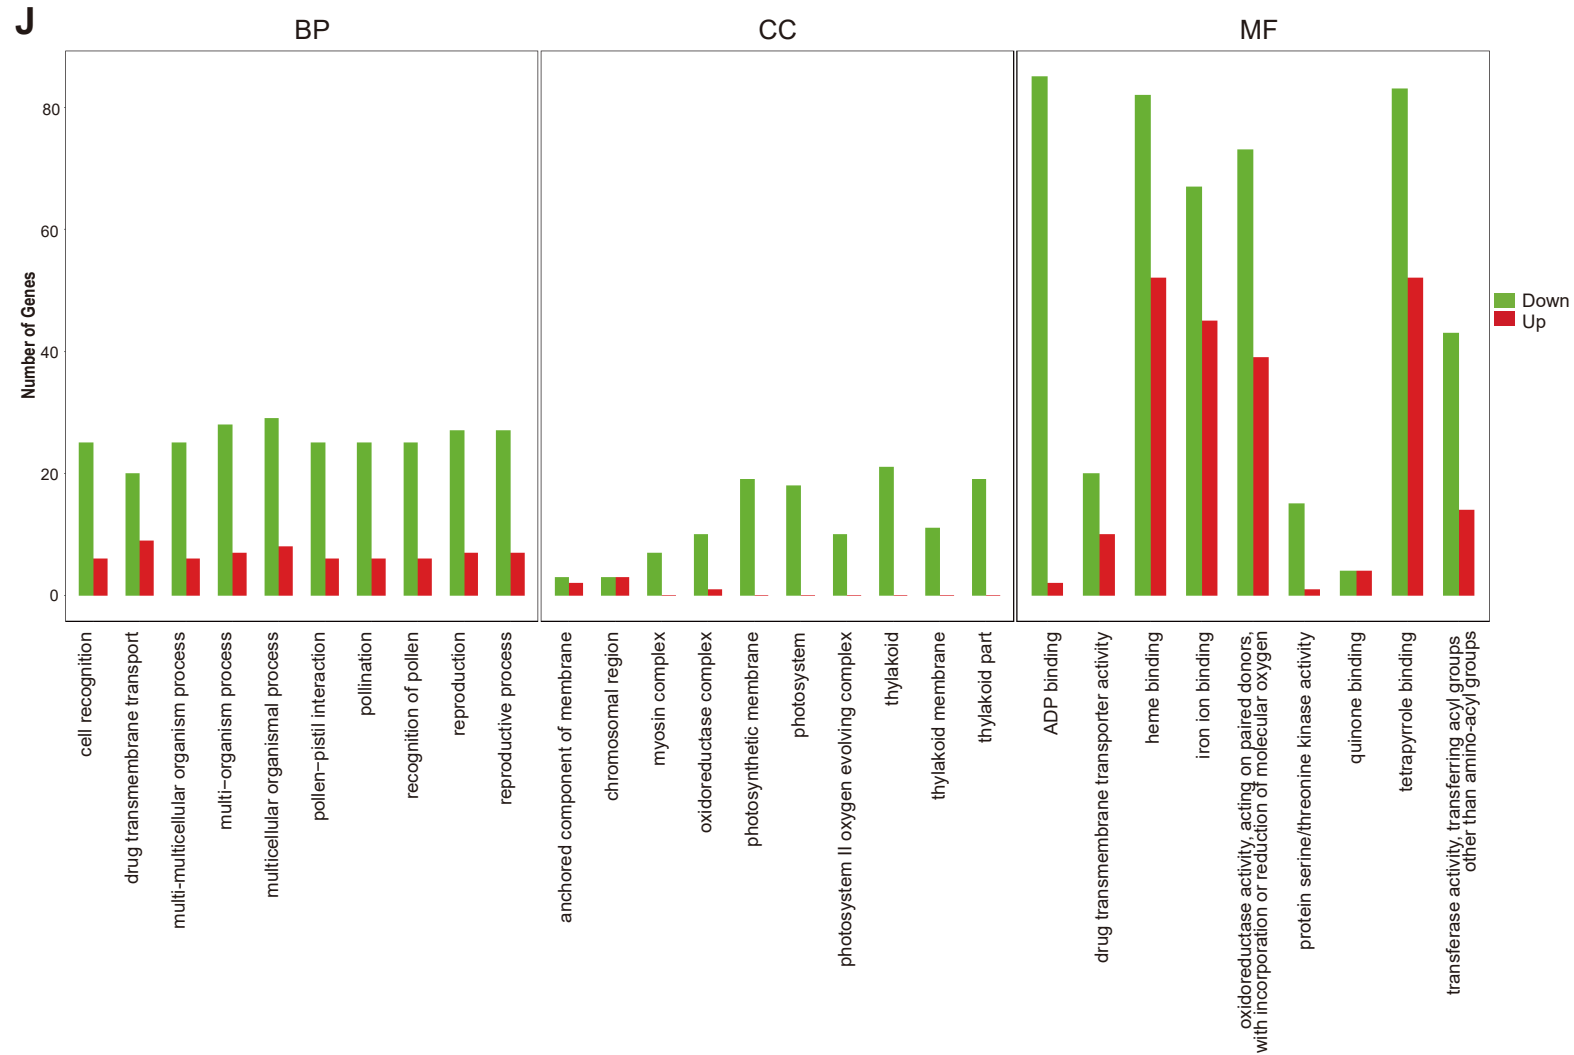

K

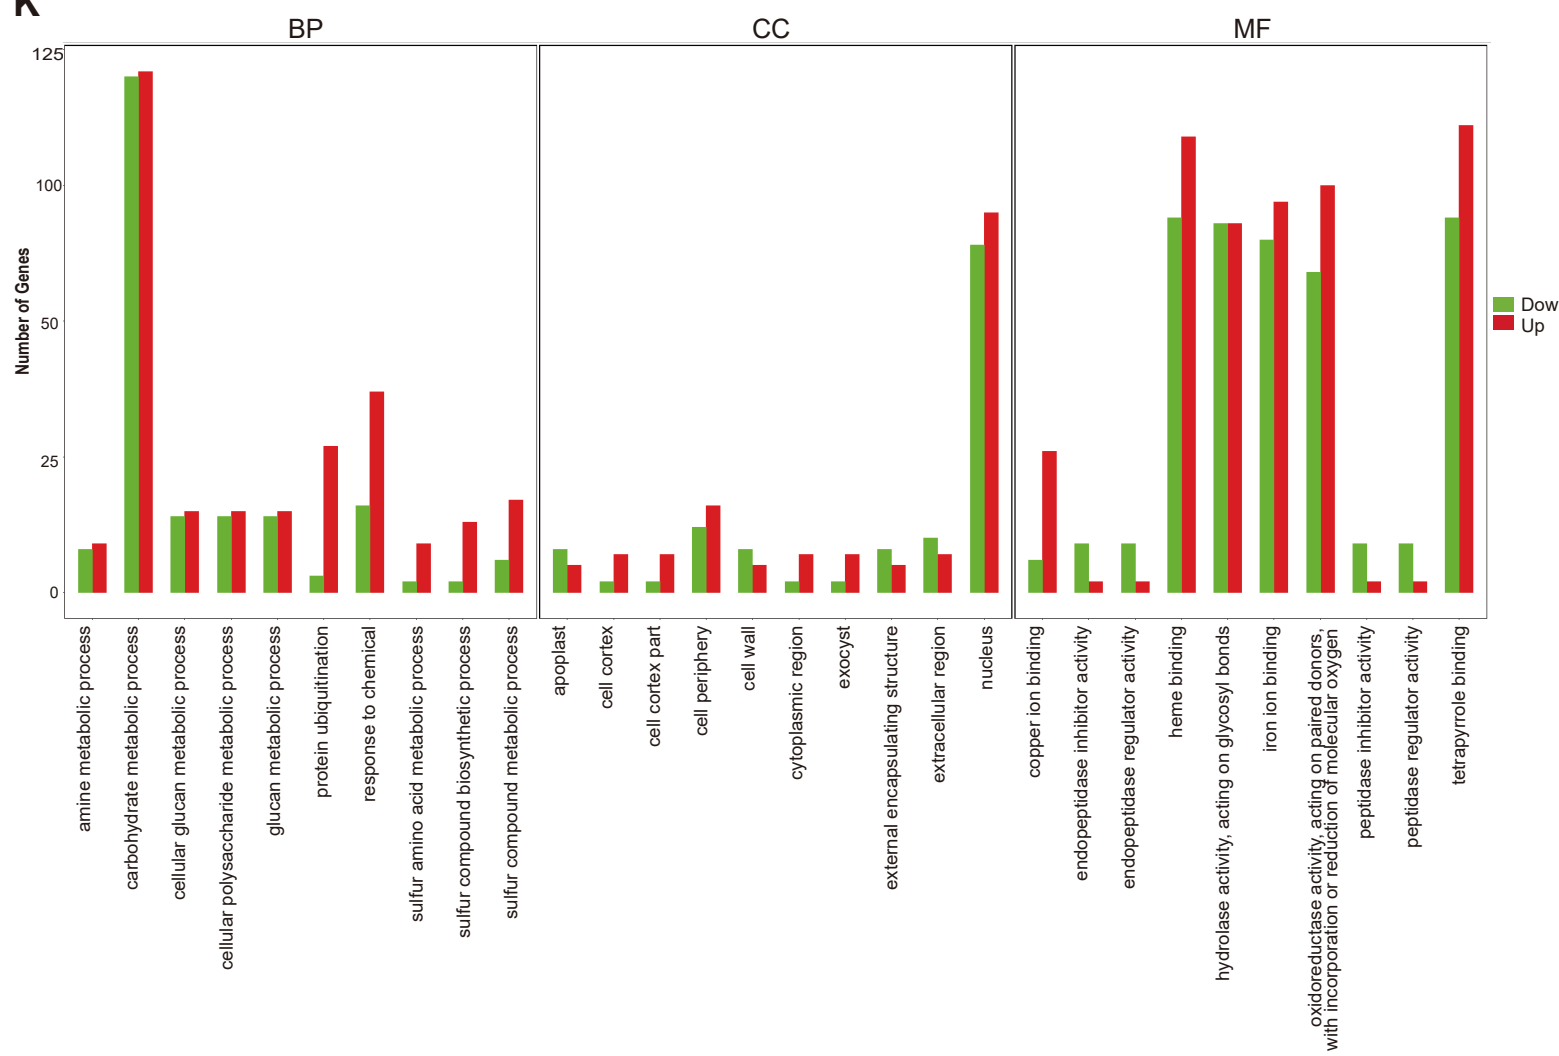

L

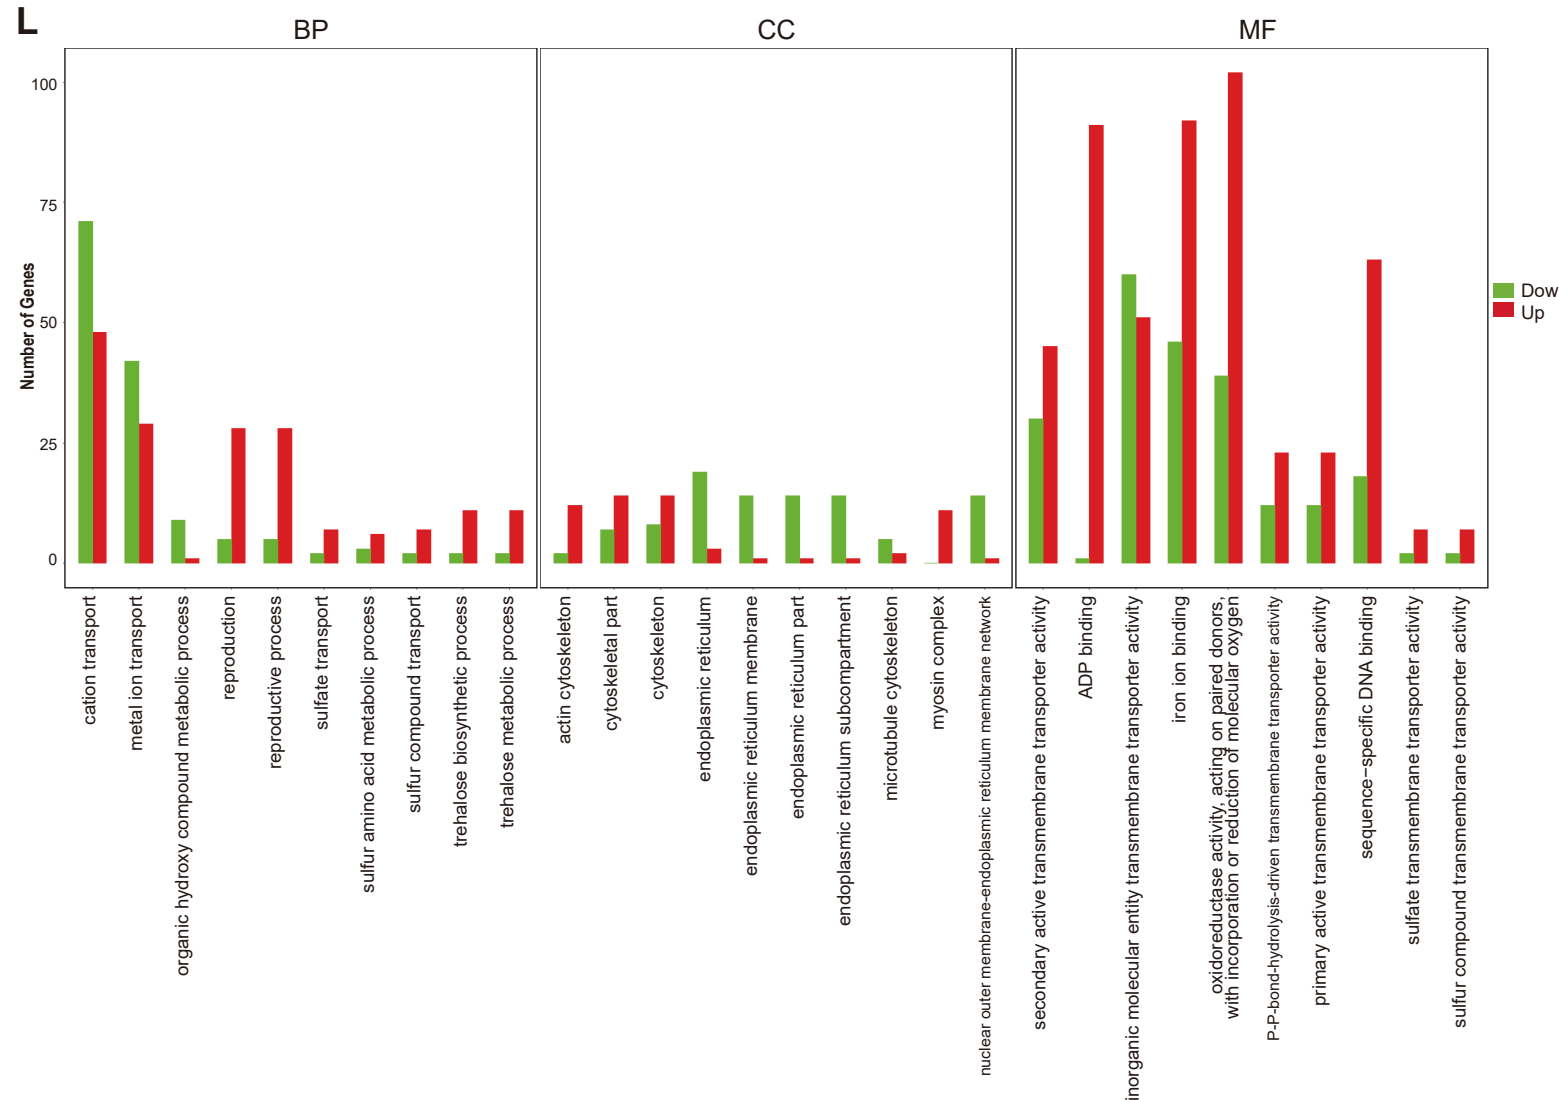

M

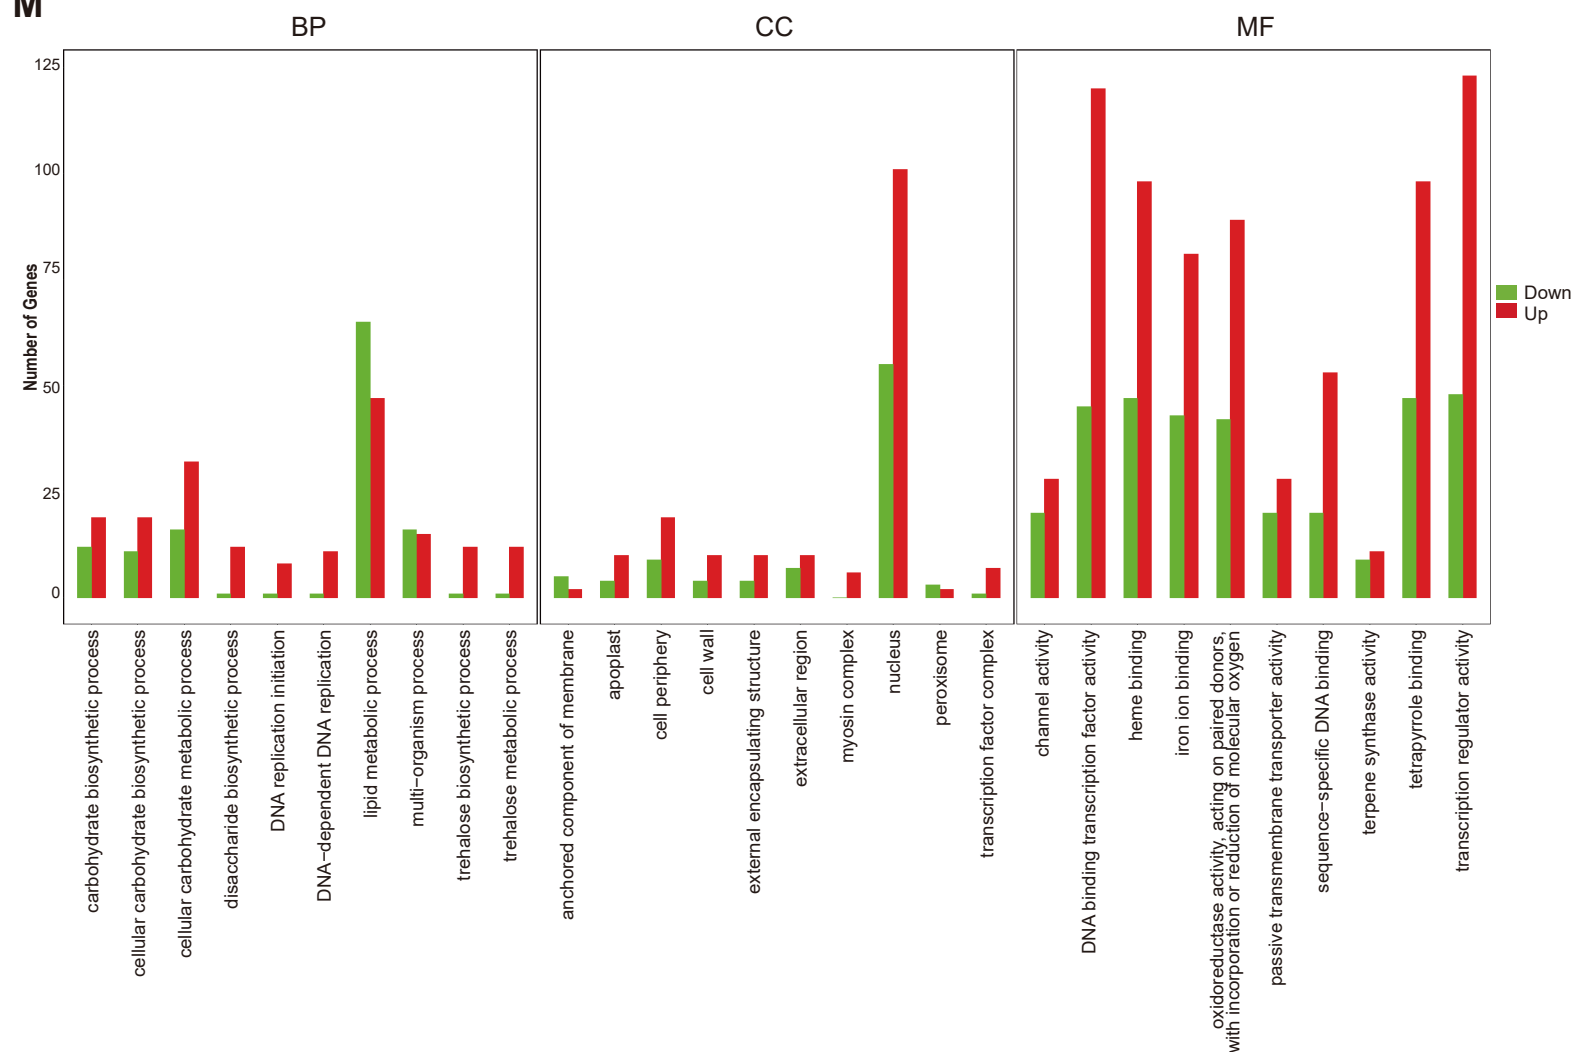

Supplementary Figure S7. Enriched GO terms of DEGs between different control groups. (A) LeafvsHusk, (B) LeafvsLeafCallus, (C) LeafvsRoot, (D) Leafvsseed, (E) LeafvsStem, (F) RootvsHusk, (G) Rootvsseed, (H) RootvsLeafCallus, (I) SeedvsLeafCallus, (J) SeedvsHusk, (K) StemvsLeafCallus, (L) StemvsSeed, (M) Stem vsHusk.
