# Supplementary material for: Comparative Analysis of Metabolome and Transcriptome in Different Tissue Sites of Aquilaria sinensis (Lour.) Gilg
Source: MDPI journal article supplement (doi:10.3390/molecules29051075), 2024-02-29
Supplement: s1 [file s1]

**A**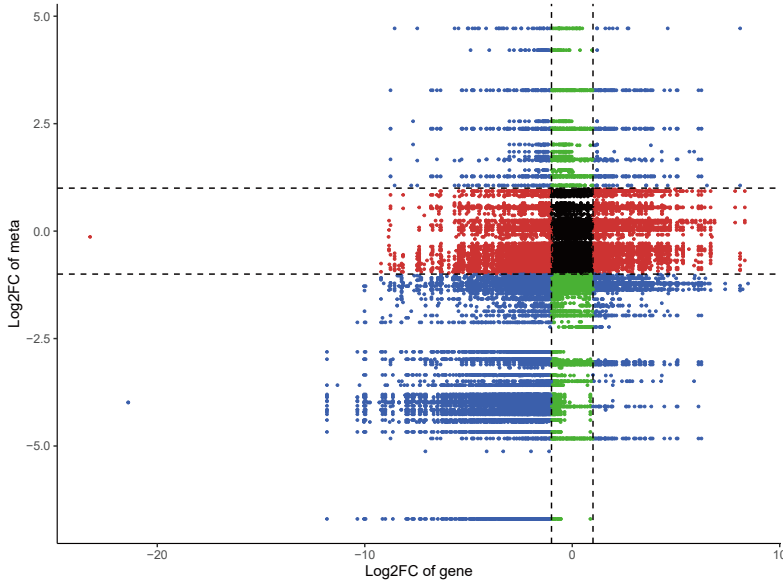**B**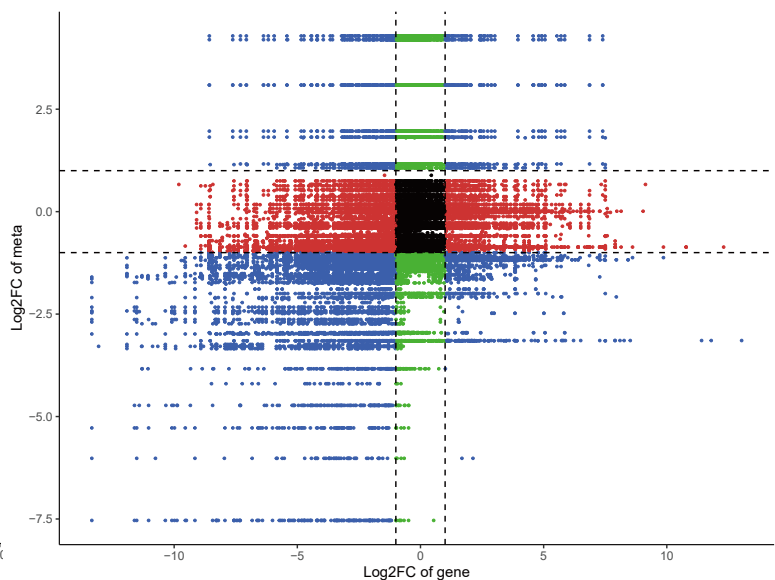**C**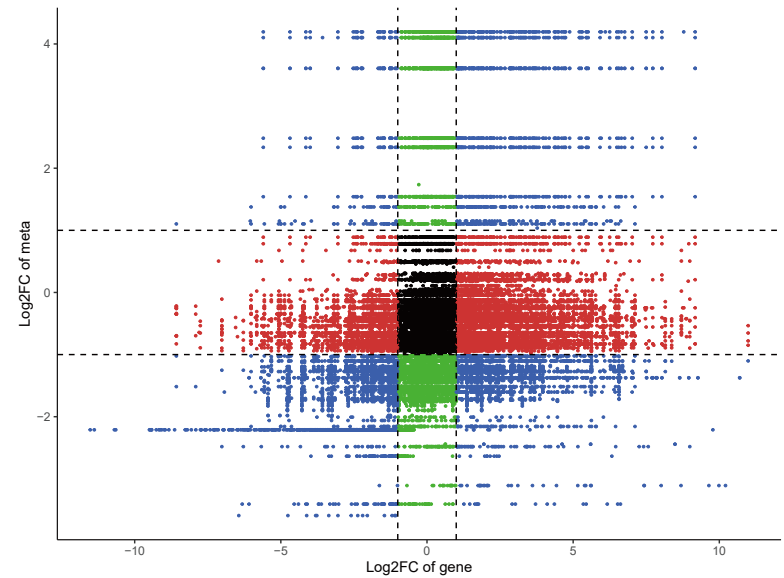**D**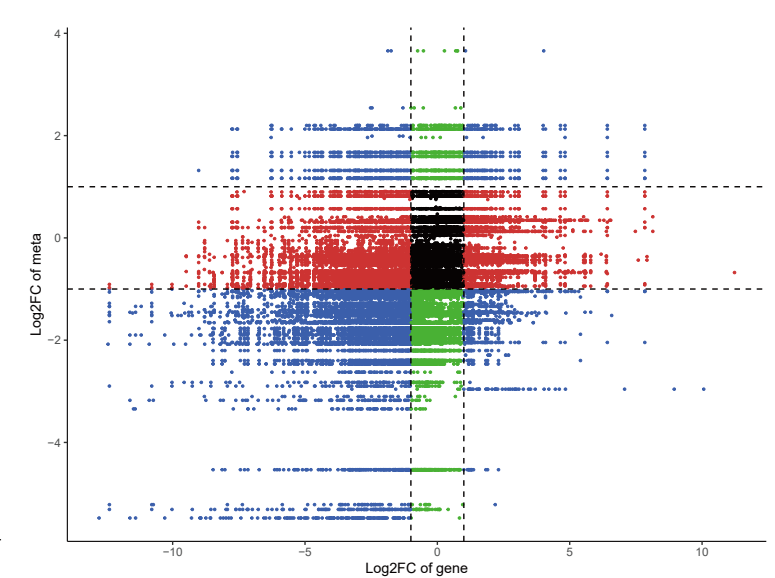**E**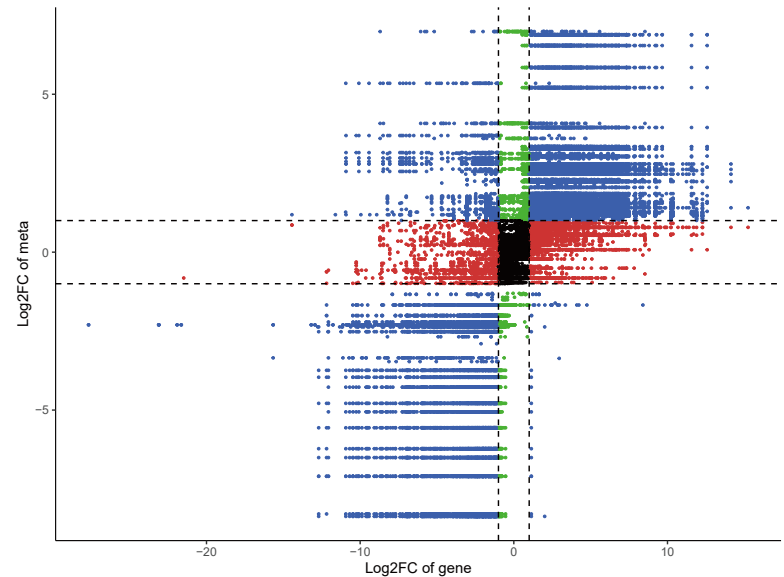**F**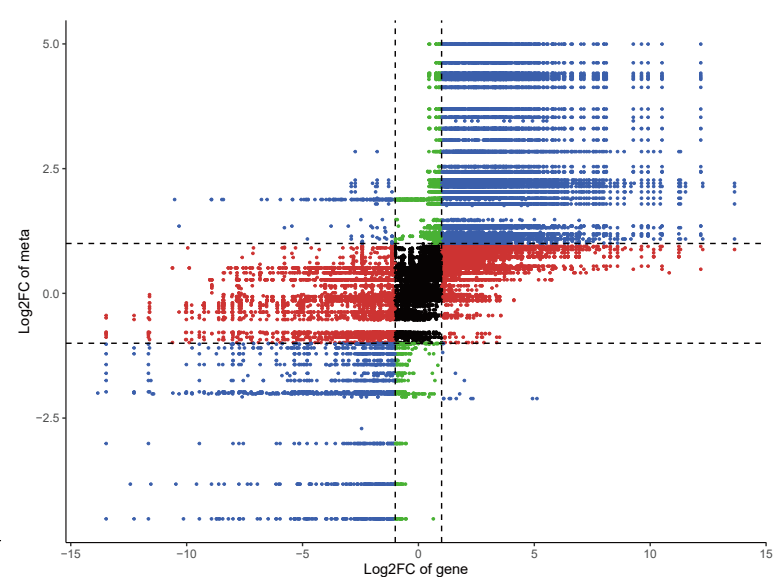

**G**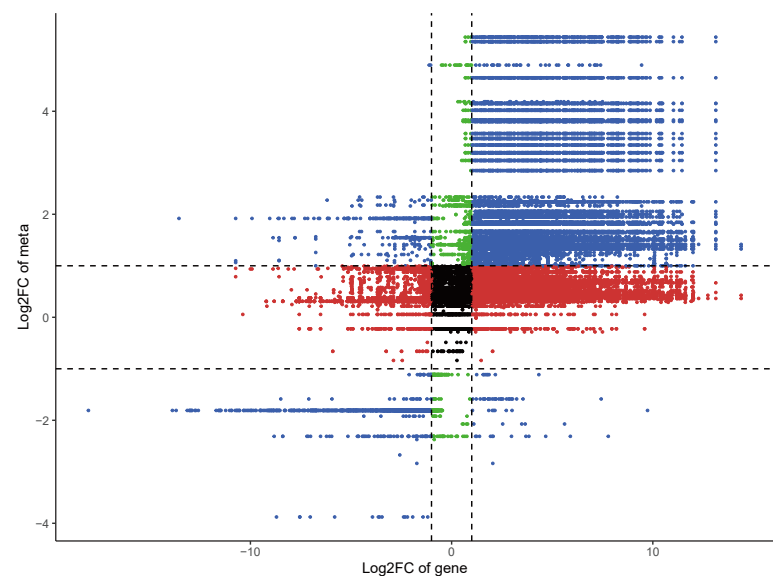**H**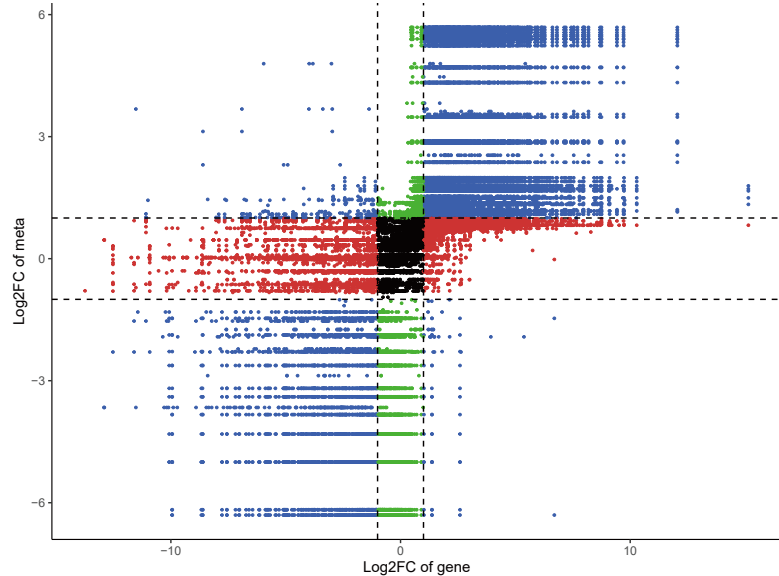**I**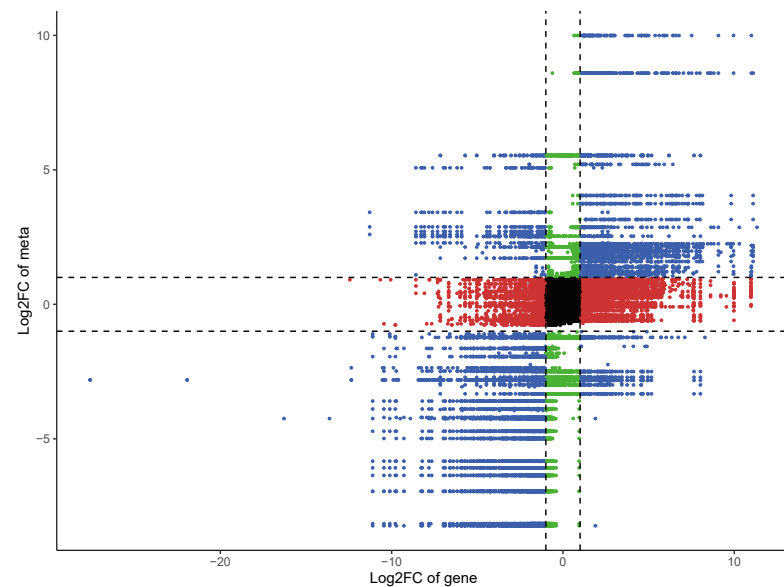**J**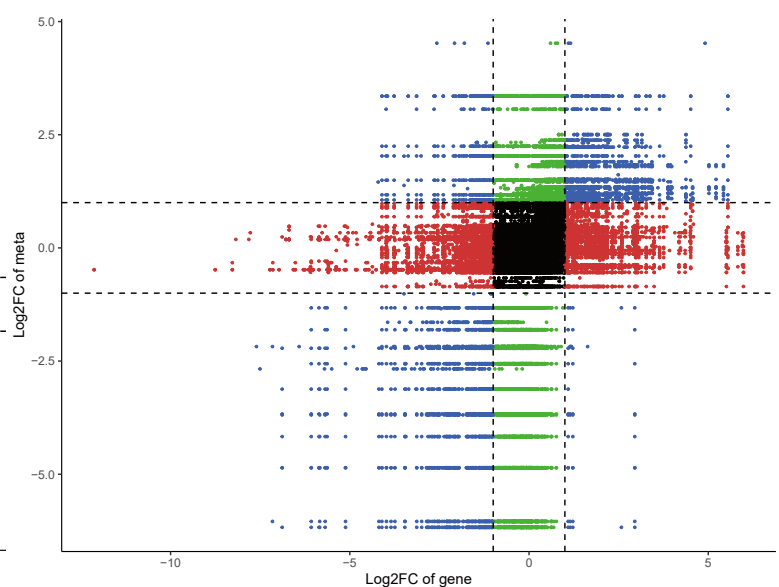**K**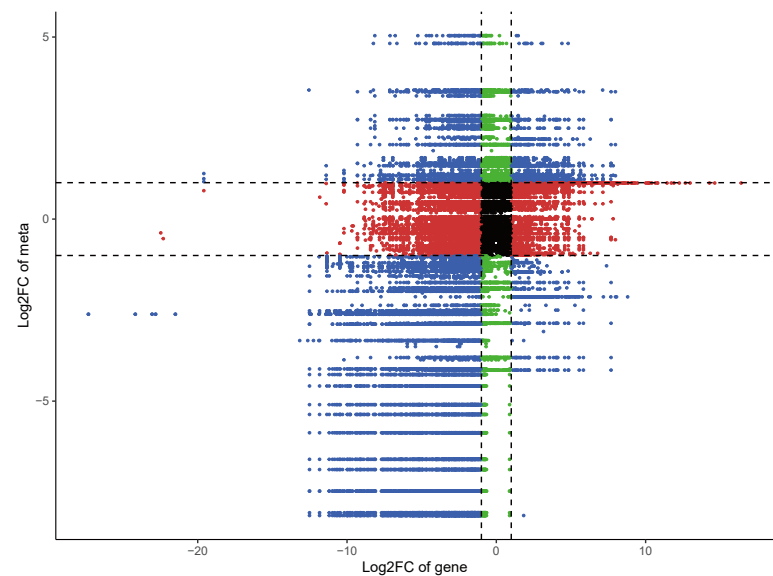**L**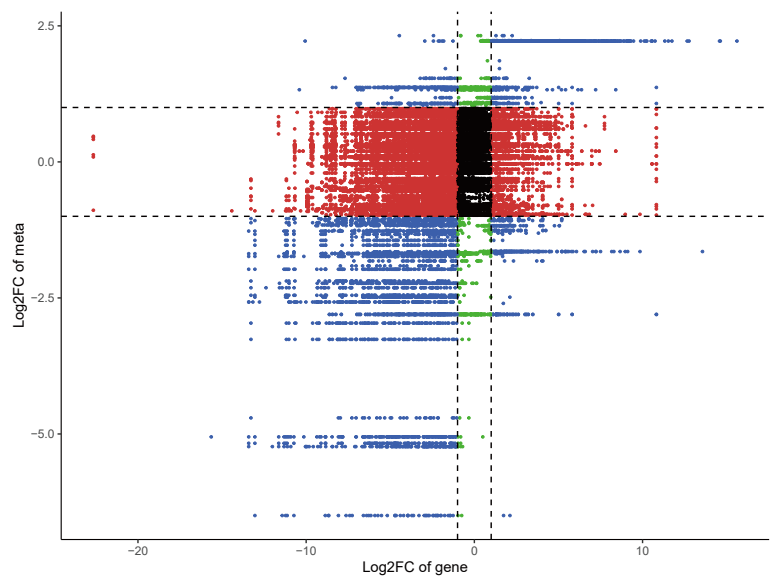

**M**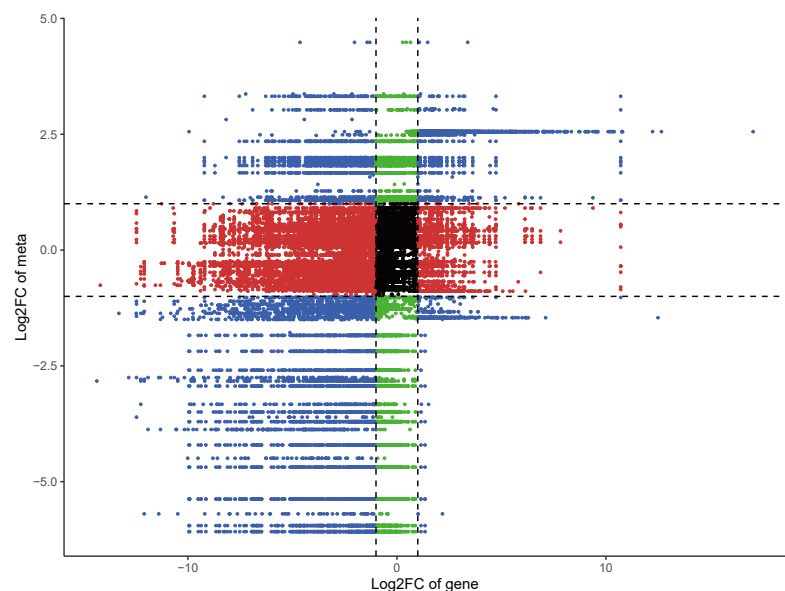**N**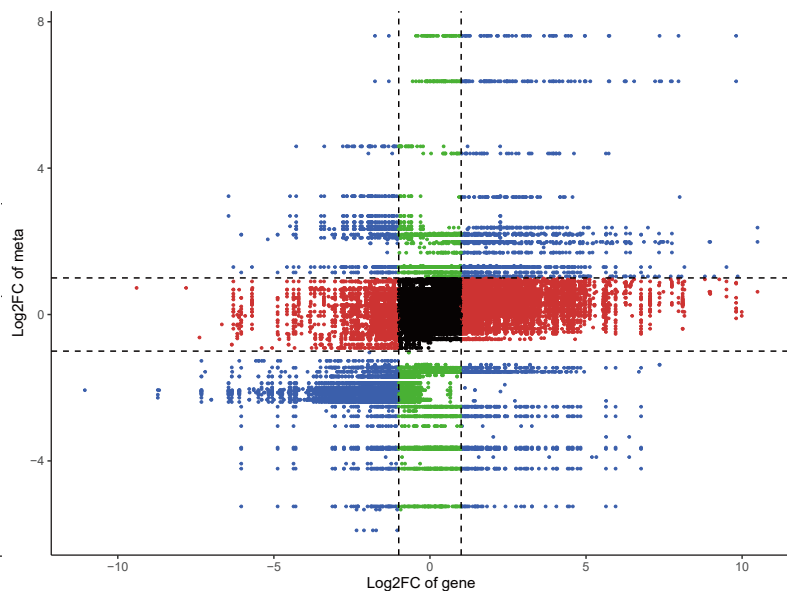

Supplementary Figure S9. Nine quadrant diagram showing the correlation of differentially expressed genes and differentially accumulated metabolites. (A) HuskvsLeaf, (B) HuskvsRoot, (C) HuskvsSeed, (D) HuskvsStem, (E) LeafCallusvsLeaf, (F) LeafCallusvsRoot, (G) LeafCallusvsSeed, (H) LeafCallusvsStem, (I) RootvsLeaf, (J) RootvsStem, (K) SeedvsLeaf, (L) SeedvsRoot, (M) SeedvsSeed, (N) StemvsLeaf.
