# Supplementary material for: Comparative Analysis of Metabolome and Transcriptome in Different Tissue Sites of Aquilaria sinensis (Lour.) Gilg
Source: MDPI journal article supplement (doi:10.3390/molecules29051075), 2024-02-29
Supplement: s1 [file s1]

**A**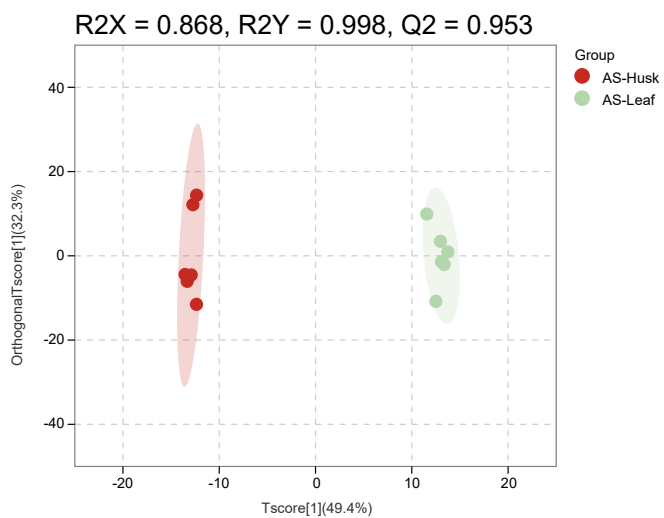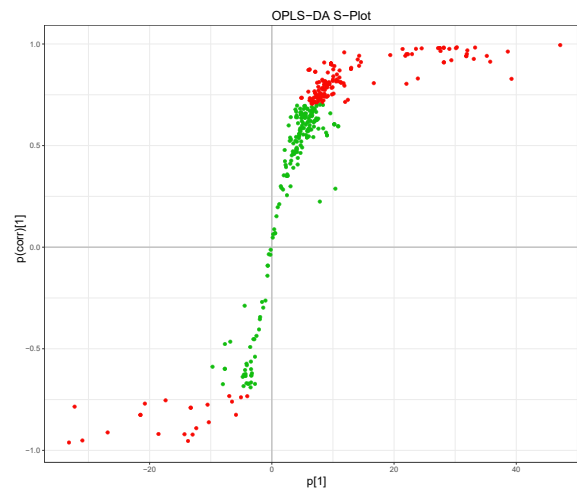**B**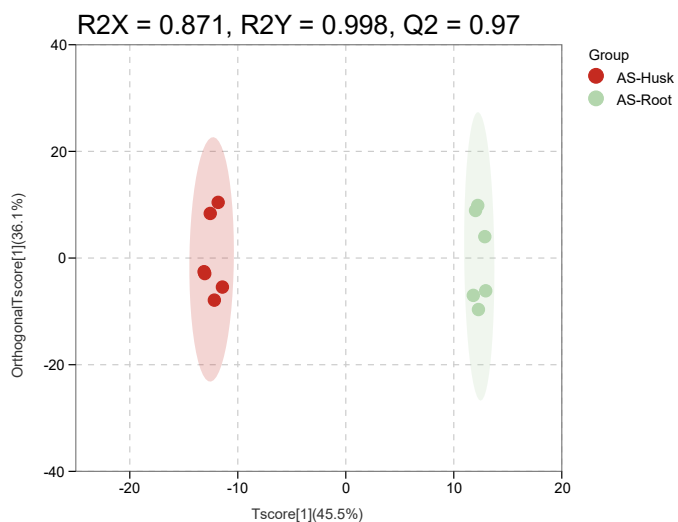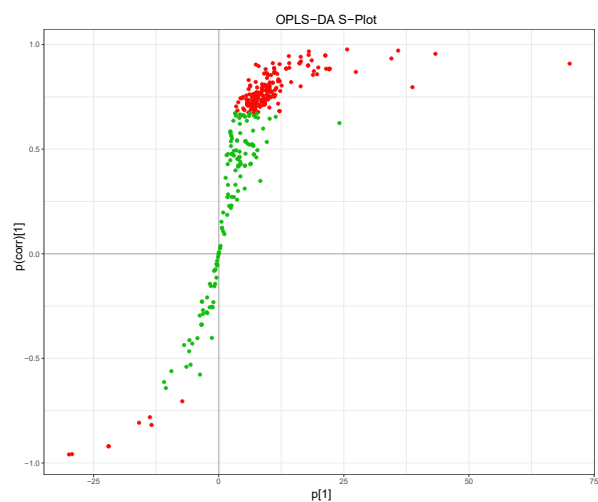**C**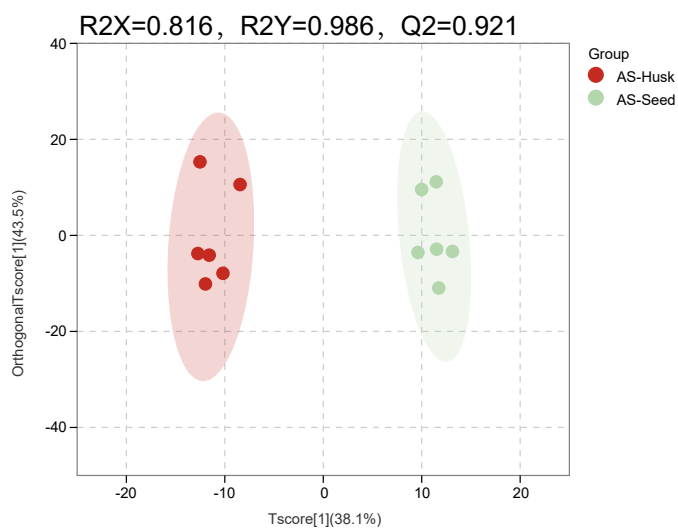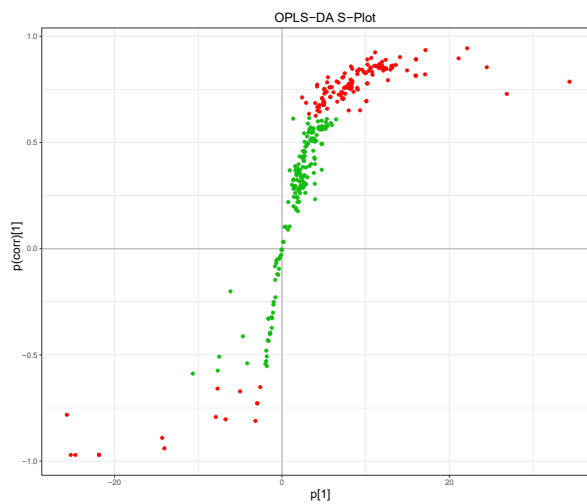**D**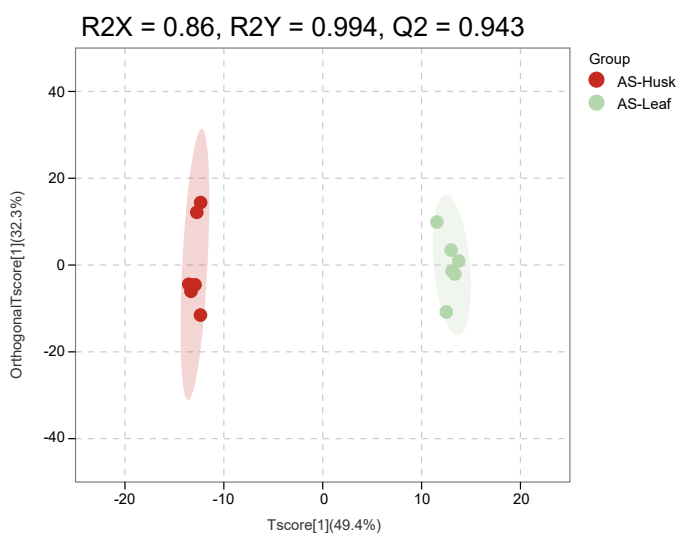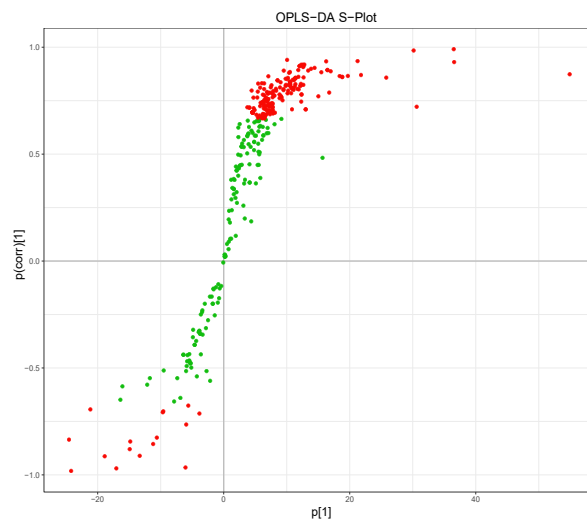

**E**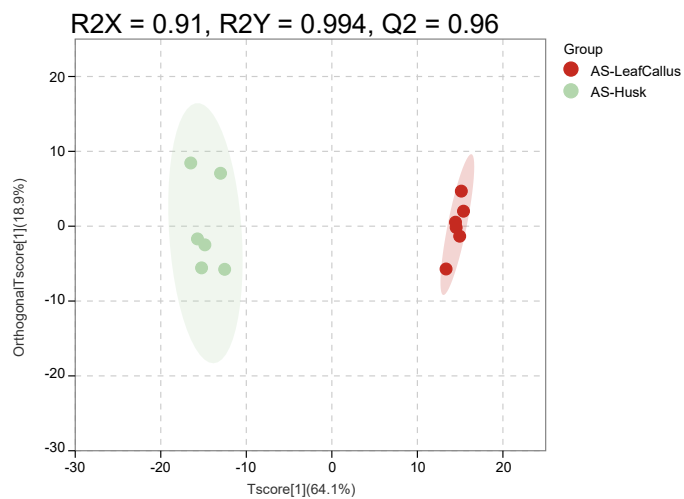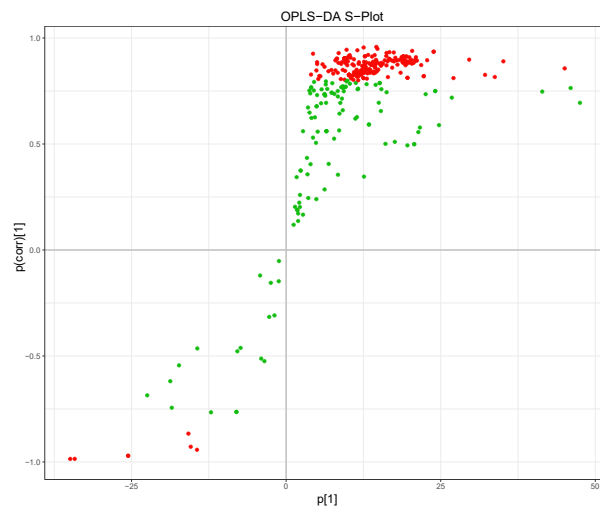**F**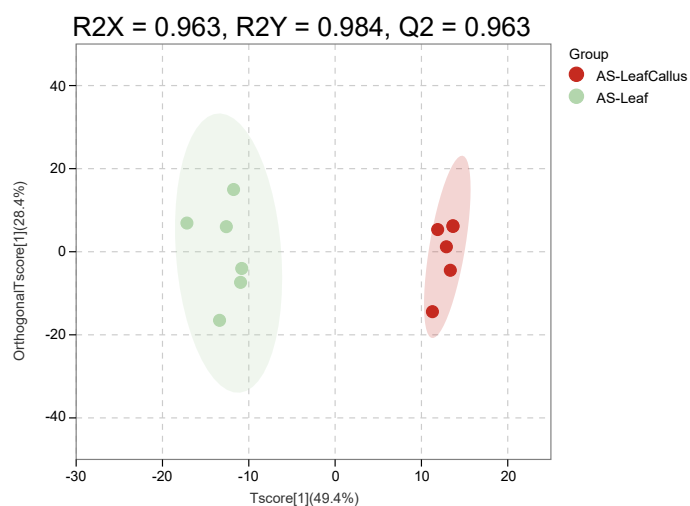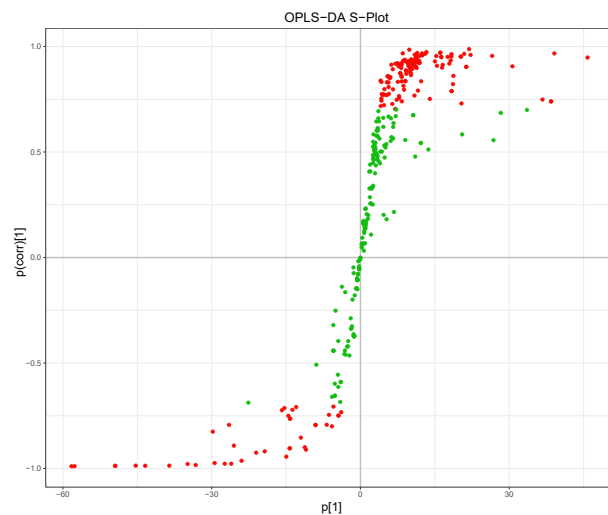**G**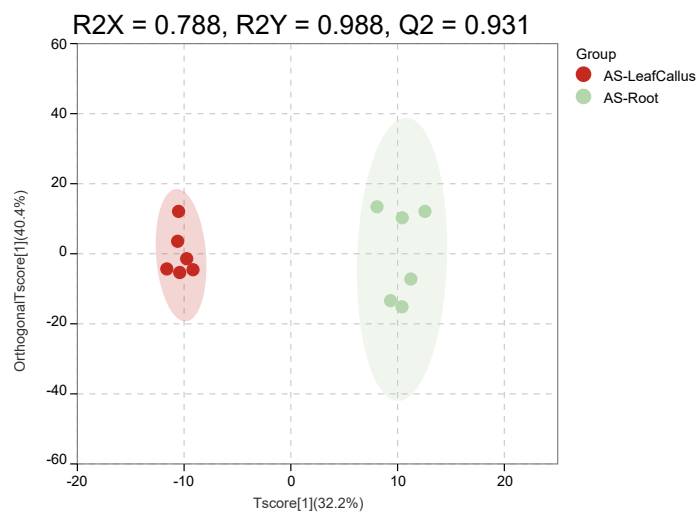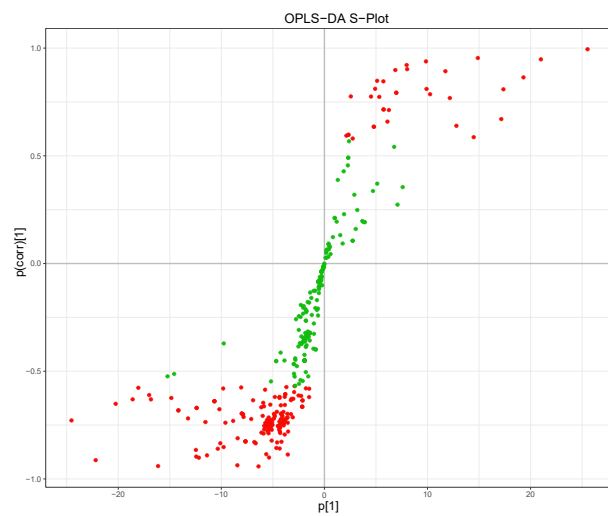**H**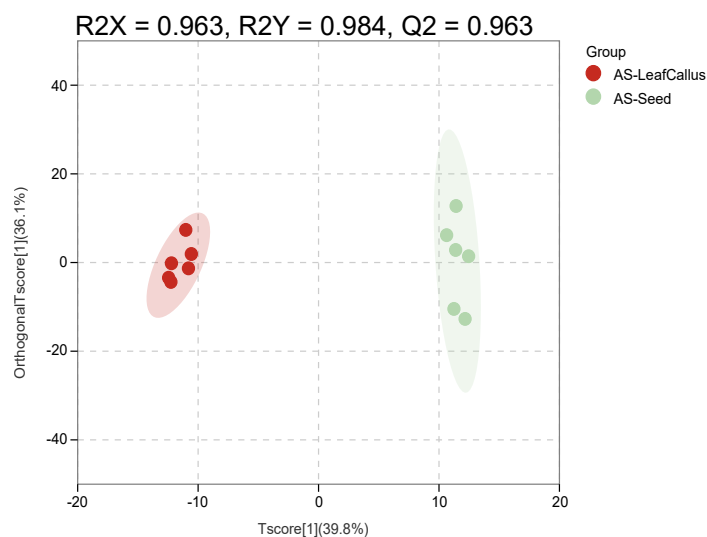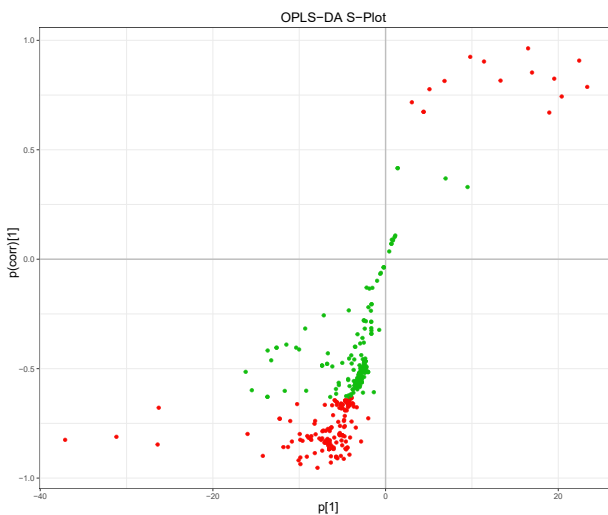

**I** R2X = 0.757, R2Y = 0.991, Q2 = 0.953

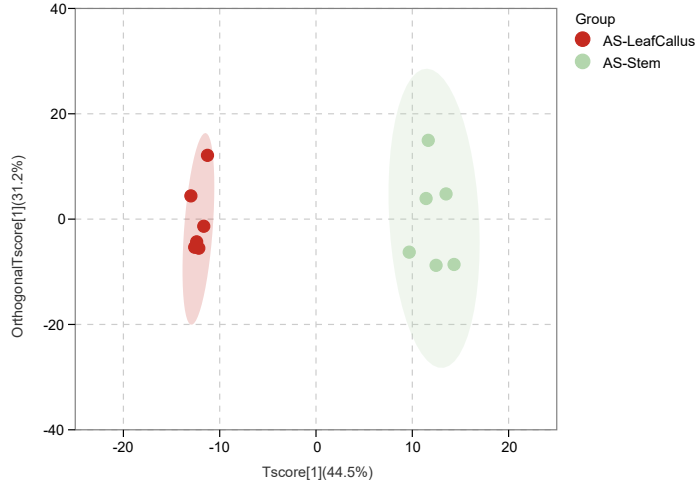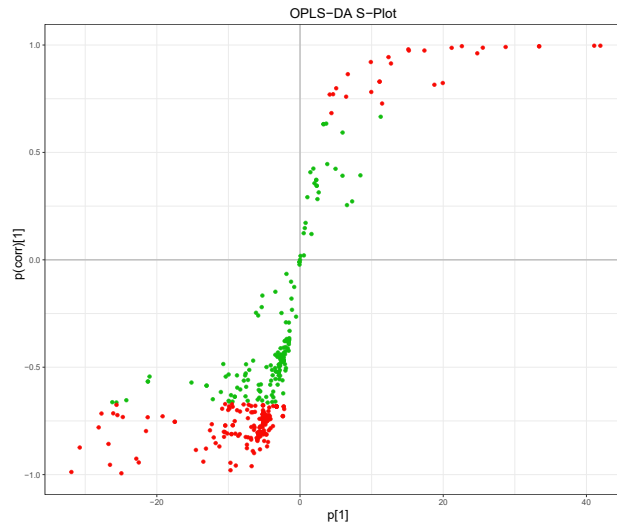

**J** R2X = 0.839, R2Y = 0.997, Q2 = 0.979

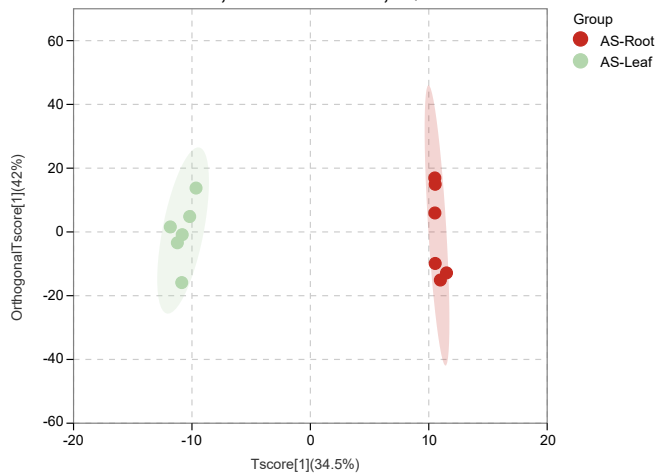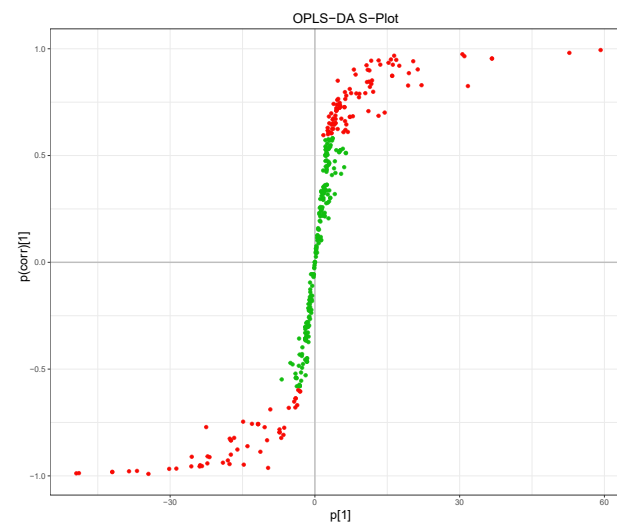

**K** R2X = 0.813, R2Y = 0.994, Q2 = 0.945

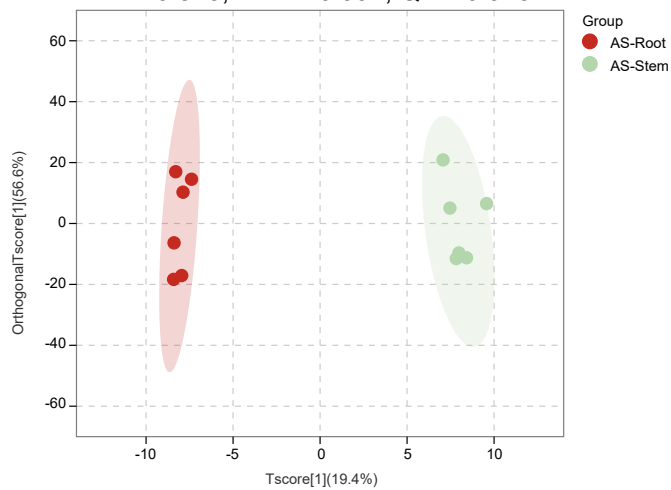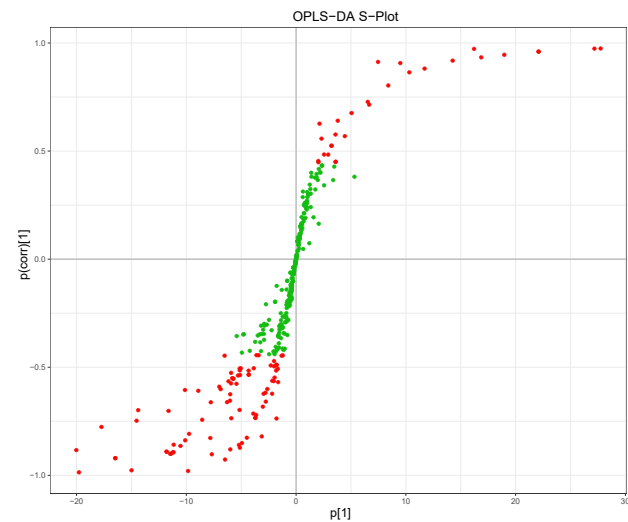

**L** R2X = 0.963, R2Y = 0.984, Q2 = 0.963

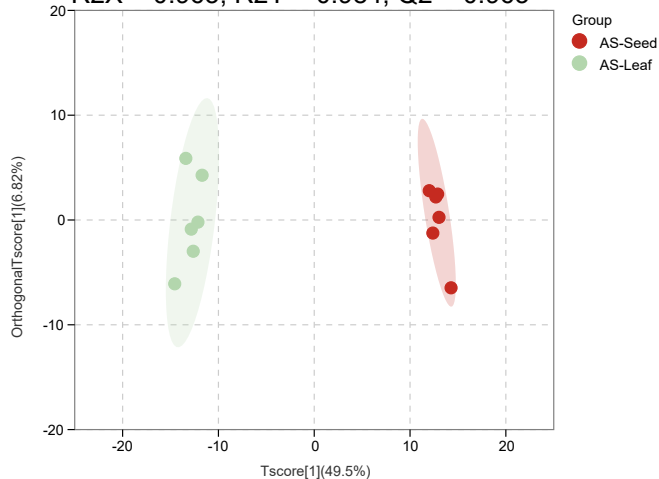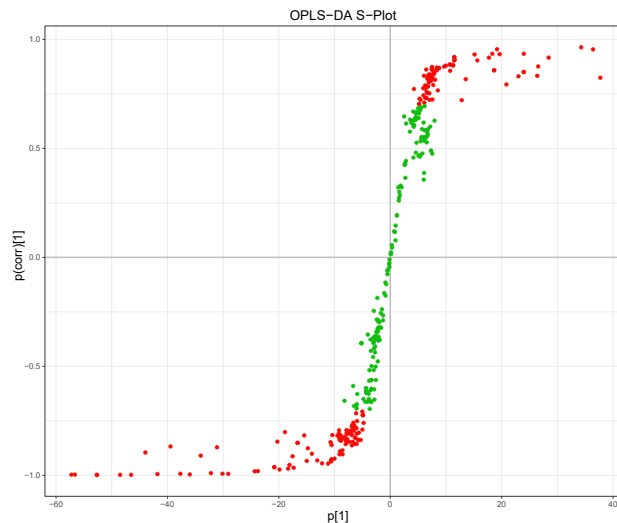

M

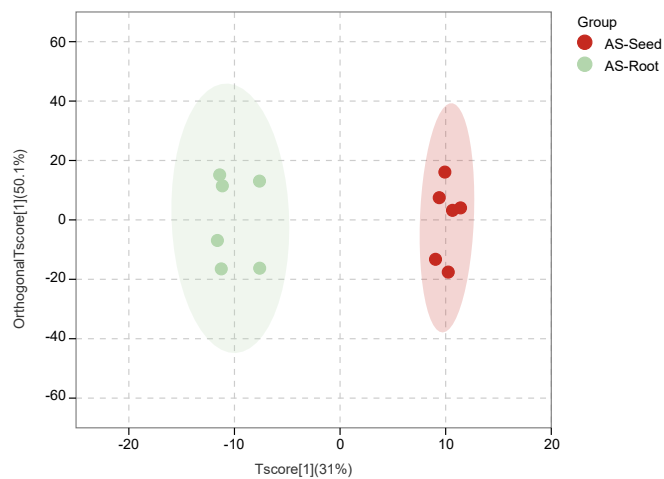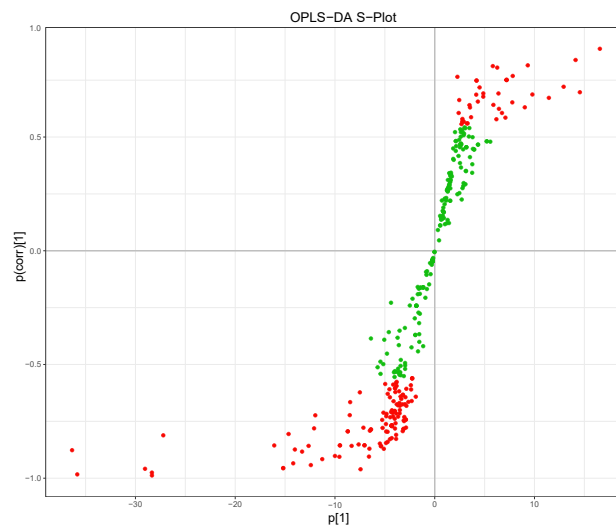

N

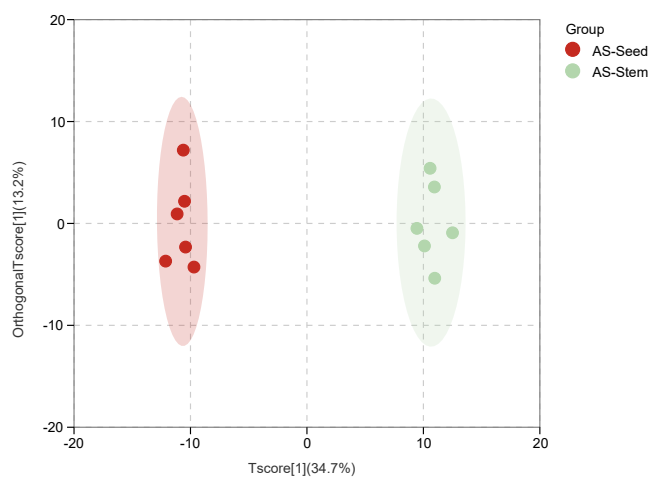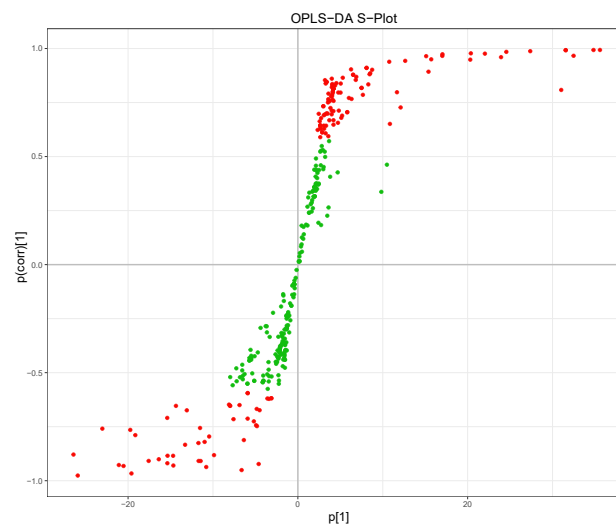

O

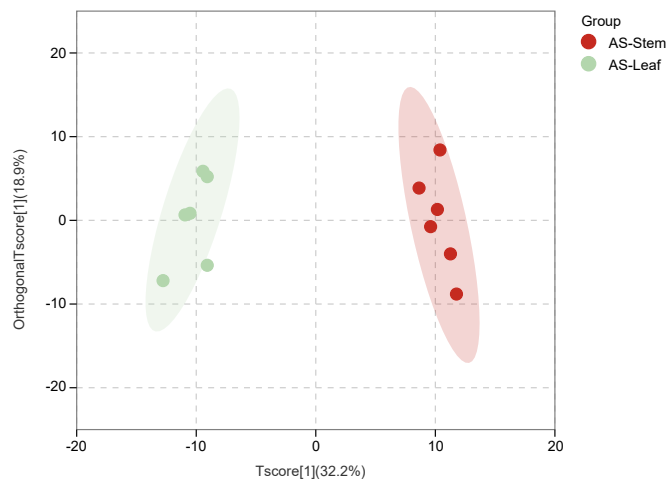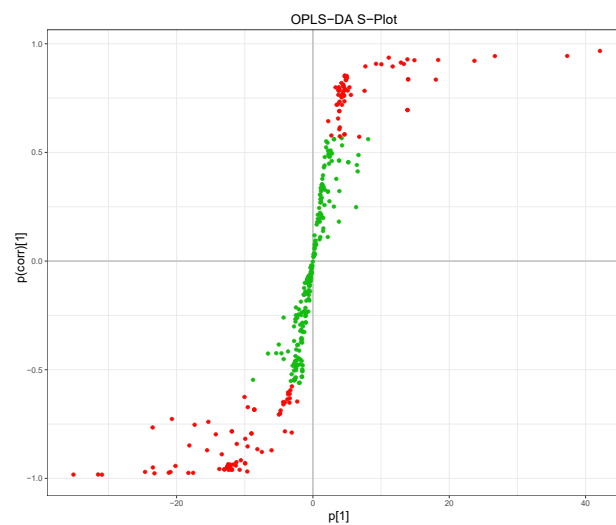

Supplementary Figure S2. Orthogonal partial least squares-discriminant analysis (OPLS-DA) scores and OPLS-DA S-plot models between six different tissue sites. (A) AS-Husk\_vs\_AS-Leaf, (B) AS-Husk\_vs\_AS-Root, (C) AS-Husk\_vs\_AS-Seed, (D) AS-Husk\_vs\_AS-Stem, (E) AS-LeafCallus\_vs\_AS-Husk, (F) AS-LeafCallus\_vs\_AS-Leaf, (G) AS-LeafCallus\_vs\_AS-Root, (H) AS-LeafCallus\_vs\_AS-Seed, (I) AS-LeafCallus\_vs\_AS-Stem, (J) AS-Root\_vs\_AS-Leaf, (K) AS-Root\_vs\_AS-Stem, (L) AS-Seed\_vs\_AS-Leaf, (M) AS-Seed\_vs\_AS-Root, (N) AS-Seed\_vs\_AS-Stem, (O) AS-Stem\_vs\_AS-Leaf.
