# Supplementary material for: Comparative Analysis of Metabolome and Transcriptome in Different Tissue Sites of Aquilaria sinensis (Lour.) Gilg
Source: Molecules. 2024 Feb 29;29(5):1075. doi: 10.3390/molecules29051075 (PMC10935121; doi:10.3390/molecules29051075)
Supplement: Supplementary file 1 [file molecules-29-01075-s001.zip › Supplementary Table S1.xlsx]

## Sheet: Sheet1
Table S1. Summary of 331 differential metabolites identified by GC-MS.
Compounds	Compound type	Formula	CAS	Relative content
				AS-Leaf-1	AS-Leaf-2	AS-Leaf-3	AS-Leaf-4	AS-Leaf-5	AS-Leaf-6	AS-Stem-1	AS-Stem-2	AS-Stem-3	AS-Stem-4	AS-Stem-5	AS-Stem-6	AS-Root-1	AS-Root-2	AS-Root-3	AS-Root-4	AS-Root-5	AS-Root-6	AS-Seed-1	AS-Seed-2	AS-Seed-3	AS-Seed-4	AS-Seed-5	AS-Seed-6	AS-Husk-1	AS-Husk-2	AS-Husk-3	AS-Husk-4	AS-Husk-5	AS-Husk-6	AS-LeafCallus-1	AS-LeafCallus-2	AS-LeafCallus-3	AS-LeafCallus-4	AS-LeafCallus-5	AS-LeafCallus-6
1-OctanAmine,N-methyl-	Amine	C9H21N	2439-54-5	0.0876786	0.0776605	0.166601	0.0883036	0.0850037	0.375491	0.161524	0.123882	0.135392	0.109411	0.0822425	0.104553	0.154708	0.255411	0.3058	0.315065	0.162437	0.198629	0.0971089	0.0929599	0.0997612	0.087686	0.140437	0.151093	0.105337	0.0644466	0.115216	0.0550998	0.0590462	0.0590997	0.18899	0.258004	0.163237	0.229228	0.141267	0.178723
Acetamide, N-(2-phenylethyl)-	Amine	C10H13NO	877-95-2	0.0127079	0.00896494	0.0170228	0.0120346	0.00794242	0.0136215	0.00833909	0.0290882	0.0204551	0.00879717	0.00420362	0.0140678	0.0246698	0.0757381	0.0491865	0.0515631	0.0238867	0.0112642	0.0268879	0.0247786	0.0238238	0.0104063	0.0285825	0.0388365	0.0174821	0.0234047	0.0355905	0.0194012	0.0185637	0.0339158	0.0304987	0.0306644	0.019988	0.0306871	0.0473915	0.029782
Benzamide	Amine	C7H7NO	55-21-0	0.341264	0.148787	0.393384	0.370541	0.342581	0.427137	0.0334656	0.0380065	0.0376255	0.0415392	0.0356729	0.0530249	0.373024	0.771653	0.800711	0.646951	0.367483	0.346497	0.428007	0.390665	0.453228	0.294806	0.573134	0.637013	0.304453	0.223548	0.375753	0.192792	0.214406	0.25651	0.4376	0.670503	0.523661	0.538539	0.420744	0.445541
BenzenAmine, N,N-dimethyl-	Amine	C8H11N	121-69-7	0.00948114	0.00683205	0.0148862	0.00979803	0.00857305	0.0102721	0.025904	0.0180372	0.0209192	0.0188731	0.0167395	0.0195657	0.0247922	0.0939747	0.0840996	0.111727	0.0500626	0.0250573	0.00897282	0.00742737	0.00928029	0.00886648	0.0123318	0.0141906	0.0107876	0.00489843	0.0119846	0.00404364	0.00470759	0.00508062	0.0124434	0.0155037	0.0129674	0.0142351	0.00827961	0.0111962
Caprolactam	Amine	C6H11NO	105-60-2	0.0145135	0.0272844	0.0397415	0.0239373	0.0229209	0.025897	0.038707	0.0316843	0.0310816	0.0192149	0.0154174	0.0258371	0.0320808	0.055938	0.0557435	0.0311913	0.015774	0.028211	0.01881	0.0145574	0.0166318	0.0178537	0.0152765	0.0158924	0.0175309	0.015745	0.0178602	0.0101799	0.0143141	0.0106999	0.028341	0.0372342	0.0295563	0.0296118	0.0145474	0.0248137
(6Z)-Nonen-1-ol	Alcohol	C9H18O	35854-86-5	0.0321787	0.0281645	0.057754	0.0357151	0.030016	0.0433778	0.0570581	0.0595304	0.0455154	0.0112575	0.0147754	0.044004	0.0431611	0.0910875	0.107154	0.0698952	0.0445112	0.0420547	0.0769658	0.087811	0.108943	0.0868271	0.106442	0.119369	0.044376	0.0263736	0.050517	0.0194075	0.0240425	0.0298431	0.0834911	0.140509	0.150911	0.125185	0.0711476	0.0986339
1-Cyclopentene-1-methanol, 2-methyl-5-(1-methylethyl)-	Alcohol	C10H18O	80113-82-2	0.0129251	0.0118264	0.0244429	0.0143177	0.0137974	0.0182983	0.0193157	0.019513	0.0194011	0.0161499	0.0145318	0.0160732	0.0181563	0.0316641	0.0392078	0.0259143	0.0168725	0.0163801	0.0201005	0.0199095	0.0222121	0.0188919	0.0312784	0.0278408	0.0147003	0.012072	0.018731	0.0111205	0.0109153	0.0107413	0.0249392	0.0331322	0.0277361	0.0275935	0.0180487	0.0255728
1-Decanol	Alcohol	C10H22O	112-30-1	0.0499753	0.0599234	0.139125	0.0565603	0.101492	0.0971944	0.0850709	0.0686657	0.0782798	0.0734063	0.0552198	0.0555855	0.0984093	0.122059	0.138728	0.145285	0.0548262	0.0621315	0.037251	0.0641057	0.0527697	0.0491113	0.0552763	0.0528408	0.0532968	0.0351079	0.0639863	0.0346629	0.0365923	0.0433873	0.0665478	0.140506	0.110108	0.110933	0.0606943	0.116867
1-Dodecanol	Alcohol	C12H26O	112-53-8	0.178833	0.129568	0.189426	0.205354	0.117339	0.191965	0.325398	0.286758	0.257674	0.294296	0.268163	0.258927	0.229961	0.374612	0.48019	0.342354	0.27995	0.250319	0.323986	0.329853	0.40562	0.343689	0.435197	0.446238	0.22958	0.114143	0.239135	0.092566	0.107321	0.108465	0.317255	0.684303	0.531982	0.580231	0.262796	0.479743
1-Hexanol, 3,5,5-trimethyl-	Alcohol	C9H20O	3452-97-9	0.173465	0.18148	0.502798	0.21897	0.413917	0.334434	0.266449	0.196637	0.226162	0.187955	0.154934	0.165743	0.336613	0.357317	0.321478	0.310093	0.198205	0.233784	0.126966	0.154017	0.133774	0.141582	0.162642	0.186128	0.156219	0.157807	0.276041	0.162264	0.159601	0.188598	0.189339	0.278355	0.613283	0.224679	0.260365	0.20354
1-Hexanol, 4-methyl-	Alcohol	C7H16O	818-49-5	0.0185744	0.0117237	0.0374604	0.024101	0.0173409	0.032117	0.0345867	0.0177285	0.0279099	0.0203034	0.0116308	0.018704	0.00834055	0.0239193	0.0171276	0.00443673	0.00448374	0.00749011	0.00314167	0.0123296	0.0110416	0.0131724	0.00274787	0.00266298	0.0146306	0.0137977	0.0193674	0.016006	0.00993352	0.0124315	0.00282642	0.00418049	0.028274	0.00364668	0.0149675	0.00323029
1-Nonanol	Alcohol	C9H20O	143-08-8	0.223957	0.176011	0.508711	0.285795	0.216216	0.396977	0.569356	0.503019	0.422257	0.234019	0.211205	0.317374	0.289871	0.764808	1.18361	0.639993	0.177902	0.21883	0.512679	0.524841	0.637219	0.518677	0.695662	0.782023	0.365471	0.158264	0.321569	0.0995371	0.159138	0.155119	0.536363	0.993365	0.793367	0.783781	0.442145	0.630183
1-Nonen-4-ol	Alcohol	C9H18O	35192-73-5	1.18002	0.836532	2.29749	1.19277	1.35349	1.7653	2.22765	1.65269	1.86529	1.31888	0.952849	1.3843	1.40891	3.52801	4.16101	2.99877	1.49552	1.80556	1.18776	0.957775	1.20186	0.994725	1.90242	2.10176	1.24027	0.617676	1.38139	0.479526	0.574879	0.539746	1.77403	2.41808	2.27718	2.20937	1.2989	1.72279
1-Octanol	Alcohol	C8H18O	111-87-5	0.0220789	0.0154873	0.0451008	0.0248609	0.0267181	0.0352369	0.031229	0.0229071	0.023198	0.0199033	0.0141119	0.019352	0.027304	0.0333056	0.0488826	0.0250287	0.0209462	0.0167699	0.0365785	0.0326769	0.0292201	0.0216064	0.0411519	0.0383304	0.0217981	0.0186877	0.0250379	0.0213864	0.0167692	0.0162425	0.0375813	0.0447512	0.0554988	0.0441598	0.0262826	0.03401
1-Octen-3-ol	Alcohol	C8H16O	3391-86-4	0.91952	0.793722	2.13457	1.33595	1.85374	1.90199	0.461886	0.408401	0.430565	0.351089	0.286655	0.337307	0.373024	0.771653	0.800711	0.646951	0.367483	0.346497	0.428007	0.390665	0.453228	0.294806	0.573134	0.637013	0.304453	0.223548	0.375753	0.192792	0.214406	0.25651	0.4376	0.670503	0.523661	0.538539	0.420744	0.445541
1-Undecyn-4-ol	Alcohol	C11H20O	22127-86-2	0.0333985	0.0395612	0.110304	0.037874	0.0639285	0.0787689	0.0571801	0.0463679	0.05161	0.0622771	0.0367067	0.0375874	0.0618006	0.101245	0.0919384	0.0906329	0.0378494	0.0412797	0.0240514	0.0322585	0.0362495	0.0423179	0.0467792	0.0448895	0.0337407	0.0196362	0.0437661	0.0238311	0.0189974	0.0227091	0.0445162	0.115409	0.0897592	0.0889308	0.0365556	0.0743304
2-Decen-1-ol, (E)-	Alcohol	C10H20O	18409-18-2	0.126047	0.144744	0.34946	0.137998	0.208788	0.246085	0.207185	0.162253	0.193917	0.171468	0.13157	0.133429	0.176054	0.302497	0.33911	0.289251	0.136645	0.146591	0.0866558	0.111963	0.127798	0.115438	0.127579	0.132659	0.110939	0.0845048	0.144239	0.0780132	0.0579129	0.0714347	0.158917	0.330402	0.266154	0.260367	0.11434	0.223801
2-Furanmethanol	Alcohol	C5H6O2	98-00-0	5.70402	4.31913	7.73969	5.36278	5.50791	8.07757	2.19302	0.760791	1.146	1.5557	1.47368	0.904074	0.0292437	0.229882	0.163414	0.17361	0.0730604	0.111589	0.0704582	0.0868941	0.0683464	0.0647812	0.0823637	0.0959762	0.560481	0.341574	0.437891	0.287067	0.406654	0.277226	0.0819039	0.082361	0.128834	0.0894387	0.0615471	0.0826994
2-Hexanol	Alcohol	C6H14O	626-93-7	0.517175	0.399914	0.734054	0.495653	0.46329	0.667039	0.786981	0.322028	0.421081	0.351089	0.286655	0.480722	0.373024	0.771653	0.800711	0.646951	0.367483	0.346497	0.192016	0.881564	0.414082	0.50836	0.116021	0.165217	0.374637	0.139242	0.452354	0.170089	0.10661	0.25651	0.4376	0.670503	0.523661	0.538539	0.420744	0.445541
2-Nonen-1-ol, (E)-	Alcohol	C9H18O	31502-14-4	0.15709	0.0940576	0.239285	0.169511	0.1873	0.247414	0.0477076	0.0831098	0.013338	0.0331953	0.00710142	0.00835005	0.0310259	0.191259	0.15504	0.0505272	0.0113332	0.0121287	0.171315	0.131905	0.437673	0.645337	0.399815	0.0651901	0.0219489	0.0200199	0.0533889	0.0155889	0.0171964	0.0206819	0.0150183	0.0204049	0.0258907	0.0201769	0.0111465	0.0146285
2-Octen-1-ol, (E)-	Alcohol	C8H16O	18409-17-1	0.0514621	0.0439861	0.123725	0.064901	0.0960425	0.099341	0.0716484	0.0506148	0.0608062	0.0614016	0.04061	0.0437517	0.0693372	0.084483	0.0784872	0.0862844	0.0461463	0.0506466	0.0282092	0.0396517	0.0375439	0.0374136	0.0455216	0.0490238	0.0431849	0.0282675	0.0539642	0.0242718	0.0255425	0.028375	0.0494281	0.0753448	0.0857991	0.0643704	0.0569069	0.0608561
3-Hexyne-2,5-diol	Alcohol	C6H10O2	3031-66-1	0.0293404	0.0209795	0.0386985	0.0249939	0.0270256	0.0288881	0.022495	0.020929	0.022835	0.0219662	0.0215639	0.0218117	0.0368407	0.0631061	0.0603693	0.0444674	0.0384628	0.0318862	0.056099	0.0547604	0.0474859	0.0592377	0.053661	0.0512149	0.0375924	0.0484532	0.0463972	0.0487604	0.0408829	0.05037	0.0499718	0.0599462	0.0552621	0.0607694	0.0614632	0.0571809
3-Nonen-1-ol, (Z)-	Alcohol	C9H18O	10340-23-5	0.0766824	0.0497968	0.289113	0.508143	0.135525	0.750242	0.461886	0.408401	0.430565	0.351089	0.286655	0.337307	0.373024	0.771653	0.800711	0.646951	0.367483	0.346497	0.428007	0.390665	0.453228	0.294806	0.573134	0.637013	0.304453	0.223548	0.375753	0.192792	0.214406	0.25651	0.4376	0.670503	0.523661	0.538539	0.420744	0.445541
3-Phenylpropanol	Alcohol	C9H12O	122-97-4	0.00896202	0.0066614	0.0148308	0.00954334	0.00755881	0.0111961	0.0217204	0.0193016	0.0175148	0.0187392	0.0112627	0.0171295	0.019426	0.0451705	0.0414254	0.032243	0.0191006	0.0194469	0.0220683	0.0245934	0.0245509	0.0206302	0.0367342	0.0351315	0.0170621	0.0127106	0.0202473	0.0114756	0.0120209	0.014599	0.027919	0.0390178	0.0364912	0.0315529	0.0204583	0.0283195
5,9-Undecadien-2-ol, 6,10-dimethyl-	Alcohol	C13H24O	53837-34-6	0.00435303	0.0057143	0.0203171	0.0474176	0.00358227	0.00771322	0.00482176	0.0129802	0.00642554	0.0227218	0.00566315	0.017285	0.00564124	0.0361678	0.0197982	0.0532887	0.00809844	0.0208079	0.0408422	0.0412431	0.0438163	0.0307435	0.0378683	0.0489458	0.0405146	0.0357627	0.0449561	0.0180981	0.0211983	0.0267705	0.580905	0.00738029	2.32421	0.320523	0.02757	0.167061
6-Undecanol	Alcohol	C11H24O	23708-56-7	0.0253777	0.0367585	0.0599052	0.033026	0.0363836	0.0431925	0.0396743	0.0348058	0.0366267	0.0341186	0.0336567	0.0285929	0.0341887	0.0573018	0.0664245	0.0488496	0.0344155	0.0387955	0.0216027	0.0292539	0.0302672	0.0308448	0.0320054	0.0321119	0.0304643	0.0174629	0.0391072	0.0148987	0.017587	0.0202	0.0382848	0.0651301	0.0498403	0.0485916	0.0216844	0.0412024
7-Octen-2-ol	Alcohol	C8H16O	39546-75-3	0.0381948	0.0310412	0.0688491	0.0456778	0.067425	0.0625264	0.461886	0.408401	0.430565	0.351089	0.286655	0.337307	0.373024	0.771653	0.800711	0.646951	0.367483	0.346497	0.428007	0.390665	0.453228	0.294806	0.573134	0.637013	0.304453	0.223548	0.375753	0.192792	0.214406	0.25651	0.4376	0.670503	0.523661	0.538539	0.420744	0.445541
Benzenemethanol, .alpha.-2-propenyl-	Alcohol	C10H12O	936-58-3	0.198344	0.157196	0.272007	0.197546	0.163226	0.220084	0.332933	0.304062	0.306791	0.291999	0.211427	0.268353	0.27073	0.530994	0.591994	0.427446	0.290012	0.302467	0.346255	0.368691	0.407634	0.3211	0.584582	0.575361	0.276925	0.148979	0.305047	0.11537	0.141296	0.140405	0.458433	0.685374	0.596883	0.553711	0.328853	0.445107
Benzenemethanol, .alpha.-methyl-	Alcohol	C8H10O	98-85-1	0.0351969	0.0238529	0.0373411	0.0480704	0.0317671	0.0361573	0.0526901	0.0671711	0.0487858	0.0462879	0.0310057	0.0352359	0.0357118	0.0661885	0.0659473	0.0542198	0.0343891	0.0402887	0.0186209	0.016929	0.0178111	0.0153673	0.0199286	0.0261284	0.0178562	0.015722	0.0239104	0.0217982	0.0172061	0.016398	0.0429488	0.0589449	0.0610425	0.0387993	0.0480977	0.0428747
Benzenemethanol, 4-methyl-	Alcohol	C8H10O	589-18-4	0.116755	0.0880955	0.216631	0.114044	0.130536	0.167593	0.317496	0.232804	0.252392	0.207848	0.147628	0.209241	0.266914	0.51382	0.389176	0.469917	0.22452	0.279404	0.116625	0.10822	0.122232	0.105083	0.19445	0.227162	0.157286	0.0809232	0.144023	0.0598177	0.0746676	0.068248	0.185018	0.246601	0.231446	0.221231	0.14083	0.176906
Cyclohexanol, 1-ethenyl-	Alcohol	C8H14O	1940-19-8	0.192693	0.110087	0.367445	0.309434	0.358827	0.240375	0.0250719	0.0171526	0.0228734	0.0138433	0.0104244	0.0155293	0.00599997	0.014951	0.0179486	0.0208944	0.0781258	0.00769058	0.0907754	0.116413	0.0987896	0.0994399	0.122563	0.12825	0.0821053	0.0615568	0.110813	0.0602506	0.0656742	0.0737079	0.194615	0.122604	0.553002	0.162996	0.088904	0.133588
trans-2-Dodecen-1-ol	Alcohol	C12H24O	69064-37-5	0.0628229	0.0383221	0.140569	0.0671053	0.0461062	0.0777001	0.181741	0.107305	0.103825	0.079077	0.068161	0.0629872	0.0677634	0.153047	0.272485	0.137528	0.071225	0.0665848	0.0824853	0.0903073	0.138353	0.0855558	0.135666	0.139868	0.0627585	0.0275877	0.0687108	0.0260187	0.0344153	0.036644	0.132554	0.378347	0.254274	0.300096	0.0669915	0.23403
(3-Bromo-1-methylpropoxymethyl)benzene	Aromatics	C11H15BrO	51666-29-6	0.245978	0.121746	0.201667	0.213911	0.0931441	0.206103	0.111436	0.488127	0.386563	0.0804822	0.0731215	0.207173	0.363366	1.38309	0.783251	0.899389	0.396656	0.170781	0.38447	0.375114	0.484933	0.116486	0.56332	0.756878	0.255536	0.328917	0.508949	0.277179	0.275513	0.467967	0.490995	0.459405	0.370289	0.462305	0.6941	0.455898
1,8-Ethylenenaphthalene	Aromatics	C12H10	83-32-9	0.0120055	0.0147097	0.0155461	0.0122475	0.00721705	0.0228532	0.0412908	0.0448905	0.0390087	0.0421118	0.0335583	0.0329357	0.0266801	0.0611613	0.0777556	0.0514384	0.0354854	0.0285101	0.0480091	0.0401791	0.0574332	0.0447571	0.0647019	0.0625919	0.0229744	0.00837855	0.031973	0.00649275	0.00847765	0.00986754	0.0460151	0.0966689	0.0690066	0.0790613	0.040248	0.0639076
3,4-Dimethoxytoluene	Aromatics	C9H12O2	494-99-5	0.12022	0.0372609	0.0764516	0.151073	0.101105	0.164571	0.0566905	0.0191952	0.0224903	0.0396019	0.0249898	0.0211472	0.0174173	0.0549309	0.0491244	0.0287013	0.0156605	0.0170328	0.0473645	0.0566072	0.0772948	0.107782	0.0784107	0.0365496	0.0100059	0.00386261	0.010903	0.00322341	0.0049449	0.00332749	0.00352632	0.00746331	0.0244384	0.00596834	0.0240816	0.0043033
Benzene, (2-methoxyethyl)-	Aromatics	C9H12O	3558-60-9	0.0379445	0.0333111	0.0724783	0.0397009	0.0371816	0.0553227	0.0731745	0.0539045	0.0602276	0.0465292	0.0342615	0.0463884	0.0626356	0.113049	0.138557	0.133212	0.0672478	0.083835	0.0412803	0.0388622	0.0422235	0.0365338	0.059605	0.069528	0.0452371	0.0173999	0.0478666	0.0142373	0.0225746	0.0157713	0.0813842	0.077903	0.0703106	0.0685953	0.0567761	0.0777479
Benzene, 1,2,3,5-tetramethyl-	Aromatics	C10H14	527-53-7	0.0648953	0.0548393	0.100802	0.0683803	0.0802874	0.0845877	0.0852206	0.0781832	0.095907	0.0863375	0.0584042	0.0617094	0.056898	0.145873	0.0920542	0.134861	0.0600164	0.0751739	0.0264827	0.0348441	0.034653	0.0264548	0.0414461	0.040765	0.0381779	0.0291982	0.0434318	0.0148475	0.0220125	0.017744	0.0596754	0.0534171	0.0518645	0.0560472	0.0364716	0.0548023
Benzene, 1,2,3-trimethyl-	Aromatics	C9H12	526-73-8	0.0344921	0.0337158	0.0463599	0.0343915	0.0480077	0.0412771	0.0479428	0.0334986	0.0414167	0.0380437	0.0331256	0.0372721	0.0399479	0.076075	0.0506382	0.0518543	0.0466956	0.0446417	0.0307521	0.0295802	0.0286742	0.0255789	0.0364216	0.0394209	0.0899815	0.0235762	0.0356722	0.0197909	0.0201221	0.0239747	0.0825831	0.0418043	0.0421099	0.114897	0.0303633	0.0366313
Benzene, 1,2,4,5-tetramethyl-	Aromatics	C10H14	95-93-2	0.0648953	0.0548393	0.100802	0.0683803	0.0802874	0.0845877	0.0852206	0.0781832	0.095907	0.0863375	0.0584042	0.0617094	0.056898	0.145873	0.0920542	0.134861	0.0600164	0.0751739	0.0264827	0.0348441	0.034653	0.0264548	0.0414461	0.040765	0.0381779	0.0291982	0.0434318	0.0148475	0.0220125	0.017744	0.0596754	0.0534171	0.0518645	0.0560472	0.0364716	0.0548023
Benzene, 1,3-dimethyl-	Aromatics	C8H10	108-38-3	0.0716863	0.0668597	0.0376257	0.0424257	0.0315609	0.031335	0.0315669	0.0558448	0.0763508	0.144975	0.0553129	0.0642359	0.0530874	0.0792987	0.0236814	0.0602057	0.0438267	0.0542238	0.0344644	0.0494846	0.0433284	0.0291757	0.0373399	0.0285936	0.0556425	0.0515696	0.0532037	0.029934	0.0424436	0.0341968	0.0191848	0.0163489	0.012415	0.0189763	0.0303594	0.0219927
Benzene, 1-ethyl-3,5-dimethyl-	Aromatics	C10H14	934-74-7	0.0221391	0.0219081	0.0408118	0.0250464	0.0325241	0.0307818	0.0689034	0.0659006	0.0397035	0.050988	0.0348	0.0381588	0.0348687	0.0704846	0.0492497	0.0604626	0.0381117	0.0452075	0.016958	0.0193316	0.0179669	0.0163908	0.0226052	0.023487	0.0180517	0.0137806	0.0211888	0.0100656	0.0107576	0.0136327	0.023758	0.0335876	0.0304762	0.0362516	0.021847	0.0292131
Benzene, 2-ethyl-1,4-dimethyl-	Aromatics	C10H14	1758-88-9	0.0133648	0.0102453	0.0178105	0.0119828	0.0165645	0.00659067	0.0152761	0.0135231	0.0166213	0.0117298	0.0102919	0.01121	0.0107736	0.0235913	0.0166306	0.0182002	0.0109647	0.0145962	0.00697662	0.00882311	0.00809755	0.00710269	0.00848566	0.00936593	0.0076677	0.00367772	0.00932276	0.00418387	0.0025279	0.00415869	0.00928377	0.0132946	0.0110128	0.0107004	0.00715363	0.00998534
Benzene, [1-[[1-(1-methylethyl)-3-butenyl]oxy]ethyl]-, [S-(R*,R*)]-	Aromatics	C15H22O	98088-51-8	0.150996	0.114156	0.245018	0.187033	0.202232	0.246677	0.00670345	0.0163231	0.00832593	0.019104	0.00525557	0.0135618	0.00621722	0.0450002	0.020152	0.0661129	0.00823973	0.0196005	0.0167775	0.0230099	0.00210172	0.00198469	0.0234187	0.00989153	0.0295149	0.027857	0.0556133	0.0184342	0.0183937	0.0199644	0.463735	0.00896277	2.16138	0.23933	0.0243765	0.143155
Butylated Hydroxytoluene	Aromatics	C15H24O	128-37-0	0.00473884	0.00338143	0.0068525	0.00455468	0.00255727	0.00585135	0.0178008	0.0484341	0.00775702	0.00595371	0.0104406	0.00545238	0.0309051	0.133283	0.0469939	0.0766177	0.0390336	0.0222886	0.0123015	0.0102552	0.0109298	0.00276337	0.0129544	0.0162561	0.00711236	0.00885664	0.0311539	0.0200178	0.0111461	0.0314648	0.0342168	0.0141294	0.0393016	0.0236993	0.0310359	0.0377268
Naphthalene, 1-methyl-	Aromatics	C11H10	90-12-0	0.0402693	0.0328767	0.0762894	0.0451428	0.055327	0.0539223	0.0238187	0.0166642	0.0197873	0.0178691	0.0105532	0.0162579	0.0144389	0.034957	0.0408067	0.0434578	0.0166606	0.038787	0.00608499	0.00622016	0.00858121	0.00608278	0.0108221	0.0125634	0.00693283	0.00206116	0.00597837	0.00285832	0.000846008	0.0016455	0.00977236	0.0237891	0.0178806	0.0128576	0.00668625	0.0117561
Naphthalene, 2-methyl-	Aromatics	C11H10	91-57-6	0.0402693	0.0328767	0.0762894	0.0451428	0.055327	0.0539223	0.0238187	0.0166642	0.0197873	0.0178691	0.0105532	0.0162579	0.0144389	0.034957	0.0408067	0.0434578	0.0166606	0.038787	0.00608499	0.00622016	0.00858121	0.00608278	0.0108221	0.0125634	0.00693283	0.00206116	0.00597837	0.00285832	0.000846008	0.0016455	0.00977236	0.0237891	0.0178806	0.0128576	0.00668625	0.0117561
Styrene	Aromatics	C8H8	100-42-5	0.104838	0.0772787	0.0176671	0.0157333	0.0201475	0.016573	0.0267863	0.0449859	0.0441523	0.0371363	0.0360079	0.0415831	0.021925	0.0744028	0.0440169	0.0612676	0.0258315	0.0358403	0.031509	0.0439677	0.0383577	0.0350857	0.0234187	0.0173658	0.106612	0.0938346	0.105034	0.0506861	0.0575948	0.0550467	0.177724	0.0249148	0.742414	0.111273	0.0309495	0.0723704
Toluene	Aromatics	C7H8	108-88-3	0.0418545	0.0602245	0.0272835	0.0285928	0.042383	0.0371681	0.0137834	0.069458	0.0601202	0.0452805	0.0219449	0.0883727	0.0524415	0.0336784	0.0109747	0.0186911	0.0459749	0.0525755	0.0185549	0.0503719	0.0436506	0.020185	0.0301998	0.0159587	0.0113605	0.0172203	0.0215726	0.0247015	0.0167023	0.0160123	0.00370833	0.00401777	0.00443133	0.00314787	0.0177559	0.00656369
o-Xylene	Aromatics	C8H10	95-47-6	0.0206705	0.0208374	0.0116512	0.0126331	0.0138738	0.00919987	0.0103169	0.0161059	0.0217179	0.0346566	0.0163629	0.0187911	0.0227766	0.0277639	0.0139793	0.0236372	0.0191289	0.0233484	0.0148174	0.0185269	0.0164458	0.0132381	0.0140968	0.0114905	0.0174735	0.0144712	0.0203667	0.00923246	0.0120581	0.0121434	0.00798368	0.00900438	0.0075524	0.00972085	0.0083355	0.0111788
p-Xylene	Aromatics	C8H10	106-42-3	0.0716863	0.0668597	0.0376257	0.0424257	0.0315609	0.031335	0.0315669	0.0558448	0.0763508	0.144975	0.0553129	0.0642359	0.0530874	0.0792987	0.0236814	0.0602057	0.0438267	0.0542238	0.0344644	0.0494846	0.0433284	0.0291757	0.0373399	0.0285936	0.0556425	0.0515696	0.0532037	0.029934	0.0424436	0.0341968	0.0191848	0.0163489	0.012415	0.0189763	0.0303594	0.0219927
1,3-Benzenediol, 4,5-dimethyl-	Phenol	C8H10O2	527-55-9	0.399007	0.266664	0.529341	0.415095	0.257123	0.42272	0.969954	0.855892	0.747794	0.790929	0.626109	0.599958	0.477283	1.16916	1.48267	0.966539	0.555168	0.572264	0.901919	0.863279	0.903493	0.834142	1.22632	1.21262	0.405988	0.132522	0.533888	0.109598	0.176054	0.212276	0.850047	1.83721	1.31121	1.51316	0.754943	1.18204
2-Naphthalenol	Phenol	C10H8O	135-19-3	0.0148665	0.0126641	0.0193466	0.0124054	0.00745088	0.0160003	0.00938495	0.0224633	0.0225075	0.00827275	0.0130315	0.0175325	0.0223957	0.0648656	0.0533857	0.0375963	0.0258328	0.0098156	0.0374888	0.0286227	0.0323156	0.0109048	0.0415059	0.0556424	0.0200029	0.0221962	0.0298626	0.0224538	0.023444	0.0292776	0.03035	0.043166	0.0123184	0.0252559	0.0407386	0.031127
2-methoxy-Phenol	Phenol	C7H8O2	90-05-1	0.354782	0.266089	0.676313	0.344537	0.399647	0.507125	0.608895	0.455575	0.503697	0.505506	0.392308	0.528366	0.975479	2.08754	2.04429	1.94342	0.963903	0.264008	0.329885	0.301317	0.326781	0.284473	0.571507	0.633222	0.353274	0.146232	0.380742	0.118794	0.136433	0.129245	0.53264	0.718792	0.685939	0.664709	0.40033	0.52306
Catechol	Phenol	C6H6O2	120-80-9	0.0298691	0.0210398	0.0415093	0.0256427	0.0300912	0.0310721	0.0261019	0.0245529	0.0271538	0.0258138	0.0262396	0.0234008	0.0380879	0.0478803	0.054557	0.0420315	0.0399842	0.032131	0.0516535	0.0487319	0.0480929	0.0497696	0.0477503	0.0493503	0.0322176	0.0405705	0.0447023	0.0259661	0.0368346	0.0316813	0.045481	0.0499722	0.0452079	0.0537477	0.0529664	0.0472454
Phenol, 2,3,6-trimethyl-	Phenol	C9H12O	2416-94-6	0.0359619	0.0304166	0.0555337	0.0387636	0.0316423	0.0407449	0.0671003	0.0574052	0.0576215	0.0524343	0.0384095	0.0483822	0.0515197	0.100541	0.105825	0.080109	0.0569893	0.0587771	0.0654293	0.0685587	0.0788141	0.0592887	0.109354	0.108132	0.0499648	0.0276022	0.0554777	0.0224603	0.0255642	0.0252219	0.0846117	0.125894	0.114853	0.101876	0.0635524	0.0869905
Phenol, 3-nitro-	Phenol	C6H5NO3	554-84-7	0.00843715	0.00550035	0.0105555	0.00773016	0.00497675	0.00855896	0.00586436	0.0133863	0.0140512	0.00417415	0.00177603	0.00958768	0.0127104	0.0269985	0.0239513	0.0216123	0.010911	0.00415567	0.0197403	0.015482	0.018617	0.00706156	0.0199114	0.0262029	0.0113375	0.0116993	0.0162788	0.0111007	0.0124054	0.0144936	0.0152743	0.0258008	0.0105346	0.0182196	0.0202777	0.0162418
Phenol, 4-(3-hydroxy-1-propenyl)-2-methoxy-	Phenol	C10H12O3	458-35-5	5.68173	3.89206	7.57588	6.01216	3.66401	6.06386	13.9523	12.3498	10.8252	9.96305	7.97583	7.77517	6.88355	14.8151	21.1354	12.33	8.35415	7.47948	11.3449	10.9819	15.8616	10.5908	17.4038	14.9635	5.74902	2.27928	7.76068	1.61731	2.51988	3.15185	11.9066	22.0192	15.0593	18.2895	9.39908	14.3
Phenol, 4-methyl-2-nitro-	Phenol	C7H7NO3	119-33-5	0.0603378	0.0672968	0.122847	0.0610603	0.047291	0.0811879	0.122241	0.123995	0.125206	0.112684	0.0832396	0.112191	0.121711	0.224713	0.275976	0.175006	0.123893	0.128113	0.137683	0.145691	0.14511	0.127918	0.226761	0.236642	0.101521	0.0616551	0.115452	0.0476147	0.057097	0.0443385	0.175879	0.264835	0.239905	0.212308	0.135028	0.179118
p-Menth-2-en-7-ol, cis-	Phenol	C10H18O	19898-86-3	0.0200394	0.04176	0.0406244	0.0497056	0.158839	0.017494	0.0256577	0.0214895	0.0209807	0.0146356	0.011879	0.0134531	0.0107343	0.0258058	0.028845	0.0124847	0.0130587	0.00820824	0.0272311	0.0301397	0.0270668	0.0219298	0.0419181	0.0541824	0.0303898	0.0173181	0.0388183	0.00806757	0.0155616	0.0160252	0.024526	0.029117	0.0372859	0.0348114	0.0184465	0.0289264
2-Nonenenitrile	Nitrogen compounds	C9H15N	29127-83-1	0.0157691	0.0126766	0.0242456	0.0172522	0.0177133	0.0183286	0.0251817	0.0271016	0.0186447	0.017212	0.0123286	0.0164646	0.0176278	0.0372883	0.0438551	0.0282254	0.0184513	0.0222968	0.0236566	0.0273397	0.0281165	0.0209351	0.0413291	0.04014	0.0191817	0.00959836	0.0180195	0.00771264	0.0087566	0.0093585	0.0281174	0.0373117	0.036515	0.0358545	0.0200227	0.0266359
Acetonitrile, 2,2'-iminobis-	Nitrogen compounds	C4H5N3	628-87-5	0.60096	0.444409	1.13692	0.596047	0.678992	0.864494	1.11362	0.803888	0.89751	0.706227	0.534326	0.71673	0.594384	1.37791	1.62521	1.13985	0.666996	0.709472	0.56556	0.532661	0.650487	0.499866	0.995711	1.10162	0.626207	0.360533	0.669146	0.288255	0.270627	0.32834	0.957475	1.28005	1.17532	1.15154	0.752054	0.910796
Dodecanenitrile	Nitrogen compounds	C12H23N	2437-25-4	0.0451152	0.0334352	0.0530093	0.0496293	0.028691	0.0437659	0.0924095	0.0775105	0.0724917	0.0783079	0.062936	0.0646009	0.0592936	0.115637	0.150073	0.0975091	0.0683689	0.0631887	0.0996439	0.0952248	0.111775	0.0934143	0.127962	0.131061	0.0502853	0.0180629	0.0657928	0.0161953	0.0204417	0.0253346	0.0904719	0.231908	0.161691	0.171555	0.0790241	0.13948
Benzene, (methylthio)-	Sulfur compounds	C7H8S	100-68-5	0.762933	0.654812	1.60362	0.834929	0.988234	1.23641	2.10111	1.62617	1.75489	1.29661	1.17318	1.40277	0.474072	2.18036	2.36584	1.13302	0.419947	0.537915	0.815087	0.739648	0.807852	0.686361	1.36007	1.54462	0.849994	0.468369	0.911939	0.343139	0.425773	0.379052	1.17179	1.6867	1.62142	1.5881	0.883523	1.25502
Hexathiane	Sulfur compounds	S6	13798-23-7	0.0131731	0.00821768	0.0192758	0.0140665	0.0135703	0.0165388	0.00741694	0.0257605	0.0165053	0.00647548	0.00404458	0.0103651	0.0141061	0.0914652	0.0343275	0.0548706	0.0193161	0.0180796	0.0166694	0.0123209	0.0156481	0.00702039	0.0190114	0.0194254	0.0108182	0.0102838	0.0114899	0.00798768	0.0103516	0.0128719	0.0200094	0.0198274	0.0449621	0.0194527	0.0227362	0.0217698
Propanoic acid, 3-(methylthio)-	Sulfur compounds	C4H8O2S	646-01-5	0.0137189	0.0117248	0.0318438	0.0112963	0.0186939	0.0183443	0.0241531	0.0193767	0.0185495	0.0132675	0.0151722	0.0185902	0.0330094	0.0681231	0.0644891	0.0635627	0.0311085	0.0509739	0.00694562	0.0042889	0.00787435	0.0065702	0.0105346	0.0115213	0.0147465	0.00335432	0.0168956	0.00632166	0.00253281	0.00458893	0.0129722	0.012088	0.0118139	0.0154536	0.0089789	0.00871594
Cyclobutanecarboxylic acid chloride	Halogenated hydrocarbons	C5H7ClO	5006-22-4	20.6307	16.1082	28.7933	18.4591	20.044	30.1158	8.64866	3.33256	5.42737	7.19756	6.05625	4.67632	0.0278192	0.183603	0.161803	0.142084	0.064521	0.0951818	0.0830653	0.0925204	0.109383	0.129287	0.117636	0.0921279	2.41819	1.56371	1.96181	1.18083	1.95822	1.31313	0.069313	0.0840993	0.0990825	0.0823328	0.0549192	0.0707854
Nonane, 1-iodo-	Halogenated hydrocarbons	C9H19I	4282-42-2	0.0110092	0.0115223	0.0307517	0.0130941	0.0153844	0.0187159	0.0172473	0.0145946	0.0166625	0.013387	0.0115741	0.0121988	0.020217	0.0232988	0.0264491	0.0310152	0.0177746	0.0193409	0.0104625	0.0174402	0.0168331	0.0090424	0.01157	0.0112143	0.0126183	0.00648205	0.0153059	0.00481497	0.00555223	0.00665189	0.0142114	0.0304136	0.0204528	0.0253334	0.00828855	0.0206539
2-Methylbutanoic anhydride	Others	C10H18O3	1468-39-9	0.0938744	0.113345	0.153896	0.100495	0.106744	0.114166	0.148696	0.125994	0.128086	0.129594	0.0899505	0.118756	0.107831	0.208283	0.215383	0.123412	0.117183	0.128413	0.119213	0.151772	0.151706	0.14155	0.252096	0.292814	0.119239	0.0521943	0.113617	0.0605254	0.0997806	0.068535	0.25693	0.243976	0.243197	0.222486	0.141703	0.154152
2-methylprop-2-enoyl 2-methylprop-2-enoate	Others	C8H10O3	760-93-0	0.0142211	0.0144776	0.0357235	0.0173043	0.0305931	0.0248113	0.0205084	0.0159624	0.0184759	0.0154526	0.0135104	0.014026	0.0180447	0.028929	0.02487	0.0229628	0.0171782	0.0186475	0.0116401	0.0137901	0.0126261	0.0134203	0.0135785	0.0164228	0.0136085	0.015185	0.0228012	0.0150656	0.0138066	0.0180122	0.0173957	0.0232354	0.0224818	0.0200766	0.0173683	0.0182141
(E)-2-Heptenal	Aldehyde	C7H12O	18829-55-5	0.0453863	0.0276787	0.0568924	0.0356459	0.0429033	0.0412652	0.0523757	0.0277085	0.0421425	0.0315234	0.0288111	0.0323173	0.0306015	0.0632863	0.0468558	0.0429932	0.0305251	0.0327385	0.0183489	0.019701	0.0169714	0.0151595	0.0189288	0.0208992	0.0238989	0.0291424	0.0263201	0.0206816	0.0251486	0.0251279	0.0234276	0.0226852	0.0531071	0.0283335	0.0188366	0.0223913
(E)-2-Octenal	Aldehyde	C8H14O	2548-87-0	0.0209664	0.0218108	0.0718523	0.0268041	0.0432064	0.0501847	0.0396968	0.0217047	0.0339316	0.0305822	0.0254109	0.0273905	0.0384615	0.0384705	0.036903	0.0490573	0.0219186	0.0379461	0.0152004	0.017409	0.016472	0.01679	0.019329	0.0217725	0.0190669	0.019386	0.0307396	0.019615	0.0196926	0.0229683	0.0228929	0.0339755	0.033983	0.028783	0.0283022	0.0246434
(Z)-2-Heptenal	Aldehyde	C7H12O	57266-86-1	0.0453863	0.0276787	0.0568924	0.0356459	0.0429033	0.0412652	0.0523757	0.0277085	0.0421425	0.0315234	0.0288111	0.0323173	0.0306015	0.0632863	0.0468558	0.0429932	0.0305251	0.0327385	0.0183489	0.019701	0.0169714	0.0151595	0.0189288	0.0208992	0.0238989	0.0291424	0.0263201	0.0206816	0.0251486	0.0251279	0.0234276	0.0226852	0.0531071	0.0283335	0.0188366	0.0223913
(Z,Z)-3,6-Nonadienal	Aldehyde	C9H14O	21944-83-2	0.30018	0.123735	0.563438	0.226987	0.320742	0.420374	0.527997	0.375838	0.422628	0.461171	0.354969	0.326228	0.743316	1.59215	1.53955	1.45818	0.725327	1.05691	0.311525	0.265439	0.3362	0.283729	0.49518	0.55523	0.162831	0.156229	0.213163	0.126285	0.146966	0.143535	0.479415	0.638528	0.45116	0.573936	0.338861	0.451192
2,6-Nonadienal, (E,E)-	Aldehyde	C9H14O	17587-33-6	0.02462	0.0194922	0.124254	0.0975148	0.0614403	0.0857797	0.461886	0.408401	0.430565	0.351089	0.286655	0.337307	0.373024	0.771653	0.800711	0.646951	0.367483	0.346497	0.428007	0.390665	0.453228	0.294806	0.573134	0.637013	0.304453	0.223548	0.375753	0.192792	0.214406	0.25651	0.4376	0.670503	0.523661	0.538539	0.420744	0.445541
2,6-Nonadienal, (E,Z)-	Aldehyde	C9H14O	557-48-2	0.02462	0.0194922	0.124254	0.0975148	0.0614403	0.0857797	0.461886	0.408401	0.430565	0.351089	0.286655	0.337307	0.373024	0.771653	0.800711	0.646951	0.367483	0.346497	0.428007	0.390665	0.453228	0.294806	0.573134	0.637013	0.304453	0.223548	0.375753	0.192792	0.214406	0.25651	0.4376	0.670503	0.523661	0.538539	0.420744	0.445541
2-Decenal, (Z)-	Aldehyde	C10H18O	2497-25-8	0.124974	0.123218	0.210652	0.167923	0.109365	0.164536	0.273116	0.230175	0.235491	0.225361	0.160286	0.204982	0.197013	0.403134	0.489499	0.332338	0.217554	0.222991	0.253121	0.26975	0.295132	0.236264	0.422416	0.420675	0.204068	0.100166	0.232482	0.0767743	0.0994805	0.0879666	0.335778	0.519623	0.432993	0.413177	0.239353	0.332057
2-Hexenal	Aldehyde	C6H10O	505-57-7	11.0377	7.94701	14.2035	9.76506	9.76685	14.5011	4.40837	1.73031	2.7501	3.61515	3.0958	2.37559	0.0292437	0.229882	0.163414	0.17361	0.0730604	0.111589	0.0704582	0.0868941	0.0683464	0.0647812	0.0823637	0.0959762	1.30656	0.835329	1.06848	0.641218	1.04117	0.690046	0.0819039	0.082361	0.128834	0.0894387	0.0615471	0.0826994
2-Hexenal, (E)-	Aldehyde	C6H10O	6728-26-3	11.0377	7.94701	14.2035	9.76506	9.76685	14.5011	4.40837	1.73031	2.7501	3.61515	3.0958	2.37559	0.0292437	0.229882	0.163414	0.17361	0.0730604	0.111589	0.0704582	0.0868941	0.0683464	0.0647812	0.0823637	0.0959762	1.30656	0.835329	1.06848	0.641218	1.04117	0.690046	0.0819039	0.082361	0.128834	0.0894387	0.0615471	0.0826994
2-Isopropyl-5-methylhex-2-enal	Aldehyde	C10H18O	35158-25-9	0.516556	0.41397	0.98909	0.527352	0.548221	0.754147	0.932602	0.70232	0.790326	0.613317	0.438045	0.609287	0.662045	1.65262	1.78004	1.45589	0.72965	0.918655	0.531144	0.497185	0.569745	0.480918	0.845684	0.940329	0.598325	0.26991	0.641877	0.24685	0.299743	0.285862	0.804938	1.09719	0.966561	0.964045	0.579561	0.761211
3-(4-Hydroxyphenyl)propanal	Aldehyde	C9H10O2	20238-83-9	0.365388	0.2411	0.409912	0.38789	0.220679	0.373935	0.706457	0.615097	0.546068	0.624635	0.526739	0.397803	0.372721	0.709107	1.09739	0.591708	0.433946	0.402855	0.703102	0.570493	0.831734	0.548235	0.928131	0.94292	0.311296	0.144237	0.41268	0.116152	0.166266	0.206451	0.667288	1.4372	0.985475	1.10457	0.5756	0.87831
3-MethoxycinnamAldehyde	Aldehyde	C10H10O2	56578-36-0	0.517175	0.399914	0.734054	0.495653	0.46329	0.667039	0.0272551	0.0224755	0.0434342	0.0147054	0.111437	0.0337799	0.179202	0.220401	0.35634	0.0985506	0.217736	0.481407	0.428007	0.390665	0.453228	0.294806	0.573134	0.637013	0.304453	0.223548	0.375753	0.192792	0.214406	0.25651	0.4376	0.670503	0.523661	0.538539	0.420744	0.445541
4-Nonenal, (E)-	Aldehyde	C9H16O	2277-16-9	0.0545323	0.0475698	0.112459	0.0530394	0.0687296	0.0857393	0.138159	0.073868	0.0818816	0.0627642	0.0709191	0.0742544	0.169667	0.354409	0.343609	0.320037	0.1677	0.239069	0.0618865	0.0560586	0.0647204	0.0554023	0.0889578	0.100099	0.0687964	0.0386464	0.072703	0.0294033	0.0281406	0.0318439	0.0876693	0.123748	0.11358	0.115627	0.0638475	0.0929967
6-Nonenal, (Z)-	Aldehyde	C9H16O	2277-19-2	1.28599	0.999708	2.51779	1.32025	1.39761	1.93567	2.41492	1.79229	2.02957	1.47361	1.06524	1.49828	1.60852	3.8228	4.52892	3.25955	1.67365	2.04188	1.25377	1.15932	1.34587	1.12567	2.0743	2.31885	1.40568	0.711329	1.50516	0.551549	0.664874	0.636019	1.94754	2.65759	2.40356	2.38985	1.39906	1.86318
AcetAldehyde, (3,3-dimethylcyclohexylidene)-, (Z)-	Aldehyde	C10H16O	26532-24-1	0.109834	0.0343071	0.0706218	0.136576	0.105162	0.151958	0.0529576	0.0171145	0.430565	0.0369426	0.0233911	0.337307	0.373024	0.771653	0.800711	0.646951	0.367483	0.346497	0.428007	0.390665	0.453228	0.294806	0.573134	0.637013	0.304453	0.223548	0.375753	0.192792	0.214406	0.25651	0.4376	0.670503	0.523661	0.538539	0.420744	0.445541
BenzAldehyde, 3,4-dimethoxy-	Aldehyde	C9H10O3	120-14-9	0.0517909	0.0341455	0.0664487	0.0553115	0.0329181	0.0535981	0.122112	0.108975	0.0948338	0.100808	0.0729435	0.0768233	0.0624447	0.149571	0.182708	0.124819	0.0748015	0.0669498	0.112296	0.0945279	0.141202	0.105107	0.154412	0.155455	0.0512507	0.0233937	0.0682134	0.014935	0.0203886	0.0229608	0.107256	0.234145	0.167514	0.154016	0.0970433	0.121847
BenzeneacetAldehyde	Aldehyde	C8H8O	122-78-1	0.15337	0.0176179	0.0346925	0.123006	0.0272458	0.0500453	0.264042	0.033021	0.113001	0.0936787	0.0533895	0.0619584	0.159901	0.198508	0.551212	0.436775	0.253624	0.166808	0.08606	0.153001	0.0535881	0.0551203	0.256789	0.255582	0.115922	0.0523122	0.146591	0.0353662	0.0573831	0.0427091	0.185807	0.265177	0.381392	0.190106	0.0837442	0.196789
Butanal, 3,3-dimethyl-2-oxo-, hemihydrate	Aldehyde	C6H10O2	77572-68-0	2.14804	1.53354	2.77714	1.91937	1.86413	2.72067	0.94806	0.277524	0.489593	0.65505	0.550473	0.402882	0.0271779	0.182646	0.162648	0.155164	0.0711695	0.109024	0.0704582	0.0868941	0.0683464	0.0647812	0.0823637	0.0959762	0.210626	0.109399	0.166199	0.0927086	0.169902	0.0968465	0.0760998	0.0920611	0.108231	0.0901023	0.0603908	0.077805
Hexanal	Aldehyde	C6H12O	66-25-1	2.47216	1.54337	2.79967	3.14556	2.05966	3.63125	1.30543	0.448372	0.600054	0.976358	0.896829	0.69213	0.0271779	0.182646	0.162648	0.155164	0.0711695	0.109024	0.0704582	0.0868941	0.0683464	0.0647812	0.0823637	0.0959762	0.263694	0.192557	0.444851	0.221359	0.166618	0.0342166	0.0760998	0.0920611	0.108231	0.0901023	0.0603908	0.077805
Lilac Aldehyde C	Aldehyde	C10H16O2	53447-48-6	0.13178	0.0726138	0.19474	0.113277	0.0933411	0.137185	0.392331	0.354691	0.291251	0.158971	0.150923	0.224608	0.210525	0.54778	0.851708	0.46185	0.130745	0.152968	0.380564	0.395662	0.467602	0.381556	0.593967	0.571268	0.228506	0.121805	0.24439	0.0773683	0.116359	0.116126	0.478475	0.822125	0.883801	0.753965	0.394705	0.575644
Lilac Aldehyde D	Aldehyde	C10H16O2	53447-47-5	0.13178	0.0726138	0.19474	0.113277	0.0933411	0.137185	0.392331	0.354691	0.291251	0.158971	0.150923	0.224608	0.210525	0.54778	0.851708	0.46185	0.130745	0.152968	0.380564	0.395662	0.467602	0.381556	0.593967	0.571268	0.228506	0.121805	0.24439	0.0773683	0.116359	0.116126	0.478475	0.822125	0.883801	0.753965	0.394705	0.575644
OxiranecarboxAldehyde, 3-methyl-3-(4-methyl-3-pentenyl)-	Aldehyde	C10H16O2	16996-12-6	0.471162	0.3834	0.737067	0.505531	0.42953	0.565264	0.874812	0.726579	0.734865	0.668176	0.499203	0.640021	0.661254	1.27092	1.54309	1.01855	0.703245	0.729186	0.836916	0.876633	0.950795	0.753599	1.38982	1.38227	0.475795	0.224551	0.589572	0.182427	0.229941	0.255045	1.04657	1.5883	1.47311	1.29708	0.80719	1.0689
cis-4-Decenal	Aldehyde	C10H18O	21662-09-9	0.517175	0.399914	0.734054	0.495653	0.46329	0.667039	0.461886	0.408401	0.430565	0.351089	0.286655	0.337307	0.373024	0.771653	0.800711	0.646951	0.367483	0.346497	0.039822	0.0377941	0.453228	0.294806	0.0978433	0.053841	0.304453	0.223548	0.375753	0.192792	0.214406	0.25651	0.4376	0.670503	0.523661	0.538539	0.420744	0.445541
(2E)-2-(Acetylhydrazono)propanoic acid	Acid	C5H8N2O3	64096-81-7	0.0237877	0.0279426	0.0488698	0.0248083	0.0249256	0.0366504	0.0562503	0.0484725	0.0459618	0.0417181	0.0345772	0.0249652	0.0358062	0.0683624	0.0780185	0.0612136	0.0344417	0.0359274	0.0196106	0.0236069	0.0352194	0.0298555	0.0389	0.0264022	0.0262591	0.012672	0.0226678	0.0124045	0.0133194	0.0145643	0.0582705	0.105264	0.0817362	0.100691	0.0270458	0.0757402
2-Hexenoic Acid, (E)-	Acid	C6H10O2	13419-69-7	0.106132	0.0936022	0.222589	0.158318	0.217438	0.222371	0.00984505	0.00237231	0.00734535	0.00409147	0.0021144	0.0044048	0.0153398	0.0431111	0.0383098	0.0452954	0.017373	0.0241415	0.0492279	0.0681049	0.0575871	0.0556601	0.053875	0.0540495	0.0077619	0.00434218	0.0448319	0.00380537	0.00904106	0.0040354	0.175094	0.0358425	0.740045	0.110798	0.0318477	0.0748949
2-Propenoic Acid, 3-phenyl-	Acid	C9H8O2	621-82-9	0.099491	0.0778305	0.121585	0.0994138	0.108174	0.125444	0.012858	0.20327	0.0867067	0.075505	0.00827358	0.0426375	0.0395728	0.607777	0.16954	0.302731	0.0881874	0.126979	0.0456794	0.0539017	0.0521617	0.0338338	0.0587133	0.0588727	0.0378095	0.0350645	0.0551113	0.0375209	0.0417229	0.0370284	0.128336	0.00476018	0.293657	0.0841297	0.0707978	0.121855
9-Oxononanoic Acid	Acid	C9H16O3	2553-17-5	0.0218451	0.0146894	0.0283683	0.024254	0.0149435	0.0228506	0.0487133	0.0441897	0.0394964	0.0425172	0.0350702	0.0343032	0.0330353	0.0642019	0.080754	0.0565645	0.0390394	0.0347029	0.0535762	0.052346	0.0619796	0.0489198	0.0697856	0.0729358	0.0287447	0.0124192	0.0344371	0.0144738	0.0137225	0.0176463	0.0504305	0.102281	0.0799456	0.0889114	0.0407614	0.072337
Octanoic Acid	Acid	C8H16O2	124-07-2	0.130243	0.104195	0.294021	0.185837	0.127191	0.235159	0.314142	0.282888	0.229043	0.143158	0.121639	0.182045	0.161999	0.416559	0.634614	0.347978	0.101089	0.131362	0.289724	0.295975	0.355794	0.298895	0.464611	0.434912	0.232157	0.0850088	0.18516	0.0552022	0.0830073	0.0796436	0.367244	0.628205	0.673635	0.587488	0.311348	0.44716
Propanoic Acid, 2-oxo-	Acid	C3H4O3	127-17-3	0.24314	0.190341	0.349898	0.269164	0.224522	0.274461	0.415044	0.377536	0.386089	0.354394	0.25605	0.330746	0.333813	0.60717	0.726452	0.528532	0.354259	0.370034	0.429838	0.449457	0.496956	0.382744	0.669849	0.72342	0.323398	0.164789	0.356139	0.131333	0.159452	0.153969	0.556969	0.791719	0.758415	0.637178	0.406435	0.559087
Undecylenic Acid	Acid	C11H20O2	112-38-9	0.02572	0.0230091	0.0544511	0.0254843	0.0261584	0.0389937	0.0405662	0.0389071	0.0199988	0.0457592	0.018928	0.0220977	0.0166264	0.0410479	0.0426103	0.0648547	0.0145713	0.0241715	0.0210782	0.0233487	0.0327491	0.0261962	0.0319508	0.0253386	0.023227	0.0120325	0.024197	0.0100195	0.0127631	0.0148839	0.321646	0.0108115	1.2395	0.22692	0.0348343	0.144936
trans-Cinnamic Acid	Acid	C9H8O2	140-10-3	0.000794244	0.000747895	0.00905597	0.00114399	0.0012512	0.0025482	0.00327388	0.00895395	0.00476156	0.0099348	0.00225621	0.00733856	0.00277886	0.0268389	0.0111876	0.0392639	0.00499901	0.00881096	0.0334153	0.0347778	0.0374806	0.0282134	0.0334422	0.0405406	0.0348295	0.0299212	0.04458	0.0181906	0.0212565	0.0265592	0.251268	0.00187809	0.957717	0.149684	0.0143179	0.108915
(-)-Carvone	Terpenoids	C10H14O	6485-40-1	0.523163	0.413701	0.814517	0.569742	0.478692	0.624382	0.965667	0.832585	0.830085	0.762803	0.549889	0.712614	0.718592	1.43107	1.71416	1.13739	0.763445	0.802007	0.927076	0.982681	1.07271	0.832059	1.56424	1.55303	0.726557	0.375576	0.793076	0.289633	0.352253	0.349933	1.193	1.83627	1.60737	1.48794	0.879661	1.19665
(1.alpha.,2.beta.,5.alpha.)-2-methyl-5-(1-methylethenyl)-Cyclohexanol	Terpenoids	C10H18O	38049-26-2	0.0286564	0.0261314	0.0435152	0.0322726	0.036177	0.0329969	0.0477961	0.042292	0.0420845	0.0344178	0.025692	0.0370844	0.0294403	0.0686447	0.0804051	0.0480977	0.0306926	0.0391354	0.0422557	0.0461288	0.0441345	0.0348241	0.0714622	0.0739481	0.0311394	0.0182426	0.0341297	0.0148402	0.00730074	0.0170351	0.0525072	0.0678107	0.0671471	0.0676743	0.0402855	0.0541314
(1.alpha.,4a.beta.,8a.alpha.)-1,2,3,4,4a,5,6,8a-octahydro-7-methyl-4-methylene-1-(1-methylethyl)-Naphthalene	Terpenoids	C15H24	39029-41-9	0.142146	0.0702274	0.180041	0.118868	0.0705427	0.15403	0.095058	0.309197	0.243104	0.0623273	0.048659	0.171479	0.278535	0.821088	0.483998	0.635964	0.289092	0.142901	0.330621	0.268933	0.29226	0.113539	0.359681	0.498945	0.189272	0.210203	0.282953	0.171943	0.218309	0.263519	0.329585	0.381852	0.166019	0.255943	0.367995	0.314955
(1R,4R,4aS,8aR)-4,7-Dimethyl-1-(prop-1-en-2-yl)-1,2,3,4,4a,5,6,8a-octahydronaphthalene	Terpenoids	C15H24	92692-39-2	0.0013244	0.0280435	0.0134975	0.00151979	0.00151863	0.00459007	0.00620928	0.0120582	0.00842214	0.0134678	0.0113748	0.0108728	0.0169216	0.0583671	0.049624	0.0635899	0.0146893	0.0210013	0.0408422	0.0412431	0.0438163	0.0307435	0.0378683	0.0489458	0.0405146	0.0357627	0.000721384	0.000326095	0.000692496	0.000485477	0.510787	0.0038615	1.94589	0.283611	0.0250909	0.172455
(1R,5S)-1,8-Dimethyl-4-(propan-2-ylidene)spiro[4.5]dec-7-ene	Terpenoids	C15H24	28400-12-6	0.0120321	0.0112463	0.0148938	0.0107028	0.00634324	0.0130027	0.00920599	0.0464685	0.0314847	0.0103549	0.00525711	0.0205892	0.0277067	0.155682	0.0717492	0.0896657	0.0393182	0.0342281	0.0387691	0.0230293	0.0347967	0.00948998	0.0338433	0.0557296	0.0158515	0.016793	0.0292494	0.0144453	0.0228092	0.0282436	0.0387737	0.0346604	0.0430621	0.0352774	0.0477031	0.040209
(1S,2E,6E,10R)-3,7,11,11-Tetramethylbicyclo[8.1.0]undeca-2,6-diene	Terpenoids	C15H24	24703-35-3	0.321587	0.216843	0.297628	0.34724	0.199453	0.324947	0.68438	0.546524	0.497156	0.458398	0.473718	0.35628	0.334416	0.634561	0.965721	0.540876	0.487744	0.357145	0.623033	0.510993	0.741681	0.493246	0.812793	0.82487	0.281695	0.133212	0.367726	0.10621	0.152309	0.172195	0.602583	1.38063	0.832672	0.966929	0.545613	0.768486
(1S,4S,4aR)-1-Isopropyl-4-methyl-7-methylene-1,2,3,4,4a,5,6,7-octahydronaphthalene	Terpenoids	C15H24	157477-72-0	0.517175	0.399914	0.734054	0.495653	0.46329	0.667039	0.167264	0.139505	0.270494	0.0885514	0.560515	0.215628	1.17233	1.94009	2.29293	0.66688	1.39535	2.59957	0.428007	0.390665	0.453228	0.294806	0.573134	0.637013	0.304453	0.223548	0.375753	0.192792	0.214406	0.25651	0.4376	0.670503	0.523661	0.538539	0.420744	0.445541
(1S,4S,4aS)-1-Isopropyl-4,7-dimethyl-1,2,3,4,4a,5-hexahydronaphthalene	Terpenoids	C15H24	267665-20-3	0.517175	0.399914	0.734054	0.495653	0.46329	0.667039	0.167264	0.139505	0.270494	0.0885514	0.560515	0.215628	1.17233	1.94009	2.29293	0.66688	1.39535	2.59957	0.428007	0.390665	0.453228	0.294806	0.573134	0.637013	0.304453	0.223548	0.375753	0.192792	0.214406	0.25651	0.4376	0.670503	0.523661	0.538539	0.420744	0.445541
(1S,4aR,7R)-1,4a-Dimethyl-7-(prop-1-en-2-yl)-1,2,3,4,4a,5,6,7-octahydronaphthalene	Terpenoids	C15H24	52026-55-8	0.0245466	0.0195272	0.020008	0.0154394	0.00977482	0.0200894	0.00339184	0.0768115	0.0317068	0.0295512	0.0109821	0.0172894	0.00961245	0.225665	0.065754	0.113159	0.020429	0.049764	0.0446581	0.0426365	0.0715358	0.0833359	0.0689366	0.0406254	0.0294671	0.0285384	0.0398982	0.0239757	0.0312742	0.0314858	0.0316946	0.00177414	0.114448	0.0325765	0.0161518	0.0477597
(1S,5S,6R)-6-Methyl-2-methylene-6-(4-methylpent-3-en-1-yl)bicyclo[3.1.1]heptane	Terpenoids	C15H24	15438-94-5	0.152288	0.0939203	0.190025	0.172629	0.100371	0.15818	0.3225	0.284823	0.255265	0.2936	0.225802	0.218759	0.198176	0.376225	0.484798	0.338803	0.234658	0.208951	0.315789	0.314805	0.39068	0.300385	0.426551	0.436209	0.164623	0.128139	0.218885	0.119811	0.068916	0.0838106	0.303352	0.660427	0.51238	0.471781	0.25872	0.381685
(2R,3R,6S)-6-Isopropyl-3-methyl-2-(prop-1-en-2-yl)-3-vinylcyclohexanone	Terpenoids	C15H24O	39020-72-9	0.118605	0.0771675	0.734054	0.495653	0.0743889	0.120569	0.461886	0.408401	0.430565	0.351089	0.286655	0.337307	0.373024	0.771653	0.800711	0.646951	0.367483	0.346497	0.428007	0.390665	0.453228	0.294806	0.573134	0.637013	0.117641	0.0469438	0.173076	0.0380446	0.060479	0.0707837	0.4376	0.670503	0.523661	0.538539	0.420744	0.445541
(2S,3S,6S)-6-Isopropyl-3-methyl-2-(prop-1-en-2-yl)-3-vinylcyclohexanone	Terpenoids	C15H24O	21698-44-2	0.118605	0.0771675	0.734054	0.495653	0.0743889	0.120569	0.461886	0.408401	0.430565	0.351089	0.286655	0.337307	0.373024	0.771653	0.800711	0.646951	0.367483	0.346497	0.428007	0.390665	0.453228	0.294806	0.573134	0.637013	0.117641	0.0469438	0.173076	0.0380446	0.060479	0.0707837	0.4376	0.670503	0.523661	0.538539	0.420744	0.445541
(4R,4aS,6S)-4,4a-Dimethyl-6-(prop-1-en-2-yl)-1,2,3,4,4a,5,6,7-octahydronaphthalene	Terpenoids	C15H24	823810-22-6	0.332526	0.223523	0.376298	0.374064	0.215071	0.344276	0.742899	0.571603	0.507119	0.576779	0.529106	0.450405	0.441472	0.750332	0.973909	0.687465	0.535058	0.347789	0.653483	0.648414	0.810816	0.621287	0.883215	0.899436	0.299376	0.135659	0.389615	0.110302	0.158919	0.18953	0.71517	1.3824	0.852995	0.982406	0.535855	0.794351
(4aS-cis)-2,4a,5,6,7,8,9,9a-octahydro-3,5,5-trimethyl-9-methylene-1H-Benzocycloheptene	Terpenoids	C15H24	3853-83-6	0.517175	0.399914	0.734054	0.495653	0.46329	0.667039	0.0298971	0.102625	0.0474102	0.117173	0.286655	0.0832483	0.373024	0.771653	0.800711	0.646951	0.367483	0.346497	0.428007	0.390665	0.453228	0.294806	0.573134	0.637013	0.304453	0.223548	0.375753	0.192792	0.214406	0.25651	4.46304	0.0320242	20.6046	2.35041	0.234204	1.40498
(5R,10R)-10-Methyl-6-methylene-2-(propan-2-ylidene)spiro[4.5]dec-7-ene	Terpenoids	C15H22	28908-27-2	0.0390782	0.033576	0.0512228	0.0341898	0.0203655	0.0422386	0.0283104	0.0919905	0.0694757	0.0231748	0.0143005	0.0512096	0.0827008	0.342411	0.153332	0.218784	0.0999366	0.0404511	0.0979159	0.0712725	0.117332	0.0271666	0.137603	0.118446	0.0513409	0.055863	0.0791482	0.0585851	0.0592137	0.0694068	0.105863	0.116878	0.0796057	0.0745404	0.145384	0.078007
(E)-.beta.-Famesene	Terpenoids	C15H24	18794-84-8	0.00151521	0.000917504	0.0172924	0.00159762	0.00234665	0.00731424	0.00680359	0.0193001	0.0101696	0.022154	0.0837375	0.0165262	0.173649	0.372562	0.407444	0.2585	0.207282	0.521062	0.0408422	0.0412431	0.0438163	0.0307435	0.0378683	0.0489458	0.0405146	0.0357627	0.0449561	0.0180981	0.0211983	0.0267705	0.605271	0.00330602	2.60457	0.325607	0.0318825	0.191374
(S,1Z,6Z)-8-Isopropyl-1-methyl-5-methylenecyclodeca-1,6-diene	Terpenoids	C15H24	317819-80-0	0.517175	0.399914	0.734054	0.495653	0.46329	0.667039	0.0961301	0.081931	0.159564	0.0527479	0.326545	0.124535	0.556975	1.11942	1.09424	0.511324	0.678855	1.53583	0.428007	0.390665	0.453228	0.294806	0.573134	0.637013	0.304453	0.223548	0.375753	0.192792	0.214406	0.25651	0.4376	0.670503	0.523661	0.538539	0.420744	0.445541
.alpha.-Farnesene	Terpenoids	C15H24	502-61-4	0.125843	0.08975	0.159593	0.113288	0.0449679	0.138723	0.0961189	0.24552	0.20089	0.0676747	0.0327051	0.167056	0.225301	0.583709	0.370614	0.421235	0.211381	0.0820631	0.303713	0.243727	0.27844	0.087239	0.318901	0.432391	0.122274	0.12573	0.255668	0.177776	0.219183	0.239672	0.258971	0.356895	0.118614	0.209559	0.316646	0.19513
.alpha.-Ionone	Terpenoids	C13H20O	127-41-3	0.181269	0.0333552	0.056455	0.222987	0.0913358	0.12085	0.0432371	0.0285369	0.0163795	0.0405272	0.020633	0.0145314	0.00837045	0.0721082	0.029176	0.0167301	0.00972539	0.0114672	0.0222234	0.0215912	0.0247333	0.0199264	0.0279792	0.0288063	0.0152039	0.00335342	0.0156193	0.00364827	0.00704555	0.0104033	0.013403	0.0434001	0.0357854	0.0290225	0.015627	0.0224097
.alpha.-Muurolene	Terpenoids	C15H24	10208-80-7	0.0968363	0.0644753	0.120959	0.0821294	0.0446391	0.100598	0.0640321	0.356698	0.233428	0.0730207	0.0377959	0.158888	0.208096	1.19491	0.555036	0.720031	0.302719	0.216125	0.296294	0.1751	0.268855	0.0606347	0.195049	0.268684	0.117884	0.124301	0.248307	0.107506	0.132272	0.21487	0.289875	0.347293	0.320298	0.256773	0.354752	0.284822
.beta.-Bisabolene	Terpenoids	C15H24	495-61-4	0.0153686	0.0151237	0.0259604	0.0164208	0.0113285	0.0212516	0.0210499	0.0677506	0.0265549	0.0181641	0.0119949	0.0215491	0.034202	0.190233	0.0913054	0.11627	0.0462029	0.0357429	0.0443196	0.0320424	0.0404177	0.0123364	0.0445954	0.0386589	0.0232313	0.0231662	0.0326074	0.0149853	0.0236666	0.0301715	0.0494057	0.0568644	0.064642	0.061506	0.0476217	0.0565583
.beta.-Guaiene	Terpenoids	C15H24	88-84-6	0.117211	0.0748216	0.137125	0.119069	0.0582804	0.116011	0.249376	0.169308	0.196663	0.212223	0.14209	0.139196	0.137005	0.257713	0.321772	0.217162	0.159102	0.152323	0.259646	0.253829	0.335379	0.252187	0.345202	0.350035	0.133578	0.0429415	0.176675	0.0156498	0.0200681	0.0532686	0.243393	0.498158	0.228161	0.393211	0.212385	0.313327
1,3-Cyclohexadiene, 1-methyl-4-(1-methylethyl)-	Terpenoids	C10H16	99-86-5	0.517175	0.399914	0.734054	0.495653	0.46329	0.667039	0.0202697	0.584219	0.0191271	0.0157507	0.286655	0.00759117	0.373024	0.771653	0.800711	0.646951	0.367483	0.346497	0.428007	0.00583411	0.00633865	0.00628781	0.00741676	0.00949553	0.304453	0.223548	0.375753	0.192792	0.214406	0.25651	0.4376	0.0105161	0.523661	0.0910119	0.0136625	0.0160438
1,3-Cyclohexadiene, 5-(1,5-dimethyl-4-hexenyl)-2-methyl-, [S-(R*,S*)]-	Terpenoids	C15H24	495-60-3	0.337348	0.227984	0.382325	0.36686	0.214564	0.273381	0.780572	0.585639	0.518663	0.582039	0.585588	0.515219	0.478443	1.17073	1.39064	0.70806	0.58656	0.55496	0.687177	0.555712	0.819801	0.536613	0.907486	0.919073	0.305516	0.138338	0.396939	0.110464	0.158916	0.191017	0.743828	1.39205	1.21771	1.00673	0.553516	0.78934
1,3-Cyclohexadiene-1-carboxaldehyde, 2,6,6-trimethyl-	Terpenoids	C10H14O	116-26-7	0.979206	0.781698	1.41751	1.05231	0.901881	1.16694	1.84425	1.5274	1.53162	1.38798	0.999095	1.33212	1.3501	2.66293	2.96726	2.08818	1.42413	1.46988	1.70701	1.82859	1.95926	1.52979	2.88661	2.86498	1.34622	0.693597	1.44196	0.529044	0.653636	0.64752	2.19326	3.31071	3.10584	2.6892	1.65113	2.20402
1,5-Heptadien-4-one, 3,3,6-trimethyl-	Terpenoids	C10H16O	546-49-6	0.437224	0.353561	0.655605	0.435676	0.421527	0.51125	0.69166	0.528456	0.53731	0.449592	0.349305	0.504999	0.118212	0.961492	1.11291	0.323902	0.272604	0.180712	0.692142	0.754079	0.38032	0.323628	0.920515	0.904059	0.369109	0.497886	0.656115	0.391936	0.416065	0.307246	0.844229	0.934132	1.05253	0.906103	0.636499	0.795726
1,6,10-Dodecatriene, 7,11-dimethyl-3-methylene-	Terpenoids	C15H24	77129-48-7	0.00151521	0.000917504	0.0172924	0.00159762	0.00234665	0.00731424	0.00680359	0.0193001	0.0101696	0.022154	0.0837375	0.0165262	0.173649	0.372562	0.407444	0.2585	0.207282	0.521062	0.0408422	0.0412431	0.0438163	0.0307435	0.0378683	0.0489458	0.0405146	0.0357627	0.0449561	0.0180981	0.0211983	0.0267705	0.605271	0.00330602	2.60457	0.325607	0.0318825	0.191374
1,7-Octadiene, 2-methyl-6-methylene-	Terpenoids	C10H16	1686-30-2	0.0457833	0.0356512	0.0800423	0.0551955	0.0818581	0.0827764	0.461886	0.408401	0.430565	0.351089	0.286655	0.337307	0.373024	0.771653	0.800711	0.646951	0.367483	0.346497	0.428007	0.390665	0.453228	0.294806	0.573134	0.637013	0.304453	0.223548	0.375753	0.192792	0.214406	0.25651	0.4376	0.670503	0.523661	0.538539	0.420744	0.445541
1-Cyclohexene-1-carboxylic acid, 4-(1-methylethenyl)-	Terpenoids	C10H14O2	7694-45-3	0.0226907	0.0136474	0.0279823	0.0263284	0.0153051	0.0250965	0.0485865	0.0425321	0.0388637	0.0444147	0.0349684	0.0350463	0.0299766	0.0585187	0.0735608	0.0517814	0.0363119	0.033412	0.0499716	0.0493768	0.0622619	0.0462365	0.0645765	0.0686964	0.0267736	0.00947368	0.0357796	0.00768977	0.0101678	0.012988	0.0459665	0.10329	0.0846381	0.0891444	0.03982	0.0589747
1-methyl-4-(1,2,2-trimethylcyclopentyl)cyclohexa-1,3-diene	Terpenoids	C15H24	29621-78-1	0.0805529	0.0538827	0.101366	0.0687462	0.0376852	0.0833682	0.0828154	0.252377	0.199272	0.0543767	0.0605723	0.106715	0.175107	0.799158	0.442919	0.50231	0.237627	0.194418	0.205052	0.148686	0.232274	0.0665246	0.27462	0.363208	0.100998	0.110824	0.217215	0.0932476	0.120086	0.184866	0.232924	0.298958	0.198094	0.216567	0.29674	0.22787
1H-3a,7-Methanoazulene, octahydro-3,8,8-trimethyl-6-methylene-, [3R-(3.alpha.,3a.beta.,7.beta.,8a.alpha.)]-	Terpenoids	C15H24	546-28-1	0.00225215	0.000988261	0.0020222	0.00149463	0.00274457	0.00178057	0.0324438	0.0412664	0.0580031	0.0476559	0.0911363	0.00909056	0.0401685	0.130052	0.11442	0.0921021	0.0754033	0.156546	0.000755986	0.00106867	0.000813131	0.000720146	0.000924764	0.00157188	0.00105902	0.000369642	0.0015051	0.000494513	0.00392428	0.000601238	0.0173741	0.00528582	0.0598956	0.0330729	0.00162405	0.0320761
1H-Benzocycloheptene, 2,4a,5,6,7,8-hexahydro-3,5,5,9-tetramethyl-, (R)-	Terpenoids	C15H24	1461-03-6	0.337348	0.227984	0.382325	0.36686	0.214564	0.273381	0.780572	0.585639	0.518663	0.582039	0.585588	0.515219	0.478443	1.17073	1.39064	0.70806	0.58656	0.55496	0.687177	0.555712	0.819801	0.536613	0.907486	0.919073	0.305516	0.138338	0.396939	0.110464	0.158916	0.191017	0.743828	1.39205	1.21771	1.00673	0.553516	0.78934
2,4-Cycloheptadien-1-one, 2,6,6-trimethyl-	Terpenoids	C10H14O	503-93-5	0.979206	0.781698	1.41751	1.05231	0.901881	1.16694	1.84425	1.5274	1.53162	1.38798	0.999095	1.33212	1.3501	2.66293	2.96726	2.08818	1.42413	1.46988	1.70701	1.82859	1.95926	1.52979	2.88661	2.86498	1.34622	0.693597	1.44196	0.529044	0.653636	0.64752	2.19326	3.31071	3.10584	2.6892	1.65113	2.20402
2,6-Octadienal, 3,7-dimethyl-, (E)-	Terpenoids	C10H16O	141-27-5	0.0219877	0.0253571	0.0693737	0.0246654	0.0388853	0.0501287	0.0440967	0.0292324	0.0420701	0.0399913	0.0249217	0.0251261	0.0388797	0.0635488	0.0744407	0.0587366	0.0243066	0.0270572	0.0156493	0.0219653	0.0297813	0.0269157	0.0288493	0.0280256	0.0218739	0.0128502	0.0287536	0.0121122	0.0126169	0.0145597	0.0286958	0.0742207	0.0586015	0.0560912	0.02388	0.0460431
2,6-Octadienal, 3,7-dimethyl-, (Z)-	Terpenoids	C10H16O	106-26-3	0.0105159	0.00953992	0.0159457	0.00952256	0.00812069	0.0144186	0.0248443	0.0261558	0.0120528	0.0179689	0.0134408	0.0137952	0.0286609	0.052399	0.0651484	0.0441017	0.0317776	0.0287859	0.028422	0.0192462	0.0175252	0.0195909	0.0299906	0.0358164	0.0182181	0.0106979	0.0160056	0.00769782	0.00673295	0.013098	0.0245595	0.034688	0.0464112	0.041167	0.0162849	0.0344332
2-methyl-5-(1-methylethenyl)-Cyclohexanol	Terpenoids	C10H18O	619-01-2	0.0200394	0.04176	0.0406244	0.0497056	0.158839	0.017494	0.0256577	0.0214895	0.0209807	0.0146356	0.011879	0.0134531	0.0107343	0.0258058	0.028845	0.0124847	0.0130587	0.00820824	0.0272311	0.0301397	0.0270668	0.0219298	0.0419181	0.0541824	0.0303898	0.0173181	0.0388183	0.00806757	0.0155616	0.0160252	0.024526	0.029117	0.0372859	0.0348114	0.0184465	0.0289264
3,6-Octadien-1-ol, 3,7-dimethyl-, (Z)-	Terpenoids	C10H18O	5944-20-7	0.828057	0.67056	1.17407	0.910345	0.786577	1.03297	1.56239	1.28707	1.2911	1.16061	0.852563	1.11679	1.1416	2.19256	2.66124	1.74651	1.19438	1.26329	1.45034	1.50499	1.62122	1.28193	2.17236	2.35278	1.09009	0.562269	1.19858	0.443123	0.548099	0.536537	1.77481	2.51586	2.39325	2.07815	1.4161	1.8652
5,9-Undecadien-2-one, 6,10-dimethyl-	Terpenoids	C13H22O	689-67-8	0.0213353	0.0162035	0.0422057	0.0209041	0.0195902	0.0303998	0.0325888	0.0272469	0.0257833	0.034572	0.0134727	0.016035	0.0130419	0.0324551	0.0308832	0.0360199	0.0106621	0.0164525	0.0160448	0.020346	0.023205	0.0226401	0.0260816	0.0221217	0.0180065	0.0127606	0.0184714	0.00905209	0.00959386	0.0106818	0.163661	0.013883	0.610124	0.129573	0.0242301	0.0924139
6-Octen-1-ol, 7-methyl-3-methylene-	Terpenoids	C10H18O	13066-51-8	1.05349	0.867359	1.67592	1.16099	1.04294	1.32097	1.82805	1.60938	1.60199	1.41797	1.06694	1.37771	1.25504	2.56241	2.90368	1.90487	1.33978	1.48079	1.54674	1.70347	1.7849	1.45589	2.7603	2.55483	1.39984	0.706473	1.40197	0.57399	0.686535	0.651976	2.10413	2.74599	2.68763	2.50273	1.49249	2.02306
7-Octen-4-ol, 2-methyl-6-methylene-, (S)-	Terpenoids	C10H18O	35628-05-8	0.175399	0.150435	0.327793	0.174773	0.167944	0.245718	0.532924	0.412703	0.486895	0.36461	0.318032	0.390444	0.741276	1.49365	1.46331	1.43502	0.712186	1.06965	0.239859	0.228013	0.263158	0.21959	0.391655	0.440224	0.210713	0.125994	0.225808	0.12872	0.150392	0.110406	0.372121	0.50226	0.322912	0.449491	0.265518	0.353054
Benzene, 1-(1,5-dimethylhexyl)-4-methyl-	Terpenoids	C15H24	1461-02-5	0.517175	0.399914	0.734054	0.495653	0.46329	0.667039	0.0429215	0.0303718	0.0670435	0.0238707	0.148405	0.0567093	0.242665	0.454686	0.458454	0.203646	0.281347	0.635249	0.428007	0.390665	0.453228	0.294806	0.573134	0.637013	0.304453	0.223548	0.375753	0.192792	0.214406	0.25651	0.4376	0.670503	0.523661	0.538539	0.420744	0.445541
Benzene, 1-methyl-4-(1,2,2-trimethylcyclopentyl)-, (R)-	Terpenoids	C15H22	16982-00-6	0.0300327	0.0197021	0.0368167	0.0242577	0.0149907	0.0310324	0.019711	0.0486208	0.0471066	0.0153842	0.0125639	0.0332637	0.0336863	0.115773	0.0867882	0.0836278	0.0422356	0.0184248	0.0587673	0.0420711	0.0681865	0.0183041	0.080197	0.10515	0.0296439	0.0420848	0.058118	0.0274877	0.0353347	0.0537953	0.0496689	0.0864811	0.022004	0.0551323	0.0821814	0.0454684
Bicyclo[3.1.1]heptan-3-ol, 2,6,6-trimethyl-, (1.alpha.,2.beta.,3.alpha.,5.alpha.)-	Terpenoids	C10H18O	27779-29-9	0.0877832	0.0842166	0.26469	0.159738	0.112541	0.120215	0.201072	0.176677	0.155019	0.0814926	0.067046	0.10515	0.0940783	0.256071	0.707725	0.217778	0.0590889	0.0756275	0.30247	0.313605	0.299081	0.244857	0.50414	0.447255	0.145741	0.064604	0.135649	0.0377127	0.0562992	0.0594081	0.215593	0.649253	0.751234	0.628739	0.183506	0.473232
Bicyclo[3.1.1]heptane, 6-methyl-2-methylene-6-(4-methyl-3-pentenyl)-, [1R-(1.alpha.,5.alpha.,6.beta.)]-	Terpenoids	C15H24	55123-21-2	0.517175	0.399914	0.734054	0.495653	0.46329	0.667039	0.144514	0.124912	0.238365	0.0799313	0.513252	0.194832	0.844084	1.60604	1.61388	0.726375	0.986478	2.20961	0.428007	0.390665	0.453228	0.294806	0.573134	0.637013	0.304453	0.223548	0.375753	0.192792	0.214406	0.25651	0.4376	0.670503	0.523661	0.538539	0.420744	0.445541
Bicyclo[3.2.1]oct-2-ene, 3-methyl-4-methylene-	Terpenoids	C10H14	49826-53-1	0.025128	0.0268992	0.0547134	0.02815	0.0270762	0.0339773	0.0476041	0.0638672	0.0460196	0.0806604	0.100043	0.0924916	0.508028	0.338189	0.295084	0.111727	0.263841	0.415539	0.00512528	0.00591405	0.00586324	0.0212661	0.00446718	0.00613794	0.0149319	0.00500769	0.0312848	0.00385008	0.00356906	0.00559124	0.0118926	0.0162485	0.0129141	0.0234287	0.0200349	0.0214652
Bicyclo[4.4.0]dec-1-ene, 2-isopropyl-5-methyl-9-methylene-	Terpenoids	C15H24	150320-52-8	0.142146	0.0702274	0.180041	0.118868	0.0705427	0.15403	0.095058	0.309197	0.243104	0.0623273	0.048659	0.171479	0.278535	0.821088	0.483998	0.635964	0.289092	0.142901	0.330621	0.268933	0.29226	0.113539	0.359681	0.498945	0.189272	0.210203	0.282953	0.171943	0.218309	0.263519	0.329585	0.381852	0.166019	0.255943	0.367995	0.314955
Bicyclo[7.2.0]undecane, 10,10-dimethyl-2,6-bis(methylene)-, [1S-(1R*,9S*)]-	Terpenoids	C15H24	136296-38-3	0.0822448	0.0564244	0.095355	0.0887289	0.0516392	0.0843932	0.21286	0.145892	0.150159	0.16018	0.148127	0.127723	0.119622	0.293267	0.347858	0.199528	0.148339	0.138345	0.17996	0.171782	0.220586	0.170125	0.221691	0.226247	0.0930794	0.0410612	0.0998393	0.022953	0.0443698	0.0496509	0.18374	0.339375	0.29917	0.296112	0.150493	0.193586
Bicyclosesquiphellandrene	Terpenoids	C15H24	54324-03-7	0.117211	0.0748216	0.137125	0.119069	0.0582804	0.116011	0.249376	0.169308	0.196663	0.212223	0.14209	0.139196	0.137005	0.257713	0.321772	0.217162	0.159102	0.152323	0.259646	0.253829	0.335379	0.252187	0.345202	0.350035	0.133578	0.0429415	0.176675	0.0156498	0.0200681	0.0532686	0.243393	0.498158	0.228161	0.393211	0.212385	0.313327
Camphor	Terpenoids	C10H16O	76-22-2	0.00856319	0.00916867	0.0112068	0.0146391	0.0127421	0.0170336	0.00772127	0.0211612	0.00790673	0.0181483	0.00740894	0.00452309	0.00721627	0.0344774	0.0595071	0.0635957	0.0129444	0.0378298	0.0552503	0.0640675	0.0657506	0.0513429	0.0798957	0.0980293	0.0210989	0.00786334	0.0135857	0.00781158	0.00592514	0.00885017	0.0220735	0.0445489	0.0326631	0.0286752	0.0184184	0.0230795
Carvone	Terpenoids	C10H14O	99-49-0	0.189082	0.149512	0.293677	0.206922	0.175328	0.231868	0.348527	0.296079	0.300695	0.282186	0.196868	0.259865	0.258877	0.505374	0.623287	0.412071	0.272239	0.294563	0.329659	0.349668	0.396695	0.307434	0.564952	0.557225	0.260876	0.135547	0.287698	0.10685	0.133043	0.126547	0.439028	0.674792	0.625315	0.534958	0.310303	0.428874
Caryophyllene	Terpenoids	C15H24	87-44-5	0.517175	0.399914	0.734054	0.495653	0.46329	0.667039	0.461886	0.140225	0.0388026	0.0363576	0.286655	0.0178919	0.0176111	0.425259	0.121248	0.213012	0.0378377	0.092938	0.428007	0.390665	0.453228	0.294806	0.573134	0.637013	0.304453	0.223548	0.375753	0.192792	0.214406	0.25651	0.0594421	0.00269981	0.221919	0.0611149	0.0304264	0.0888376
Citral	Terpenoids	C10H16O	5392-40-5	0.0372538	0.0450977	0.127798	0.0411763	0.0722222	0.0707105	0.0614867	0.0498914	0.0581574	0.0565853	0.0430216	0.0427368	0.0725642	0.0888504	0.103075	0.105823	0.0451026	0.0490124	0.0372242	0.0616257	0.0402466	0.0378178	0.0408564	0.0388507	0.0411055	0.0301031	0.0489622	0.028366	0.0290896	0.0346838	0.0499992	0.134229	0.104303	0.101664	0.0432631	0.0860509
Cyclohexanol, 1-methyl-4-(1-methylethylidene)-	Terpenoids	C10H18O	586-81-2	0.0200394	0.04176	0.0406244	0.0497056	0.158839	0.017494	0.0256577	0.0214895	0.0209807	0.0146356	0.011879	0.0134531	0.0107343	0.0258058	0.028845	0.0124847	0.0130587	0.00820824	0.0272311	0.0301397	0.0270668	0.0219298	0.0419181	0.0541824	0.0303898	0.0173181	0.0388183	0.00806757	0.0155616	0.0160252	0.024526	0.029117	0.0372859	0.0348114	0.0184465	0.0289264
Cyclohexanone, 5-methyl-2-(1-methylethyl)-, cis-	Terpenoids	C10H18O	491-07-6	0.00995781	0.0129626	0.0215468	0.00932103	0.0118066	0.0199621	0.0179893	0.0507398	0.025269	0.0111542	0.00877181	0.00941628	0.0200034	0.0860035	0.0522002	0.0491125	0.0097665	0.0106912	0.0459945	0.0620056	0.0466579	0.0362415	0.0526098	0.0587239	0.0279235	0.0606644	0.0718274	0.0098929	0.0265096	0.0580042	0.135204	0.0403494	0.563743	0.0852236	0.0382105	0.0619813
Cyclohexanone, 5-methyl-2-(1-methylethyl)-, trans-	Terpenoids	C10H18O	89-80-5	0.00995781	0.0129626	0.0215468	0.00932103	0.0118066	0.0199621	0.0179893	0.0507398	0.025269	0.0111542	0.00877181	0.00941628	0.0200034	0.0860035	0.0522002	0.0491125	0.0097665	0.0106912	0.0459945	0.0620056	0.0466579	0.0362415	0.0526098	0.0587239	0.0279235	0.0606644	0.0718274	0.0098929	0.0265096	0.0580042	0.135204	0.0403494	0.563743	0.0852236	0.0382105	0.0619813
Cyclohexene, 4-[(1E)-1,5-dimethyl-1,4-hexadien-1-yl]-1-methyl-	Terpenoids	C15H24	25532-79-0	0.0225088	0.0139899	0.0319523	0.0203219	0.0129994	0.0218374	0.0234322	0.275828	0.0790048	0.0582877	0.0166855	0.0420508	0.0751962	1.09924	0.272879	0.554006	0.177818	0.187963	0.0594024	0.0364419	0.0542765	0.0154118	0.0403445	0.0535272	0.0312553	0.03272	0.0466533	0.0198934	0.025442	0.0452911	0.159558	0.0432725	0.410358	0.103119	0.158621	0.140845
D-Verbenone	Terpenoids	C10H14O	18309-32-5	0.979206	0.781698	1.41751	1.05231	0.901881	1.16694	1.84425	1.5274	1.53162	1.38798	0.999095	1.33212	1.3501	2.66293	2.96726	2.08818	1.42413	1.46988	1.70701	1.82859	1.95926	1.52979	2.88661	2.86498	1.34622	0.693597	1.44196	0.529044	0.653636	0.64752	2.19326	3.31071	3.10584	2.6892	1.65113	2.20402
Epizonarene	Terpenoids	C15H24	41702-63-0	0.00473038	0.00982214	0.0107941	0.00693233	0.00751456	0.0109075	0.00716184	0.140704	0.0360366	0.0348126	0.00434087	0.0199473	0.0345129	0.527681	0.140458	0.277705	0.0879492	0.124056	0.0205468	0.013568	0.0198613	0.0111269	0.02152	0.0190686	0.014203	0.0158642	0.0184362	0.0204144	0.0222833	0.0168543	0.0615677	0.0154701	0.204891	0.0462036	0.0623874	0.0726074
Furan, 3-(4-methyl-3-pentenyl)-	Terpenoids	C10H14O	539-52-6	1.28814	1.01554	2.46863	1.30263	1.44323	1.8912	2.38283	1.78802	2.01204	1.49095	1.086	1.52357	1.71081	3.83568	4.47605	3.25338	1.67857	2.05798	1.29262	1.25085	1.39236	1.17103	2.09453	2.34762	1.44804	0.751529	1.53547	0.585546	0.700152	0.67284	1.98626	2.69968	2.47268	2.41136	1.43938	1.89787
Geraniol	Terpenoids	C10H18O	106-24-1	0.0234402	0.0235408	0.0569847	0.0238882	0.0329016	0.0408972	0.0348153	0.028466	0.030535	0.0299703	0.0213665	0.0221059	0.02909	0.0481202	0.050871	0.0446268	0.0232658	0.024813	0.0159044	0.0202425	0.0213163	0.0209854	0.0210629	0.023965	0.0205228	0.0116947	0.0242672	0.0108197	0.0111004	0.0135739	0.0244427	0.0517196	0.0403191	0.0409427	0.0188882	0.0337023
Geranyl acetate	Terpenoids	C12H20O2	105-87-3	0.0130265	0.0180783	0.0243764	0.0153124	0.01396	0.0183767	0.0211758	0.0266526	0.0177156	0.0223075	0.0148201	0.0164383	0.0159422	0.0389175	0.0287359	0.032721	0.0122084	0.0219913	0.009729	0.0111747	0.015156	0.0116813	0.0128955	0.015782	0.0121638	0.00964015	0.014679	0.00910867	0.0111834	0.0127967	0.0218125	0.0427081	0.0961067	0.0397465	0.0206888	0.035695
Ionone	Terpenoids	C13H20O	8013-90-9	0.181269	0.0333552	0.056455	0.222987	0.0913358	0.12085	0.0432371	0.0285369	0.0163795	0.0405272	0.020633	0.0145314	0.00837045	0.0721082	0.029176	0.0167301	0.00972539	0.0114672	0.0222234	0.0215912	0.0247333	0.0199264	0.0279792	0.0288063	0.0152039	0.00335342	0.0156193	0.00364827	0.00704555	0.0104033	0.013403	0.0434001	0.0357854	0.0290225	0.015627	0.0224097
Iridomyrmecin	Terpenoids	C10H16O2	485-43-8	0.0456369	0.00405515	0.0185318	0.0449302	0.00524895	0.0100689	0.00592093	0.01284	0.00728091	0.0101114	0.00535603	0.0111263	0.00566958	0.0382357	0.0193046	0.0519149	0.00833427	0.0196094	0.0368894	0.0376642	0.0410495	0.0296067	0.0358958	0.0442244	0.0376333	0.0323727	0.0423612	0.016944	0.0201439	0.0252847	0.329055	0.00758055	1.53201	0.178615	0.0184899	0.107747
Isopinocarveol	Terpenoids	C10H16O	6712-79-4	0.0377381	0.0316443	0.0862537	0.0482031	0.0445527	0.0513718	0.0671216	0.0492922	0.0495868	0.0394163	0.0227817	0.0381531	0.0398973	0.097982	0.156381	0.0716851	0.0279198	0.0365062	0.0823738	0.0795867	0.0877418	0.0731812	0.0863959	0.105297	0.0554058	0.0245629	0.0491581	0.0179419	0.021992	0.0301687	0.079566	0.142303	0.113861	0.103104	0.0671538	0.0924004
Kessane	Terpenoids	C15H26O	3321-66-2	0.517175	0.399914	0.734054	0.495653	0.46329	0.667039	0.461886	0.765846	0.0768461	0.0683039	0.286655	0.050014	0.373024	0.0732466	0.0430535	0.115776	0.367483	0.292185	0.428007	0.390665	0.453228	0.294806	0.573134	0.637013	0.304453	0.223548	0.375753	0.192792	0.214406	0.25651	0.4376	0.670503	0.523661	0.538539	0.420744	0.445541
Limonene	Terpenoids	C10H16	138-86-3	0.0249691	0.0384406	0.045574	0.0346506	0.0469762	0.0310763	0.030767	1.94025	0.0441812	0.0293871	0.0206488	0.0180081	0.0190367	0.082339	0.0664174	0.211762	0.0278894	0.0605953	0.0185173	0.0207917	0.0133335	0.0194054	0.0208188	0.02051	0.0564181	0.0298288	0.0588345	0.0291202	0.0335997	0.0400236	0.031282	0.0225116	0.0244104	0.320658	0.0309584	0.0359816
Naphthalene, 1,2,3,4-tetrahydro-1,6-dimethyl-4-(1-methylethyl)-, (1S-cis)-	Terpenoids	C15H22	483-77-2	0.0216667	0.010542	0.0262699	0.0182161	0.00993293	0.0220059	0.0143371	0.0426845	0.0333485	0.0119188	0.00576041	0.0287891	0.0395042	0.10232	0.0790597	0.0749476	0.0391926	0.0187929	0.0474398	0.0393659	0.0416054	0.0170646	0.0523178	0.070703	0.0278648	0.0302485	0.0408961	0.0259365	0.0311753	0.0389797	0.0429846	0.0548674	0.0380161	0.0476307	0.0641431	0.042516
Naphthalene, decahydro-4a-methyl-1-methylene-7-(1-methylethenyl)-, [4aR-(4a.alpha.,7.alpha.,8a.beta.)]-	Terpenoids	C15H24	17066-67-0	0.114567	0.0674253	0.14038	0.130435	0.0759846	0.119559	0.245636	0.215649	0.190883	0.222434	0.16984	0.164499	0.145327	0.288098	0.36469	0.256357	0.178867	0.159372	0.243262	0.240476	0.304609	0.227334	0.323475	0.334645	0.125624	0.043561	0.165795	0.038219	0.0511064	0.0598961	0.231405	0.504964	0.39633	0.426938	0.194654	0.289186
Thujone	Terpenoids	C10H16O	546-80-5	0.139872	0.128562	0.231467	0.145724	0.165165	0.189512	0.231635	0.197914	0.19296	0.155588	0.132606	0.168094	0.153199	0.370776	0.417816	0.333839	0.197708	0.208139	0.183087	0.153079	0.205548	0.149797	0.227292	0.252447	0.138751	0.0797973	0.156099	0.0660119	0.0826789	0.0802649	0.235884	0.303324	0.282322	0.306527	0.157524	0.252206
Valerena-4,7(11)-diene	Terpenoids	C15H24	351222-66-7	0.0025352	0.399914	0.0185055	0.00214801	0.00245326	0.00518447	0.00617319	0.0149686	0.00879081	0.0147358	0.286655	0.0130764	0.373024	0.771653	0.800711	0.646951	0.367483	0.346497	0.428007	0.390665	0.453228	0.294806	0.573134	0.637013	0.304453	0.223548	0.375753	0.192792	0.214406	0.25651	0.624853	0.00423212	2.38959	0.290091	0.0289534	0.174665
[1S-(1.alpha.,7.alpha.,8a.beta.)]-1,2,3,5,6,7,8,8a-octahydro-1,4-dimethyl-7-(1-methylethenyl)-Azulene	Terpenoids	C15H24	3691-11-0	0.189868	0.128814	0.245212	0.163817	0.0872609	0.20083	0.122388	0.703775	0.44462	0.168954	0.251246	0.306112	0.403801	2.04046	1.01022	1.35151	0.53677	0.340416	0.601492	0.355443	0.546514	0.268338	0.653261	0.53728	0.243088	0.255042	0.506288	0.217119	0.274467	0.433667	0.537266	0.7019	0.503691	0.494007	0.689163	0.529518
cis-.alpha.-Bergamotene	Terpenoids	C15H24	18252-46-5	0.0458006	0.0438395	0.0910097	0.0465979	0.058073	0.0685212	0.200382	0.204391	0.236744	0.395375	0.302949	0.253084	0.0524943	0.160904	0.0940391	0.150296	0.0776766	0.0992206	0.0276134	0.0123263	0.0107873	0.0111198	0.0152209	0.0391595	0.00657656	0.00526219	0.00980281	0.00507916	0.00558915	0.00616361	0.0312306	0.0221639	0.0155431	0.0208005	0.00822462	0.0200581
cis-Dihydrocarvone	Terpenoids	C10H16O	3792-53-8	0.13273	0.111933	0.217343	0.144028	0.138021	0.1694	0.235044	0.219581	0.21547	0.190708	0.140757	0.180439	0.170192	0.334742	0.386574	0.258419	0.183312	0.201609	0.198641	0.220685	0.229931	0.186138	0.359198	0.337879	0.175176	0.0940062	0.178416	0.0792824	0.0892991	0.0855964	0.276923	0.358458	0.345982	0.324244	0.196515	0.262641
trans-.alpha.-Bergamotene	Terpenoids	C15H24	13474-59-4	0.517175	0.399914	0.734054	0.495653	0.46329	0.667039	0.461886	0.0823867	0.0223354	0.0222347	0.286655	0.0188593	0.373024	0.251932	0.0747085	0.159153	0.0223778	0.05598	0.428007	0.390665	0.453228	0.294806	0.573134	0.637013	0.304453	0.223548	0.375753	0.192792	0.214406	0.25651	0.045811	0.00191895	0.160852	0.0376496	0.0242885	0.0661767
trans-Geranic acid methyl ester	Terpenoids	C11H18O2	1189-09-9	0.0183353	0.0268649	0.0364061	0.0203722	0.0284843	0.0260118	0.0283268	0.0328127	0.0293249	0.0328853	0.0243971	0.0271869	0.0300711	0.052692	0.0590633	0.0483264	0.0257932	0.0265127	0.0166462	0.0235516	0.0268596	0.0224604	0.0249386	0.02533	0.0233903	0.0109212	0.0280126	0.01099	0.0106807	0.0150636	0.0289501	0.0640094	0.0482642	0.0498852	0.0183291	0.0406479
β-Funebrene	Terpenoids	C15H24	79120-98-2	0.0104088	0.0112239	0.0222851	0.0121279	0.011874	0.0165627	0.034668	0.0557908	0.0883482	0.112268	0.113251	0.0892184	0.0360081	0.146869	0.0615119	0.0850106	0.0520589	0.0726735	0.0113145	0.0129256	0.01648	0.0120754	0.0134562	0.0139707	0.0130571	0.00591481	0.0146432	0.00556838	0.00659042	0.0133762	0.0201599	0.038089	0.0270647	0.0304664	0.0114151	0.0341995
1,5-Cyclooctadiene, 1,6-dimethyl-	Hydrocarbons	C10H16	3760-13-2	0.00292569	0.00261386	0.00526106	0.00390185	0.00436153	0.00421149	0.0165485	0.0156931	0.017917	0.0156704	0.0118555	0.0150523	0.0171167	0.0358246	0.0343085	0.0343202	0.0181483	0.0196765	0.0123764	0.012518	0.0169344	0.0143667	0.0120184	0.0241059	0.0541499	0.00511738	0.0205022	0.00555581	0.00588125	0.00567204	0.00674386	0.00849309	0.00793187	0.00628831	0.0053516	0.00946874
1,5-Cycloundecadiene, 8,8-dimethyl-9-methylene-	Hydrocarbons	C14H22	62338-54-9	0.483359	0.281471	0.546252	0.542421	0.305153	0.497609	0.971659	0.851561	0.755365	0.84345	0.677557	0.659708	0.495395	1.18228	1.50101	1.00918	0.708355	0.53265	0.952033	0.921125	1.17881	0.873877	1.28604	1.30767	0.416065	0.205736	0.653058	0.157905	0.222736	0.270042	0.924833	2.01609	1.32552	1.48822	0.772524	1.19655
1,5-Heptadiene, 2,6-dimethyl-	Hydrocarbons	C9H16	6709-39-3	1.26857	0.829055	1.65662	1.0154	1.02556	1.51421	0.556758	0.169895	0.332997	0.364996	0.309414	0.229929	0.0271779	0.182646	0.162648	0.155164	0.0711695	0.109024	0.0704582	0.0868941	0.0683464	0.0647812	0.0823637	0.0959762	0.128394	0.0710944	0.108806	0.0570454	0.102651	0.0581344	0.0760998	0.0920611	0.108231	0.0901023	0.0603908	0.077805
2,6,10-Trimethyltridecane	Hydrocarbons	C16H34	3891-99-4	0.0363004	0.0363948	0.0708288	0.0408437	0.0381831	0.0556062	0.0659241	0.0589201	0.0668975	0.0536668	0.0437599	0.0426495	0.0517534	0.0938098	0.108758	0.0875926	0.0500278	0.065138	0.0352633	0.0418904	0.0507665	0.0450271	0.055609	0.0463175	0.0375122	0.018633	0.0361787	0.0178798	0.0167972	0.0219287	0.0752963	0.141832	0.0999777	0.125066	0.0403931	0.0923382
2,6-Octadiene, 2,6-dimethyl-	Hydrocarbons	C10H18	2792-39-4	0.148782	0.102903	0.261323	0.174579	0.273662	0.261415	0.461886	0.408401	0.430565	0.351089	0.286655	0.337307	0.373024	0.771653	0.800711	0.646951	0.367483	0.346497	0.428007	0.390665	0.453228	0.294806	0.573134	0.637013	0.0141137	0.223548	0.0407535	0.0144493	0.0166525	0.0114785	0.4376	0.670503	0.523661	0.538539	0.420744	0.445541
2-Tetradecene, (E)-	Hydrocarbons	C14H28	35953-54-9	0.0196363	0.0232813	0.0383677	0.0223482	0.0218317	0.0294608	0.0269373	0.0389811	0.0313208	0.0298685	0.0210642	0.0226439	0.0267594	0.0427714	0.0533807	0.0449715	0.0221035	0.0308027	0.0136195	0.0161394	0.0224687	0.0158907	0.0185939	0.0197284	0.0178343	0.0144336	0.0203657	0.0141598	0.0153738	0.0202154	0.0320958	0.0692917	0.148547	0.0578403	0.0286461	0.0500256
3,5-Dimethyldodecane	Hydrocarbons	C14H30	107770-99-0	0.0637524	0.0740481	0.153078	0.0688041	0.0836157	0.107967	0.097401	0.0847583	0.0909811	0.0816046	0.067107	0.0697758	0.0840138	0.140214	0.158662	0.120372	0.0698885	0.0790353	0.0447113	0.0594676	0.0603753	0.0586002	0.0616319	0.0588846	0.0602043	0.0364367	0.0763245	0.033415	0.0363259	0.0429734	0.0810195	0.162248	0.116111	0.126737	0.0527295	0.101646
7-Octylidenebicyclo[4.1.0]heptane	Hydrocarbons	C15H26	82253-11-0	0.107719	0.0921253	0.134021	0.0906438	0.0540779	0.113408	0.0739872	0.350271	0.247302	0.0831107	0.0458246	0.168254	0.224576	0.932941	0.541828	0.658965	0.270236	0.184906	0.265652	0.195284	0.311786	0.0729874	0.293025	0.401301	0.137619	0.152023	0.210589	0.130295	0.166068	0.251142	0.283338	0.310083	0.303145	0.276344	0.387883	0.281635
Decane	Hydrocarbons	C10H22	124-18-5	0.0909379	0.12646	0.204566	0.102573	0.157181	0.127005	0.0388767	0.0579504	0.0820686	0.0818997	0.0530927	0.0616684	0.110256	0.111307	0.0649624	0.0764444	0.0958782	0.0602918	0.0641929	0.0696896	0.0655503	0.0710847	0.0724601	0.0849385	0.0701554	0.0633046	0.135463	0.0665047	0.0699604	0.0758874	0.0919494	0.124817	0.0685882	0.0951065	0.0922113	0.106428
Decane, 2,3,5-trimethyl-	Hydrocarbons	C13H28	62238-11-3	0.0664035	0.0669491	0.147685	0.0727588	0.0796097	0.10826	0.129305	0.114121	0.115743	0.112222	0.0787681	0.0838426	0.098856	0.170818	0.202221	0.135966	0.0866668	0.0917775	0.0550472	0.0710106	0.0834173	0.0679869	0.085239	0.0803409	0.0729991	0.0305272	0.0794582	0.032538	0.0347888	0.0432851	0.105586	0.223102	0.150741	0.196679	0.0590317	0.150579
Decane, 3-ethyl-3-methyl-	Hydrocarbons	C13H28	17312-66-2	0.0648912	0.0671405	0.162543	0.071036	0.0933566	0.120089	0.0991453	0.0835672	0.089102	0.0844082	0.0677232	0.0675137	0.0856988	0.137851	0.154282	0.125605	0.0636538	0.0709729	0.0391449	0.0540102	0.0555478	0.0560004	0.0600522	0.0625145	0.0607349	0.032172	0.0712402	0.0276783	0.0285868	0.035665	0.0728422	0.143639	0.118509	0.109316	0.0565637	0.0954749
Decane, 5-ethyl-5-methyl-	Hydrocarbons	C13H28	17312-74-2	0.158834	0.179455	0.411463	0.175414	0.254026	0.303296	0.246936	0.200306	0.217386	0.200856	0.159832	0.164819	0.220204	0.345462	0.377735	0.324343	0.171951	0.187287	0.106215	0.130629	0.13814	0.138797	0.149826	0.160177	0.153072	0.0901049	0.198911	0.0815117	0.0912072	0.107752	0.179583	0.340681	0.291217	0.276082	0.151439	0.238643
Dodecane, 3-methyl-	Hydrocarbons	C13H28	17312-57-1	0.0362234	0.0355217	0.0948234	0.0391175	0.0544106	0.0683661	0.0592276	0.0502184	0.0550272	0.0490828	0.0405049	0.041326	0.0503291	0.087206	0.0994392	0.0754507	0.0413542	0.0473857	0.0274805	0.0356433	0.035887	0.0337855	0.0380118	0.0370616	0.0369963	0.0249636	0.0490328	0.023219	0.0159751	0.0256801	0.0479499	0.0974298	0.0742921	0.0741015	0.0317542	0.0611794
Dodecane, 4,6-dimethyl-	Hydrocarbons	C14H30	61141-72-8	0.103548	0.118891	0.272154	0.118657	0.161235	0.19841	0.180551	0.153045	0.168887	0.148774	0.110781	0.151375	0.177254	0.302297	0.277514	0.278061	0.144032	0.158408	0.0930738	0.124441	0.141275	0.122976	0.140804	0.132158	0.118236	0.0681155	0.144626	0.0628697	0.0660305	0.0859048	0.139824	0.303825	0.281853	0.295759	0.106492	0.241754
E-1-Methoxy-4-hexene	Hydrocarbons	C7H14O	134777-60-9	1.48508	0.858847	1.58359	1.88731	1.26507	1.99485	0.685707	0.243362	0.32887	0.522787	0.478119	0.369333	0.0271779	0.182646	0.162648	0.155164	0.0711695	0.109024	0.0704582	0.0868941	0.0683464	0.0647812	0.0823637	0.0959762	0.16245	0.105428	0.24333	0.118014	0.0950922	0.0644465	0.0760998	0.0920611	0.108231	0.0901023	0.0603908	0.077805
Heptadecane	Hydrocarbons	C17H36	629-78-7	0.0192842	0.011119	0.0254025	0.0299475	0.00898655	0.0197129	0.0664556	0.0573585	0.035683	0.0363086	0.0926945	0.0284386	0.0232807	0.0489704	0.0696578	0.0592869	0.0382511	0.0323785	0.0496838	0.0573108	0.0699519	0.0612137	0.0900577	0.0558977	0.0449939	0.0301519	0.0563042	0.0530769	0.0357147	0.0456068	0.113467	0.194234	0.188427	0.181043	0.0568522	0.114462
Heptadecane, 7-methyl-	Hydrocarbons	C18H38	20959-33-5	0.00740341	0.0076654	0.00906203	0.0105709	0.0042371	0.00748771	0.0224538	0.0189957	0.0139095	0.0186075	0.0129303	0.00964572	0.00787242	0.0154594	0.0245791	0.0219639	0.0106421	0.0106595	0.0191961	0.0159555	0.026014	0.0179554	0.0290479	0.0217302	0.0145991	0.009844	0.01791	0.0140051	0.0114878	0.0151102	0.0451197	0.0646269	0.0759386	0.0601322	0.022847	0.0370938
Hexadecane	Hydrocarbons	C16H34	544-76-3	0.0176384	0.0245243	0.0214538	0.0197725	0.018754	0.0171577	0.0268764	0.028288	0.0211316	0.0346778	0.040904	0.0116629	0.0108716	0.0219161	0.0308336	0.0247615	0.0130323	0.0112263	0.0220682	0.0142342	0.0376956	0.0165566	0.0310562	0.0258229	0.0270251	0.00879391	0.0321768	0.00596098	0.0156147	0.0188978	0.0531738	0.139633	0.160994	0.0993242	0.0617582	0.100178
Hexadecane, 2-methyl-	Hydrocarbons	C17H36	1560-92-5	0.00487311	0.00316955	0.0077997	0.00621336	0.0029773	0.00618418	0.014987	0.0102212	0.00757204	0.00946608	0.00830267	0.00530366	0.00423481	0.00985813	0.015039	0.0118215	0.00661732	0.00700509	0.00945532	0.00878806	0.0143376	0.0107165	0.0164495	0.0117786	0.00801665	0.00434184	0.00851348	0.00440563	0.00557748	0.00772156	0.0229192	0.046554	0.0503449	0.0433955	0.0106099	0.0266531
Hexadecane, 4-methyl-	Hydrocarbons	C17H36	25117-26-4	0.00675508	0.00601017	0.0132234	0.0092025	0.00731884	0.00934121	0.0197089	0.0148056	0.0127385	0.0140088	0.0130355	0.00704189	0.00678562	0.0143192	0.0148658	0.0136594	0.0115942	0.00878959	0.00894348	0.0108087	0.0124252	0.0108032	0.0131943	0.00811119	0.0100105	0.00557161	0.0115533	0.00476328	0.00603952	0.00799215	0.021263	0.0540238	0.0497586	0.0406124	0.0104279	0.0269323
Hexane, 3-ethyl-2-methyl-	Hydrocarbons	C9H20	16789-46-1	1.08542	0.765002	1.403	0.949701	0.955373	1.40966	0.388643	0.139068	0.235414	0.31732	0.270074	0.204415	0.0292437	0.229882	0.163414	0.17361	0.0730604	0.111589	0.0704582	0.0868941	0.0683464	0.0647812	0.0823637	0.0959762	0.0689222	0.0510229	0.0589995	0.0318092	0.0657139	0.0345845	0.0819039	0.082361	0.128834	0.0894387	0.0615471	0.0826994
Nonane, 2,6-dimethyl-	Hydrocarbons	C11H24	17302-28-2	0.0245092	0.0245784	0.057761	0.0302648	0.0352629	0.041906	0.0357045	0.0263572	0.0326718	0.0245404	0.0201799	0.0225017	0.0411551	0.0469351	0.0397006	0.0389362	0.0283322	0.0322575	0.0194942	0.0212907	0.0188206	0.0191547	0.0226483	0.0250476	0.0206886	0.0201097	0.0357675	0.0209763	0.020579	0.0247204	0.0248975	0.0365637	0.0330611	0.0299636	0.0256934	0.0289689
Nonane, 5-methyl-5-propyl-	Hydrocarbons	C13H28	17312-75-3	0.079932	0.0730024	0.211745	0.0863095	0.118813	0.150817	0.124228	0.100241	0.108562	0.100251	0.0788977	0.0830559	0.103665	0.170639	0.189416	0.154092	0.0855014	0.0764381	0.0529269	0.0655401	0.0668887	0.0655575	0.0736264	0.075951	0.0730966	0.0315144	0.0919017	0.0268447	0.0297141	0.035441	0.0861482	0.17552	0.144592	0.129654	0.0674357	0.114635
Octane, 5-ethyl-2-methyl-	Hydrocarbons	C11H24	62016-18-6	0.332387	0.254197	0.593854	0.380901	0.582683	0.60057	0.0115718	0.00465672	0.00540752	0.00425675	0.00415544	0.0217896	0.0173031	0.0835942	0.04893	0.067295	0.0214104	0.0327569	0.045577	0.0750263	0.0534143	0.0524258	0.0486422	0.048919	0.0121004	0.00602682	0.0489633	0.0105665	0.0122527	0.0067699	0.165665	0.0376719	0.68022	0.10985	0.0368689	0.0792666
Pentadecane, 2,6,10-trimethyl-	Hydrocarbons	C18H38	3892-00-0	0.0135389	0.00926504	0.0229131	0.0179655	0.0113613	0.0173676	0.0384913	0.0261245	0.0238695	0.0264232	0.0229513	0.0151475	0.0188603	0.0337631	0.0459404	0.0341607	0.0223723	0.021455	0.0262187	0.0301726	0.0365075	0.0279521	0.0389211	0.0291031	0.0250004	0.0155806	0.0233763	0.0162168	0.0173572	0.0216593	0.0585539	0.099963	0.112645	0.0994971	0.0275793	0.0682712
Tetradecane	Hydrocarbons	C14H30	629-59-4	0.121977	0.200375	0.229771	0.135336	0.126594	0.177426	0.165725	0.244475	0.150659	0.27991	0.16706	0.213388	0.189019	0.286152	0.341346	0.281644	0.154074	0.178613	0.12291	0.149356	0.188939	0.141143	0.145486	0.177344	0.155333	0.105466	0.190448	0.0951245	0.123798	0.15123	0.309113	0.461521	0.694743	0.414743	0.247566	0.369988
Tetradecane, 2,6,10-trimethyl-	Hydrocarbons	C17H36	14905-56-7	0.0554027	0.0485115	0.100069	0.0712408	0.0503171	0.0774128	0.128044	0.151919	0.0873918	0.0823768	0.0758817	0.0988341	0.1005	0.119919	0.185332	0.143707	0.118837	0.11007	0.110847	0.127657	0.114072	0.126254	0.169918	0.0961177	0.0796707	0.04412	0.105098	0.0578704	0.0512441	0.0624736	0.14784	0.248622	0.229377	0.285825	0.0855188	0.20126
Tetradecane, 2-methyl-	Hydrocarbons	C15H32	1560-95-8	0.112027	0.102692	0.223869	0.114428	0.120593	0.167147	0.202615	0.167381	0.212492	0.160318	0.121215	0.116109	0.123571	0.223489	0.26525	0.284796	0.11527	0.124199	0.106584	0.13279	0.164524	0.134942	0.173946	0.14622	0.0990768	0.0417642	0.091489	0.0438111	0.0484254	0.0678084	0.27953	0.474482	0.475983	0.462456	0.115424	0.343468
Tetradecane, 4-methyl-	Hydrocarbons	C15H32	25117-24-2	0.118308	0.104999	0.237246	0.121003	0.125173	0.179112	0.217979	0.183238	0.175518	0.165227	0.121858	0.118593	0.119246	0.219459	0.253613	0.245141	0.118529	0.127171	0.096325	0.106021	0.159944	0.132159	0.141744	0.1304	0.0982876	0.043826	0.0956791	0.0448467	0.0492537	0.057634	0.213506	0.389544	0.363565	0.369655	0.113016	0.334428
Tridecane	Hydrocarbons	C13H28	629-50-5	0.0630076	0.129349	0.151104	0.0772824	0.102366	0.120986	0.119615	0.120479	0.109275	0.1391	0.105434	0.115383	0.124851	0.172889	0.160396	0.150886	0.102416	0.102276	0.0678572	0.0885009	0.118636	0.09215	0.0796039	0.100946	0.0985037	0.0676895	0.110367	0.105221	0.120206	0.123006	0.135842	0.241906	0.161604	0.180035	0.194499	0.190691
Tridecane, 2-methyl-	Hydrocarbons	C14H30	1560-96-9	0.0335208	0.0279698	0.063219	0.0370839	0.037898	0.05286	0.0198615	0.0286649	0.0315658	0.0570066	0.0316696	0.0479926	0.024828	0.0466571	0.0494167	0.0385595	0.0169987	0.0420995	0.0140911	0.0201371	0.01817	0.0177961	0.0168979	0.015626	0.0221805	0.00961481	0.0242693	0.010539	0.0101667	0.0132024	0.0303404	0.06457	0.0459764	0.0489443	0.0198798	0.0404997
Undecane	Hydrocarbons	C11H24	1120-21-4	0.670569	0.21211	1.19536	0.179142	0.884769	0.987517	0.258824	0.778591	0.913035	0.75189	0.53444	0.185474	0.56658	1.39832	1.32999	1.10318	0.556735	0.691741	0.397907	0.474567	0.58389	0.476427	0.641865	0.715342	0.19531	0.221087	0.266903	0.327347	0.37602	0.456556	0.598368	0.948064	0.266876	0.817407	0.52381	0.692772
Undecane, 2,4-dimethyl-	Hydrocarbons	C13H28	17312-80-0	0.158834	0.179455	0.411463	0.175414	0.254026	0.303296	0.246936	0.200306	0.217386	0.200856	0.159832	0.164819	0.220204	0.345462	0.377735	0.324343	0.171951	0.187287	0.106215	0.130629	0.13814	0.138797	0.149826	0.160177	0.153072	0.0901049	0.198911	0.0815117	0.0912072	0.107752	0.179583	0.340681	0.291217	0.276082	0.151439	0.238643
Undecane, 2,5-dimethyl-	Hydrocarbons	C13H28	17301-22-3	0.158834	0.179455	0.411463	0.175414	0.254026	0.303296	0.246936	0.200306	0.217386	0.200856	0.159832	0.164819	0.220204	0.345462	0.377735	0.324343	0.171951	0.187287	0.106215	0.130629	0.13814	0.138797	0.149826	0.160177	0.153072	0.0901049	0.198911	0.0815117	0.0912072	0.107752	0.179583	0.340681	0.291217	0.276082	0.151439	0.238643
Undecane, 2,6-dimethyl-	Hydrocarbons	C13H28	17301-23-4	0.158834	0.179455	0.411463	0.175414	0.254026	0.303296	0.246936	0.200306	0.217386	0.200856	0.159832	0.164819	0.220204	0.345462	0.377735	0.324343	0.171951	0.187287	0.106215	0.130629	0.13814	0.138797	0.149826	0.160177	0.153072	0.0901049	0.198911	0.0815117	0.0912072	0.107752	0.179583	0.340681	0.291217	0.276082	0.151439	0.238643
Undecane, 2,9-dimethyl-	Hydrocarbons	C13H28	17301-26-7	0.158834	0.179455	0.411463	0.175414	0.254026	0.303296	0.246936	0.200306	0.217386	0.200856	0.159832	0.164819	0.220204	0.345462	0.377735	0.324343	0.171951	0.187287	0.106215	0.130629	0.13814	0.138797	0.149826	0.160177	0.153072	0.0901049	0.198911	0.0815117	0.0912072	0.107752	0.179583	0.340681	0.291217	0.276082	0.151439	0.238643
Undecane, 3,4-dimethyl-	Hydrocarbons	C13H28	17312-78-6	0.114712	0.0753782	0.152591	0.125193	0.0961535	0.121572	0.189296	0.176182	0.15516	0.163397	0.121907	0.155652	0.161065	0.264069	0.323767	0.244753	0.168347	0.174468	0.193237	0.202495	0.220478	0.175959	0.287068	0.314986	0.154504	0.0817544	0.170678	0.0654816	0.080998	0.074564	0.240972	0.324107	0.299297	0.262973	0.189673	0.223793
Undecane, 3,5-dimethyl-	Hydrocarbons	C13H28	17312-81-1	0.158834	0.179455	0.411463	0.175414	0.254026	0.303296	0.246936	0.200306	0.217386	0.200856	0.159832	0.164819	0.220204	0.345462	0.377735	0.324343	0.171951	0.187287	0.106215	0.130629	0.13814	0.138797	0.149826	0.160177	0.153072	0.0901049	0.198911	0.0815117	0.0912072	0.107752	0.179583	0.340681	0.291217	0.276082	0.151439	0.238643
Undecane, 3,6-dimethyl-	Hydrocarbons	C13H28	17301-28-9	0.158834	0.179455	0.411463	0.175414	0.254026	0.303296	0.246936	0.200306	0.217386	0.200856	0.159832	0.164819	0.220204	0.345462	0.377735	0.324343	0.171951	0.187287	0.106215	0.130629	0.13814	0.138797	0.149826	0.160177	0.153072	0.0901049	0.198911	0.0815117	0.0912072	0.107752	0.179583	0.340681	0.291217	0.276082	0.151439	0.238643
Undecane, 4,4-dimethyl-	Hydrocarbons	C13H28	17312-68-4	0.044752	0.0477745	0.134739	0.0484589	0.0799634	0.0853557	0.0838894	0.0565123	0.0641317	0.057181	0.0435801	0.0473341	0.0697594	0.104869	0.111001	0.104195	0.0456553	0.0518732	0.0294126	0.0370239	0.0463553	0.038435	0.0441436	0.0459831	0.0419712	0.0202464	0.0499504	0.0193281	0.0202151	0.0246032	0.0493621	0.100655	0.0846383	0.0788349	0.0407429	0.0777465
Undecane, 6-ethyl-	Hydrocarbons	C13H28	17312-60-6	0.158834	0.179455	0.411463	0.175414	0.254026	0.303296	0.246936	0.200306	0.217386	0.200856	0.159832	0.164819	0.220204	0.345462	0.377735	0.324343	0.171951	0.187287	0.106215	0.130629	0.13814	0.138797	0.149826	0.160177	0.153072	0.0901049	0.198911	0.0815117	0.0912072	0.107752	0.179583	0.340681	0.291217	0.276082	0.151439	0.238643
1(2H)-Naphthalenone, octahydro-4-hydroxy-, trans-	Ketone	C10H16O2	21766-50-7	0.0991843	0.0579115	0.122228	0.106987	0.0937836	0.124649	0.00584407	0.0117168	0.00671797	0.0137336	0.00577342	0.0109687	0.00594915	0.0325194	0.0200256	0.0463435	0.00828088	0.0203645	0.0368894	0.0376642	0.0410495	0.0296067	0.0358958	0.0442244	0.0350416	0.0301265	0.0517523	0.0220251	0.0233935	0.0281327	0.293075	0.0105955	1.42435	0.155832	0.0165906	0.0929578
2,5-Octanedione	Ketone	C8H14O2	3214-41-3	0.328264	0.345353	0.592488	0.379366	0.635329	0.611235	0.017792	0.00648786	0.00995039	0.0056738	0.286655	0.337307	0.373024	0.771653	0.800711	0.646951	0.367483	0.346497	0.428007	0.390665	0.453228	0.294806	0.573134	0.637013	0.304453	0.223548	0.375753	0.192792	0.214406	0.25651	0.4376	0.670503	0.523661	0.538539	0.420744	0.445541
2-Heptanone, 4,6-dimethyl-	Ketone	C9H18O	19549-80-5	0.00884556	0.00831407	0.0226807	0.0106698	0.0193091	0.0159771	0.0155857	0.0149582	0.0142466	0.0119038	0.010773	0.0108569	0.0149706	0.0234324	0.0187567	0.0206554	0.0151124	0.0254338	0.00573726	0.00720968	0.00656167	0.00698705	0.00721942	0.00851128	0.00717079	0.00702984	0.0123332	0.00683313	0.00720032	0.00862538	0.00844409	0.0129273	0.0120352	0.010849	0.0124269	0.0101205
3,4-Hexanedione, 2,2,5-trimethyl-	Ketone	C9H16O2	20633-03-8	0.63422	0.480841	1.17627	1.2619	1.19478	0.772253	0.461886	0.408401	0.430565	0.351089	0.286655	0.337307	0.373024	0.771653	0.800711	0.646951	0.367483	0.346497	0.428007	0.390665	0.453228	0.294806	0.573134	0.637013	0.304453	0.223548	0.375753	0.192792	0.214406	0.25651	0.4376	0.670503	0.523661	0.538539	0.420744	0.445541
3,5-Octadien-2-one	Ketone	C8H12O	38284-27-4	0.943048	0.675932	1.78931	0.940196	1.06473	1.36864	1.66025	1.25801	1.40997	1.02683	0.767952	1.06307	1.7577	3.378	3.15985	3.53485	1.81199	2.43537	0.873505	0.814301	0.988742	0.744845	1.54027	1.69521	0.919884	0.532129	0.982198	0.397956	0.497878	0.351957	1.475	1.97508	1.45973	1.79751	1.07238	1.42612
3,5-Octadien-2-one, (E,E)-	Ketone	C8H12O	30086-02-3	0.943048	0.675932	1.78931	0.940196	1.06473	1.36864	1.66025	1.25801	1.40997	1.02683	0.767952	1.06307	1.7577	3.378	3.15985	3.53485	1.81199	2.43537	0.873505	0.814301	0.988742	0.744845	1.54027	1.69521	0.919884	0.532129	0.982198	0.397956	0.497878	0.351957	1.475	1.97508	1.45973	1.79751	1.07238	1.42612
4-Hexen-3-one	Ketone	C6H10O	2497-21-4	22.9736	18.446	29.5918	20.637	20.709	28.9885	9.52834	3.6122	5.98018	7.82895	6.58659	5.13431	0.0278192	0.183603	0.161803	0.142084	0.064521	0.0951818	0.0830653	0.0925204	0.109383	0.129287	0.117636	0.0921279	2.59807	1.67322	2.04862	1.24548	2.12424	1.3875	0.069313	0.0840993	0.0990825	0.0823328	0.0549192	0.0707854
5,9-Undecadien-2-one, 6,10-dimethyl-, (E)-	Ketone	C13H22O	3796-70-1	0.0213353	0.0162035	0.0422057	0.0209041	0.0195902	0.0303998	0.0325888	0.0272469	0.0257833	0.034572	0.0134727	0.016035	0.0130419	0.0324551	0.0308832	0.0360199	0.0106621	0.0164525	0.0160448	0.020346	0.023205	0.0226401	0.0260816	0.0221217	0.0180065	0.0127606	0.0184714	0.00905209	0.00959386	0.0106818	0.163661	0.013883	0.610124	0.129573	0.0242301	0.0924139
6,7-Dodecanedione	Ketone	C12H22O2	13757-90-9	0.0280085	0.0211576	0.0358352	0.0286576	0.0191812	0.0298593	0.0584293	0.0521352	0.0462551	0.0518887	0.0426277	0.0399187	0.0406503	0.0720328	0.0829981	0.0624574	0.0463358	0.0403617	0.0584787	0.056319	0.065595	0.0570154	0.0716591	0.0721045	0.0362837	0.0136768	0.0433984	0.0120993	0.0161427	0.0178731	0.0520526	0.103735	0.108973	0.125244	0.0461999	0.0662064
8-Nonen-2-one	Ketone	C9H16O	5009-32-5	0.316585	0.229451	0.461395	0.300976	0.287879	0.383311	0.474804	0.35492	0.396567	0.300874	0.217338	0.299322	0.261548	0.758838	0.885614	0.647155	0.34986	0.428407	0.251134	0.233586	0.271027	0.226976	0.409635	0.448769	0.27658	0.136047	0.277259	0.10388	0.137129	0.127591	0.39188	0.531255	0.491992	0.471803	0.279088	0.373055
Acetylacetone	Ketone	C5H8O2	123-54-6	0.0592161	0.0463779	0.0599918	0.0734427	0.0553546	0.0730271	0.0271217	0.0115859	0.0161225	0.0218942	0.0174573	0.0197614	0.023097	0.0356261	0.0321594	0.0310757	0.0186176	0.0259723	0.010431	0.0216002	0.0142734	0.0157355	0.0072192	0.010104	0.00988376	0.00923301	0.0153746	0.00725701	0.00845104	0.00676422	0.00580881	0.00651055	0.0151145	0.00489899	0.0172156	0.018372
Apocynin	Ketone	C9H10O3	498-02-2	0.0629968	0.0423942	0.083562	0.0665911	0.039983	0.0659597	0.144225	0.127278	0.113665	0.117581	0.0955305	0.0941746	0.0773963	0.191756	0.24131	0.158367	0.106062	0.0962656	0.152097	0.141904	0.174444	0.142814	0.205731	0.209502	0.0644214	0.0301112	0.0806239	0.0234852	0.0342348	0.0426921	0.141528	0.290638	0.190395	0.232555	0.121591	0.184991
Bicyclo[3.1.1]heptan-3-one, 2-hydroxy-2,6,6-trimethyl-	Ketone	C10H16O2	10136-65-9	0.110879	0.121047	0.333257	0.118198	0.176669	0.210532	0.177445	0.13612	0.159275	0.144337	0.11023	0.113091	0.147634	0.257584	0.286169	0.239603	0.112239	0.123278	0.0732439	0.092821	0.103051	0.0971453	0.106527	0.111382	0.092902	0.0688259	0.119469	0.0748747	0.0456675	0.0957529	0.126262	0.274689	0.220862	0.218447	0.0940705	0.186139
Cyclobutanone, 2,2,3-trimethyl-	Ketone	C7H12O	1449-49-6	7.41579	5.17104	9.54116	6.63911	6.46298	9.36047	3.08485	1.00067	1.64622	2.16533	1.82726	1.43664	0.0292437	0.229882	0.163414	0.17361	0.0730604	0.111589	0.0704582	0.0868941	0.0683464	0.0647812	0.0823637	0.0959762	0.663916	0.390652	0.501755	0.205338	0.558135	0.2115	0.0819039	0.082361	0.128834	0.0894387	0.0615471	0.0826994
Cyclohexanone, 2,2,6-trimethyl-	Ketone	C9H16O	2408-37-9	0.0249408	0.0151776	0.0415158	0.0537791	0.0498247	0.029185	0.461886	0.408401	0.430565	0.351089	0.286655	0.337307	0.373024	0.771653	0.800711	0.646951	0.367483	0.346497	0.428007	0.390665	0.453228	0.294806	0.573134	0.637013	0.304453	0.223548	0.375753	0.192792	0.214406	0.25651	0.4376	0.670503	0.523661	0.538539	0.420744	0.445541
Cyclopentanone	Ketone	C5H8O	120-92-3	0.0521205	0.0459509	0.0629067	0.0477914	0.0476762	0.0638357	0.0278158	0.015725	0.0200367	0.0162387	0.0183776	0.015884	0.373024	0.771653	0.800711	0.646951	0.367483	0.346497	0.428007	0.390665	0.453228	0.294806	0.573134	0.637013	0.304453	0.223548	0.375753	0.192792	0.214406	0.25651	0.4376	0.670503	0.523661	0.538539	0.420744	0.445541
Cyclopentanone, 2-(2-hexenyl)-	Ketone	C11H18O	34687-46-2	0.0287695	0.0345525	0.0742898	0.0320475	0.0445111	0.0533553	0.0501951	0.0419016	0.0485854	0.0390111	0.0317068	0.0337621	0.0414499	0.0711915	0.0800678	0.063902	0.0351345	0.0339333	0.0230513	0.0298429	0.032967	0.0287533	0.0333726	0.0298634	0.0289157	0.0157467	0.0347996	0.015682	0.0158092	0.0197741	0.0384537	0.0820492	0.0604184	0.0661926	0.0239238	0.0552037
Ethanone, 1-(3-hydroxyphenyl)-	Ketone	C8H8O2	121-71-1	0.102561	0.0156747	0.0255454	0.126432	0.0554219	0.0716927	0.017287	0.00704719	0.00580345	0.0222923	0.0106625	0.00604066	0.00151864	0.00286095	0.00304837	0.0476063	0.00127351	0.0269721	0.00204611	0.00205205	0.00210172	0.00198469	0.0218303	0.00241723	0.00492836	0.000923624	0.00222399	0.00710015	0.00138257	0.000673578	0.193905	0.015829	0.8704	0.108206	0.0212071	0.0757921
(3R,6S)-2,2,6-Trimethyl-6-vinyltetrahydro-2H-pyran-3-ol	Heterocyclic compound	C10H18O2	39028-58-5	0.114827	0.0999297	0.153068	0.103319	0.0775755	0.138501	0.374343	0.343393	0.266599	0.083592	0.140541	0.215326	0.193771	0.526323	0.78827	0.424981	0.117442	0.134091	0.369571	0.373409	0.482926	0.345779	0.56845	0.550485	0.284809	0.133535	0.230369	0.0817071	0.103162	0.140089	0.444311	0.762332	0.809098	0.699924	0.371458	0.535781
1,2,4,5-Tetrazine-3,6-diAmine	Heterocyclic compound	C2H4N6	19617-90-4	0.0180553	0.0220331	0.0488472	0.0190408	0.0288597	0.0331912	0.0299961	0.0247993	0.0267695	0.024641	0.0200157	0.0196688	0.0273426	0.0428305	0.0508931	0.0400623	0.0207159	0.0222111	0.0139541	0.0193483	0.0189054	0.0175057	0.0191236	0.0186509	0.0192253	0.0115445	0.0240849	0.0107783	0.0110098	0.0136593	0.0229724	0.0489529	0.0376132	0.0372818	0.0169527	0.0332037
1,2,4-Triazine-3,5(2H,4H)-dione	Heterocyclic compound	C3H3N3O2	461-89-2	0.0681779	0.02031	0.139268	0.0664948	0.050437	0.0598414	0.0945462	0.0292848	0.0518007	0.0411697	0.0286763	0.0417339	0.0153208	0.0626064	0.127069	0.0326655	0.0254465	0.0212296	0.0250557	0.0339655	0.0652098	0.0462757	0.0585555	0.102708	0.0635146	0.0179089	0.0247757	0.0139582	0.0147376	0.0150536	0.0830158	0.08104	0.158077	0.0526912	0.0559901	0.0723295
1-Pentanol, 5-[(tetrahydro-2H-pyran-2-yl)oxy]-	Heterocyclic compound	C10H20O3	76102-74-4	0.062016	0.0615264	0.10235	0.0653011	0.0542523	0.0786684	0.123464	0.113957	0.103786	0.104377	0.0958335	0.087547	0.101457	0.154134	0.189373	0.136936	0.0914563	0.101525	0.0969536	0.113059	0.114358	0.110521	0.119915	0.113778	0.0459739	0.0266624	0.0508688	0.0226105	0.0247876	0.0287571	0.143299	0.257819	0.176778	0.193124	0.0873599	0.152462
1-ethenyl-2-Pyrrolidinone	Heterocyclic compound	C6H9NO	88-12-0	0.276644	0.148872	0.750755	0.282601	0.423003	0.398588	0.492606	0.382572	0.420158	0.419307	0.382719	0.321043	0.486805	1.22835	1.20624	1.06622	0.538846	0.604814	0.371268	0.351078	0.40794	0.342088	0.600247	0.67121	0.312543	0.285116	0.347146	0.213101	0.237399	0.284227	0.582578	0.798486	0.501117	0.711109	0.427208	0.559821
1H-Pyrazole-1-carboximidamide, 3,5-dimethyl-	Heterocyclic compound	C6H10N4	22906-75-8	2.50827	1.85673	4.76233	2.50246	2.8578	3.65001	4.68718	3.54627	3.94173	2.87609	2.08266	3.00788	3.22625	7.75736	8.98359	6.5574	3.27856	3.58223	2.33079	2.16554	2.6198	2.0147	4.09713	4.51193	2.49413	1.44573	2.67447	1.04373	1.30845	1.19819	3.8896	5.25305	4.86611	4.76836	2.84756	3.77529
1H-Pyrrole-2,5-dione	Heterocyclic compound	C4H3NO2	541-59-3	0.0414463	0.040379	0.0789175	0.0528113	0.0692817	0.0720403	0.461886	0.408401	0.430565	0.351089	0.286655	0.337307	0.373024	0.771653	0.800711	0.646951	0.367483	0.346497	0.428007	0.390665	0.453228	0.294806	0.573134	0.637013	0.304453	0.223548	0.375753	0.192792	0.214406	0.25651	0.4376	0.670503	0.523661	0.538539	0.420744	0.445541
1H-Pyrrole-2,5-dione, 3-ethyl-4-methyl-	Heterocyclic compound	C7H9NO2	20189-42-8	0.235193	0.186588	0.335198	0.259913	0.219206	0.261712	0.398846	0.356397	0.360802	0.319918	0.235685	0.311901	0.313654	0.619249	0.695193	0.486422	0.334301	0.344929	0.400057	0.413127	0.446596	0.346394	0.621595	0.657875	0.31371	0.156028	0.336992	0.111362	0.145639	0.136614	0.503457	0.711583	0.645723	0.582347	0.388742	0.523239
2(1H)-Pyridinone	Heterocyclic compound	C5H5NO	142-08-5	0.418258	0.335822	0.805676	0.424687	0.447738	0.594021	0.76446	0.570174	0.646891	0.487564	0.368219	0.488888	0.732502	1.40394	1.45018	1.52132	0.60626	1.01914	0.430281	0.400506	0.467303	0.394522	0.699124	0.785714	0.498496	0.220514	0.521629	0.193658	0.203714	0.193797	0.670796	0.904171	0.579482	0.801941	0.470565	0.627593
2(3H)-Furanone, 5-(acetyloxy)dihydro-5-methyl-	Heterocyclic compound	C7H10O4	57681-51-3	0.01405	0.0149909	0.0434764	0.0146304	0.0184976	0.0289673	0.0179523	0.0174195	0.0152511	0.0162687	0.0117609	0.0139801	0.0158467	0.0260747	0.0301754	0.0249647	0.0125532	0.0124121	0.0081283	0.010092	0.0112835	0.0107128	0.0118803	0.0124958	0.0117118	0.00866189	0.0140567	0.00598538	0.00608159	0.00744092	0.0127968	0.0258102	0.0233711	0.0203534	0.012212	0.0177427
2(3H)-Furanone, 5-butyldihydro-4-methyl-	Heterocyclic compound	C9H16O2	39212-23-2	0.00869211	0.0108262	0.0226244	0.0101984	0.0125199	0.0155869	0.0140373	0.0193919	0.0115989	0.0107942	0.00904719	0.0163172	0.0185829	0.0271206	0.0208467	0.0174646	0.015562	0.0148901	0.0107069	0.0133699	0.0131201	0.0155124	0.00883832	0.00854491	0.0154712	0.0098451	0.0174438	0.011064	0.0116508	0.013437	0.0190707	0.0216691	0.0181004	0.0286778	0.0146834	0.0169422
2(5H)-Furanone, 5-ethyl-3-hydroxy-4-methyl-	Heterocyclic compound	C7H10O3	698-10-2	0.859544	0.693465	1.33602	0.917629	0.855772	1.04857	1.48541	1.31573	1.31157	1.15675	0.846579	1.11638	1.0399	2.10104	2.35501	1.52291	1.09312	1.18787	1.27111	1.37626	1.43974	1.16201	2.22838	2.11525	1.14605	0.599485	1.17096	0.462152	0.569237	0.542381	1.70737	2.19495	2.15265	2.02748	1.22811	1.64891
2,2'-Isopropylidenebis(5-methylfuran)	Heterocyclic compound	C13H16O2	59212-75-8	0.00122512	0.00080889	0.00245764	0.000515206	0.00103457	0.00159226	0.194739	0.16528	0.31959	0.106112	0.65662	0.252111	1.10276	2.2376	2.16622	1.02646	1.35648	3.01998	0.0365804	0.0384746	0.037849	0.0355257	0.0539608	0.0606755	0.0691576	0.040966	0.0515942	0.0242402	0.0274156	0.0254357	0.16616	0.0588765	0.557442	0.115753	0.0426741	0.0925997
2,5-Pyrrolidinedione, 1-ethyl-	Heterocyclic compound	C6H9NO2	2314-78-5	0.014636	0.0122473	0.0240227	0.0172199	0.0106079	0.0187247	0.0437714	0.0516733	0.0383431	0.0238934	0.0170871	0.0229743	0.0324393	0.0339233	0.0379109	0.0242558	0.0217996	0.0234426	0.0465173	0.0434173	0.0503662	0.0434653	0.0723565	0.0680234	0.0488383	0.0303528	0.0586589	0.0297153	0.0318011	0.0306641	0.055043	0.0876113	0.0677255	0.0646904	0.0444462	0.055848
2-(2-Acetoxy-1-propyl)furan, (S)	Heterocyclic compound	C9H12O3	60830-70-8	0.010964	0.00979753	0.0164086	0.0103647	0.0120194	0.0115049	0.0160481	0.0149794	0.017182	0.015589	0.0109901	0.0135919	0.0106719	0.00639012	0.0220841	0.00710489	0.00548157	0.0189621	0.025748	0.0265768	0.0298327	0.023079	0.0370178	0.0362137	0.017074	0.00989997	0.016007	0.00872023	0.0092281	0.0110095	0.00824462	0.0117176	0.00959498	0.00864709	0.00579156	0.00824416
2-Acetylpyrrolidine	Heterocyclic compound	C6H11NO	60026-20-2	0.0492623	0.0527314	0.146566	0.0638312	0.0746214	0.0971787	0.461886	0.408401	0.430565	0.351089	0.286655	0.337307	0.373024	0.771653	0.800711	0.646951	0.367483	0.346497	0.428007	0.390665	0.453228	0.294806	0.573134	0.637013	0.304453	0.223548	0.375753	0.192792	0.214406	0.25651	0.4376	0.670503	0.523661	0.538539	0.420744	0.445541
2-Ethoxy-3-methylpyrazine	Heterocyclic compound	C7H10N2O	32737-14-7	0.214318	0.14967	0.333742	0.216653	0.208774	0.244336	0.315425	0.221759	0.23809	0.187149	0.136292	0.212424	0.163052	0.420315	0.515103	0.306049	0.208062	0.226477	0.259929	0.285834	0.230122	0.262571	0.376113	0.352421	0.251046	0.133604	0.219935	0.155405	0.159342	0.149387	0.352801	0.383069	0.43673	0.363937	0.301078	0.337517
2-Furanpropanoic acid, ethyl ester	Heterocyclic compound	C9H12O3	10031-90-0	0.0454779	0.0402461	0.0667863	0.0489999	0.0523812	0.0517479	0.0552658	0.0625181	0.0485452	0.0339039	0.0221313	0.0345848	0.0494805	0.104495	0.120895	0.0487092	0.0588458	0.0348678	0.0635183	0.0678336	0.0675388	0.0544967	0.109655	0.104945	0.0499074	0.0284528	0.0555158	0.018992	0.0288028	0.0237517	0.0908692	0.114079	0.106423	0.103781	0.0665507	0.0862977
2-Hexanoylfuran	Heterocyclic compound	C10H14O2	14360-50-0	2.26583	1.82389	3.58427	2.44329	2.09914	2.75803	4.28199	3.53413	3.5654	3.14637	2.27845	3.07141	3.09019	6.15119	7.42222	4.7653	3.2697	3.38315	3.97515	4.17134	4.45962	3.50708	6.6218	6.69175	3.04134	1.55931	3.28994	1.19453	1.48481	1.47201	4.9817	7.56868	6.50793	6.18733	3.80334	5.09486
2-Hydroxymethylbenzimidazole	Heterocyclic compound	C8H8N2O	22128-99-0	0.032211	0.0295266	0.0519052	0.0443886	0.0481864	0.0547927	0.00671763	0.106668	0.0433125	0.0436105	0.00390413	0.028013	0.013061	0.319663	0.0887616	0.16215	0.028688	0.0668775	0.000192043	0.0219604	0.000623405	0.000438899	0.000388159	0.00030008	0.000168378	0.000295391	0.000446847	0.0137843	0.0162348	0.000390754	0.0413599	0.00293528	0.155478	0.045152	0.0357258	0.0656519
2-Isobutylthiazole	Heterocyclic compound	C7H11NS	18640-74-9	0.0187417	0.0198875	0.0526966	0.023487	0.0294448	0.0346811	0.030057	0.0222327	0.0256712	0.0215926	0.0185108	0.018954	0.0233408	0.0397471	0.0360289	0.0329012	0.0223726	0.0242655	0.0157213	0.0184286	0.0157296	0.0171829	0.0190854	0.0212182	0.0176876	0.0194648	0.030992	0.0199505	0.0197995	0.0221358	0.0216553	0.0311491	0.0300548	0.0261578	0.0203312	0.0245765
2-Methyl-1,3-dithiacyclopentane	Heterocyclic compound	C4H8S2	5616-51-3	0.0241031	0.0199392	0.0404844	0.0258791	0.0337228	0.0292801	0.0382855	0.0658932	0.0344084	0.0264559	0.0202001	0.0231769	0.0226536	0.0436134	0.0340964	0.0453321	0.0327429	0.0363523	0.0228036	0.0249568	0.0254365	0.0246548	0.0248718	0.0270882	0.0225849	0.017695	0.0274407	0.0124951	0.013555	0.015468	0.0285615	0.038308	0.0346581	0.0414596	0.0280353	0.032858
2-Piperidinimine	Heterocyclic compound	C5H10N2	22780-54-7	0.173183	0.0958906	0.210725	0.201947	0.186447	0.211818	0.14128	0.050644	0.0406933	0.351089	0.286655	0.049012	0.373024	0.771653	0.800711	0.646951	0.367483	0.346497	0.428007	0.390665	0.453228	0.294806	0.573134	0.637013	0.304453	0.223548	0.375753	0.192792	0.214406	0.25651	0.052822	0.0759141	0.0854024	0.0640795	0.0547275	0.0514109
2-Thiophenemethanethiol	Heterocyclic compound	C5H6S2	6258-63-5	0.387361	0.287143	0.735439	0.384983	0.44325	0.5638	0.726638	0.54331	0.601538	0.442105	0.319662	0.461215	0.481698	1.17371	1.36948	0.991212	0.513962	0.619091	0.356339	0.330188	0.403882	0.298675	0.627819	0.692222	0.380404	0.225813	0.408383	0.165605	0.203718	0.191865	0.595651	0.80271	0.747817	0.728709	0.480919	0.57754
2H-1-Benzopyran-2-one, 3-methyl-	Heterocyclic compound	C10H8O2	2445-82-1	0.0745849	0.0500193	0.0861216	0.0832917	0.0462355	0.0748889	0.19371	0.143032	0.128726	0.136799	0.139099	0.113665	0.11092	0.281589	0.317173	0.170141	0.131707	0.130855	0.148592	0.143822	0.183291	0.144217	0.196597	0.198808	0.0770148	0.024905	0.0994221	0.0230277	0.0342857	0.0404269	0.16254	0.303412	0.326598	0.292629	0.125074	0.230331
2H-Indol-2-one, 1,3-dihydro-	Heterocyclic compound	C8H7NO	59-48-3	0.365038	0.30033	0.44353	0.390264	0.23193	0.375734	0.915805	0.681282	0.717285	0.673386	0.680303	0.526872	0.487137	0.943966	1.44353	0.826151	0.582306	0.531452	0.783937	0.760542	1.08417	0.735546	1.21971	1.22783	0.404683	0.142412	0.535881	0.140011	0.200033	0.184789	0.850658	1.8618	1.2097	1.46423	0.761168	1.16166
2H-Pyran-2-one, tetrahydro-6-methyl-	Heterocyclic compound	C6H10O2	823-22-3	0.0799272	0.0721798	0.220409	0.0802963	0.126937	0.16592	0.188874	0.141588	0.162316	0.16089	0.111724	0.165637	0.248749	0.537047	0.525996	0.507278	0.248411	0.358868	0.112841	0.110515	0.122938	0.106713	0.176868	0.200019	0.09415	0.0808553	0.103937	0.0628521	0.0711737	0.0751547	0.174667	0.238093	0.14172	0.208636	0.126297	0.16729
2H-Pyran-3-ol, 6-ethenyltetrahydro-2,2,6-trimethyl-	Heterocyclic compound	C10H18O2	14049-11-7	0.114827	0.0999297	0.153068	0.103319	0.0775755	0.138501	0.374343	0.343393	0.266599	0.083592	0.140541	0.215326	0.193771	0.526323	0.78827	0.424981	0.117442	0.134091	0.369571	0.373409	0.482926	0.345779	0.56845	0.550485	0.284809	0.133535	0.230369	0.0817071	0.103162	0.140089	0.444311	0.762332	0.809098	0.699924	0.371458	0.535781
3-Acetyl-2,5-dimethyl furan	Heterocyclic compound	C8H10O2	10599-70-9	0.119946	0.10047	0.226082	0.12066	0.1519	0.186932	0.460909	0.352602	0.377133	0.286523	0.276467	0.321477	0.813289	1.55927	0.194809	1.50526	0.79763	1.15585	0.12493	0.124897	0.126687	0.107326	0.187413	0.211264	0.127938	0.0709855	0.151368	0.055144	0.061368	0.0671609	0.172592	0.237227	0.21518	0.215845	0.141571	0.177603
5-Ethylhydantoin	Heterocyclic compound	C5H8N2O2	15414-82-1	0.0394868	0.03693	0.0759964	0.0394901	0.0579983	0.056302	0.0924812	0.0696157	0.0765845	0.0558522	0.0360312	0.0572234	0.0658023	0.148379	0.173002	0.126505	0.0562499	0.0709614	0.0449923	0.0406201	0.043516	0.0367888	0.0612846	0.0847076	0.0453928	0.0286361	0.0510387	0.0229673	0.027133	0.0268152	0.0726922	0.100121	0.0741805	0.0919788	0.0608537	0.072658
5-Methyloxazolidine	Heterocyclic compound	C4H9NO	58328-22-6	0.848122	0.516395	0.956486	0.996202	0.726886	1.13453	0.369929	0.143988	0.196737	0.292473	0.265767	0.213593	0.373024	0.771653	0.800711	0.646951	0.367483	0.346497	0.428007	0.390665	0.453228	0.294806	0.573134	0.637013	0.304453	0.223548	0.375753	0.192792	0.214406	0.25651	0.4376	0.670503	0.523661	0.538539	0.420744	0.445541
5-Thiazoleethanol, 4-methyl-	Heterocyclic compound	C6H9NOS	137-00-8	0.0471557	0.0572998	0.133468	0.0533993	0.077401	0.0918142	0.0816796	0.0686389	0.0766411	0.0687469	0.0529129	0.0533952	0.0718127	0.119541	0.137471	0.109578	0.0545189	0.0603865	0.0352393	0.046608	0.0521256	0.0481246	0.0537876	0.0507613	0.0500838	0.0303558	0.06213	0.0262361	0.027076	0.0334168	0.0639943	0.13009	0.102772	0.105121	0.0464652	0.0882043
Arecoline	Heterocyclic compound	C8H13NO2	63-75-2	0.0208945	0.0224084	0.0374935	0.0312127	0.0218988	0.0290831	0.0435256	0.0406589	0.0409044	0.0372276	0.0263716	0.0300562	0.0368472	0.072621	0.0882104	0.0544104	0.0374733	0.0395692	0.0432888	0.0459517	0.0483299	0.0350655	0.0718287	0.0720405	0.0387235	0.0142966	0.0430453	0.0163708	0.0159503	0.0197633	0.0563615	0.0579534	0.0510465	0.0477061	0.0438417	0.0593541
Ethanone, 1-(1H-pyrrol-2-yl)-	Heterocyclic compound	C6H7NO	1072-83-9	0.286296	0.14735	0.421247	0.296933	0.290729	0.338536	0.382459	0.196661	0.308127	0.206579	0.211084	0.212062	0.30297	0.656368	0.745659	0.547854	0.322582	0.382153	0.40307	0.330215	0.353135	0.308199	0.534507	0.525147	0.281574	0.143321	0.279459	0.113919	0.143464	0.137798	0.458719	0.500664	0.606646	0.53381	0.378673	0.42602
Ethanone, 1-(2-methyl-1,3-dithiolan-2-yl)-	Heterocyclic compound	C6H10OS2	33266-07-8	0.0152594	0.0108055	0.0163574	0.0156817	0.0107262	0.0170152	0.0285158	0.0225492	0.02287	0.0216211	0.0142504	0.020419	0.0280064	0.0407196	0.0507346	0.0335122	0.0274062	0.0310538	0.031055	0.033228	0.0350261	0.0278421	0.0505688	0.0491075	0.0221999	0.0109952	0.0209872	0.0152648	0.0148462	0.0142053	0.0391286	0.0573107	0.05559	0.0470686	0.0304609	0.0393473
Ethanone, 1-(2-thienyl)-	Heterocyclic compound	C6H6OS	88-15-3	0.0476964	0.0359602	0.0938254	0.0461889	0.0538843	0.0692046	0.143476	0.101582	0.100865	0.0715926	0.0632822	0.0885423	0.0842983	0.180704	0.175155	0.161995	0.0843428	0.116171	0.0547603	0.0528893	0.0488751	0.0455175	0.0798287	0.0877396	0.0532081	0.0286533	0.0592015	0.0261839	0.0297913	0.0296954	0.0629663	0.0813588	0.0777173	0.091222	0.0456831	0.0724771
Furan, 2-propyl-	Heterocyclic compound	C7H10O	4229-91-8	0.294817	0.178353	0.325539	0.349962	0.250743	0.392462	0.134671	0.0458576	0.0651449	0.0952616	0.0853731	0.0700787	0.0214378	0.101877	0.065791	0.0650685	0.0217971	0.0315116	0.0612943	0.0831518	0.101447	0.12654	0.0925387	0.0509529	0.0278575	0.020819	0.0451103	0.0217364	0.018589	0.021591	0.115807	0.0389432	0.442943	0.0855	0.0353989	0.0649859
Furo[3,4-c]pyridin-1(3H)-one, 7-hydroxy-6-methyl-	Heterocyclic compound	C8H7NO3	4753-19-9	0.194477	0.130222	0.256013	0.206074	0.123716	0.202782	0.470176	0.413388	0.365056	0.387	0.271985	0.291166	0.229437	0.558094	0.701805	0.473798	0.31017	0.250683	0.429335	0.413493	0.546989	0.394165	0.597483	0.593005	0.199255	0.0708457	0.26278	0.0572157	0.0866402	0.104002	0.409383	0.907768	0.654972	0.738938	0.365215	0.587583
Pyrazinamide	Heterocyclic compound	C5H5N3O	98-96-4	0.175312	0.155762	0.264726	0.191202	0.160289	0.206818	0.328181	0.295985	0.303073	0.285447	0.205311	0.265741	0.265617	0.519875	0.580222	0.419527	0.282417	0.299726	0.339728	0.360478	0.394994	0.313134	0.57241	0.56194	0.275369	0.140115	0.296342	0.111949	0.135938	0.138731	0.450899	0.677334	0.585243	0.539115	0.321705	0.436238
Pyrazine, 2-methoxy-3-(1-methylethyl)-	Heterocyclic compound	C8H12N2O	25773-40-4	0.0211432	0.0109879	0.0335985	0.0022573	0.0185506	0.0201171	2.11689	1.53943	1.6296	1.34881	1.71736	1.63293	6.84034	12.2969	9.76147	12.1314	6.66506	11.0451	0.201723	0.184822	0.256424	0.211286	0.318375	0.362859	0.161543	0.0851417	0.00368517	0.00102946	0.00101645	0.000798359	0.295151	0.378952	0.371576	0.349647	0.274749	0.280396
Pyrazine, tetramethyl-	Heterocyclic compound	C8H12N2	1124-11-4	0.0572757	0.0501903	0.109026	0.0611491	0.0545401	0.0862541	0.109807	0.0898766	0.0796709	0.109799	0.115255	0.0829441	0.210798	0.467319	0.406501	0.462347	0.195633	0.35652	0.064004	0.0616712	0.0740174	0.0503077	0.0983566	0.110821	0.0718536	0.0572646	0.0763959	0.0411849	0.0435288	0.0446108	0.0943251	0.124502	0.0998334	0.110513	0.0745214	0.0877043
Thiazole, 5-ethenyl-4-methyl-	Heterocyclic compound	C6H7NS	1759-28-0	0.00832823	0.00341152	0.0113955	0.00859259	0.00975254	0.0280849	0.483991	0.217119	0.202271	0.441689	0.262351	0.307532	0.373024	0.771653	0.800711	0.646951	0.367483	0.346497	0.428007	0.390665	0.453228	0.294806	0.573134	0.637013	0.304453	0.223548	0.375753	0.192792	0.214406	0.25651	0.4376	0.670503	0.523661	0.538539	0.420744	0.445541
Thiophene, 2-pentyl-	Heterocyclic compound	C9H14S	4861-58-9	0.0414951	0.0294151	0.0610529	0.0591303	0.0560036	0.0840777	0.0292509	0.0318637	0.0198875	0.0126227	0.0122081	0.0171276	0.0164661	0.05796	0.0764511	0.032418	0.00910817	0.0116102	0.108888	0.237329	0.147376	0.145498	0.104082	0.0945357	0.0285844	0.0356622	0.0473362	0.0115656	0.0203987	0.0315524	0.0230679	0.0375595	0.0552828	0.0363335	0.020178	0.0305086
Tropinone	Heterocyclic compound	C8H13NO	532-24-1	0.0100287	0.00801449	0.016857	0.0104155	0.00991107	0.0122223	0.0187172	0.0157832	0.0160712	0.0142108	0.010339	0.0137066	0.0114301	0.0239094	0.0279702	0.0164059	0.0129945	0.0150399	0.0143104	0.0153599	0.0134628	0.0124435	0.0243546	0.0203297	0.0136557	0.00593679	0.0117631	0.00456097	0.00603728	0.00538172	0.0193476	0.0246461	0.0245718	0.0223717	0.0141101	0.0194188
.delta.-Dodecalactone	Ester	C12H22O2	713-95-1	0.00971285	0.0144423	0.0133644	0.0123677	0.00456964	0.0103242	0.0322522	0.0208433	0.015268	0.0200103	0.0158938	0.0104765	0.00894192	0.01833	0.030696	0.0240197	0.0140958	0.0125672	0.0220725	0.0223997	0.0305511	0.0225324	0.0410725	0.0270005	0.0169919	0.0113346	0.0196194	0.0136757	0.0142901	0.0165797	0.0516099	0.0902278	0.0627382	0.091501	0.0264662	0.0576239
1-Butanol, 3-methyl-, formate	Ester	C6H12O2	110-45-2	2.14358	1.22694	2.36605	2.56793	1.83932	2.85455	0.901228	0.311492	0.403317	0.656169	0.587859	0.421303	0.373024	0.771653	0.800711	0.646951	0.367483	0.346497	0.428007	0.390665	0.453228	0.294806	0.573134	0.637013	0.304453	0.223548	0.375753	0.192792	0.214406	0.25651	0.4376	0.670503	0.523661	0.538539	0.420744	0.445541
2(3H)-Furanone, 5-ethyldihydro-	Ester	C6H10O2	695-06-7	0.135529	0.141176	0.400125	0.175935	0.214107	0.266556	0.213444	0.157131	0.182634	0.143969	0.123612	0.131613	0.178907	0.277091	0.251988	0.238187	0.157178	0.180741	0.0997186	0.117479	0.103648	0.111875	0.131428	0.144767	0.119003	0.120652	0.215095	0.123952	0.122459	0.145388	0.149302	0.218805	0.207439	0.186165	0.131669	0.16573
2,4-Decadienoic acid, ethyl ester, (E,Z)-	Ester	C12H20O2	3025-30-7	0.267597	0.176529	0.354736	0.283645	0.17372	0.28191	0.641579	0.56325	0.498684	0.530675	0.422608	0.403273	0.35528	0.776038	0.978299	0.6544	0.432552	0.385708	0.603648	0.578944	0.751575	0.55951	0.824656	0.818765	0.301242	0.122255	0.406659	0.097765	0.133565	0.159536	0.571112	1.21973	1.13853	0.999961	0.503817	0.781583
2,4-Hexadienoic acid, ethyl ester, (2E,4E)-	Ester	C8H12O2	2396-84-1	0.0428704	0.0339259	0.067339	0.0361513	0.0502387	0.0514213	0.0786651	0.0594711	0.0550707	0.0502409	0.0337647	0.0505503	0.0562588	0.129518	0.151637	0.110158	0.0522851	0.0708275	0.0400505	0.0364235	0.0410621	0.0360876	0.0584411	0.0645415	0.0468203	0.0205027	0.0457317	0.0267904	0.0235663	0.020422	0.0565222	0.0840003	0.0688494	0.076894	0.0447928	0.0633354
2,6-Octadienoic acid, 3,7-dimethyl-, methyl ester	Ester	C11H18O2	2349-14-6	0.0183353	0.0268649	0.0364061	0.0203722	0.0284843	0.0260118	0.0283268	0.0328127	0.0293249	0.0328853	0.0243971	0.0271869	0.0300711	0.052692	0.0590633	0.0483264	0.0257932	0.0265127	0.0166462	0.0235516	0.0268596	0.0224604	0.0249386	0.02533	0.0233903	0.0109212	0.0280126	0.01099	0.0106807	0.0150636	0.0289501	0.0640094	0.0482642	0.0498852	0.0183291	0.0406479
2-Butenoic acid, 3-hexenyl ester, (E,Z)-	Ester	C10H16O2	65405-80-3	0.013994	0.0171792	0.0357481	0.0165982	0.013512	0.0179611	0.0260689	0.0193425	0.0172526	0.0171047	0.0145504	0.0182684	0.0324584	0.0376507	0.0440813	0.0239762	0.0405722	0.0223979	0.0404796	0.0449587	0.0456955	0.0291876	0.0535831	0.0562976	0.0286948	0.0288038	0.0387313	0.0204208	0.0244486	0.0226398	0.0492035	0.0565643	0.0441484	0.052992	0.0419156	0.0468953
2-Butenoic acid, 3-methyl-, methyl ester	Ester	C6H10O2	924-50-5	21.3831	15.8228	27.8298	19.2079	19.4904	29.0223	8.25322	3.20155	5.20688	6.84477	5.80728	4.55387	0.373024	0.771653	0.800711	0.646951	0.367483	0.346497	0.428007	0.390665	0.453228	0.294806	0.573134	0.637013	0.304453	0.223548	0.375753	0.192792	0.214406	0.25651	0.4376	0.670503	0.523661	0.538539	0.420744	0.445541
2-Octenoic acid, ethyl ester	Ester	C10H18O2	2351-90-8	0.382794	0.305454	0.506679	0.423854	0.372675	0.415186	0.703259	0.595789	0.61748	0.566173	0.40499	0.525941	0.518416	1.03845	1.24753	0.843845	0.554232	0.588388	0.660323	0.705367	0.777257	0.611421	1.11108	1.11027	0.535358	0.266944	0.587492	0.203443	0.256798	0.241189	0.868001	1.35934	1.15209	1.07647	0.623586	0.871703
2-Phenoxyethyl isobutyrate	Ester	C12H16O3	103-60-6	0.0943122	0.0643619	0.105994	0.104039	0.0599727	0.0953274	0.202077	0.158628	0.159446	0.169853	0.147713	0.138614	0.126774	0.25689	0.321714	0.193913	0.152299	0.138772	0.188597	0.183521	0.250915	0.175625	0.242883	0.272867	0.103035	0.0417052	0.11194	0.0329274	0.0467888	0.0559796	0.200795	0.418337	0.225366	0.278147	0.165338	0.222545
2-Propenoic acid, 2-methoxyethyl ester	Ester	C6H10O3	3121-61-7	0.55196	0.386752	0.684589	0.477028	0.475444	0.739323	0.194206	0.0708972	0.118761	0.15975	0.134575	0.106902	0.373024	0.771653	0.800711	0.646951	0.367483	0.346497	0.428007	0.390665	0.453228	0.294806	0.573134	0.637013	0.304453	0.223548	0.375753	0.192792	0.214406	0.25651	0.4376	0.670503	0.523661	0.538539	0.420744	0.445541
2-Propenoic acid, pentyl ester	Ester	C8H14O2	2998-23-4	0.189228	0.131993	0.323203	0.211211	0.296386	0.296298	0.0538345	0.0307133	0.0349011	0.0268923	0.0226433	0.0280396	0.0173031	0.0835942	0.04893	0.067295	0.0214104	0.0327569	0.045577	0.0750263	0.0534143	0.0524258	0.0486422	0.048919	0.0266754	0.0237111	0.0824924	0.0361825	0.0314939	0.0232692	0.165665	0.0376719	0.68022	0.10985	0.0368689	0.0792666
3-Hexen-1-ol, propanoate, (Z)-	Ester	C9H16O2	33467-74-2	0.657588	0.577467	1.24719	0.655239	0.917593	0.93097	1.2026	0.912108	1.00112	0.948498	0.67408	0.774548	0.921128	2.49543	2.91441	2.09314	0.99537	1.22115	0.707371	0.65936	0.702532	0.430526	1.02289	1.48754	0.481818	0.296193	0.511712	0.255537	0.271606	0.265962	1.27102	1.31087	1.21369	1.56853	0.904163	1.21603
3-Methylheptyl acetate	Ester	C10H20O2	72218-58-7	0.268575	0.26002	0.711257	0.271568	0.616396	0.541506	0.665089	0.500746	0.563068	0.425652	0.316473	0.432709	0.51278	1.07687	1.23639	0.91567	0.519306	0.604762	0.361284	0.306572	0.384802	0.332396	0.568593	0.63518	0.302922	0.201235	0.224883	0.189105	0.232406	0.160563	0.550009	0.759555	0.481513	0.671598	0.475665	0.538703
3-Octen-1-ol, acetate, (Z)-	Ester	C10H18O2	69668-83-3	0.0266556	0.0197118	0.0417125	0.0294109	0.0333795	0.0322275	0.0483328	0.0424714	0.0390355	0.0364928	0.024966	0.0298869	0.0288037	0.0611671	0.070343	0.0412574	0.0308256	0.0339158	0.0362976	0.0422564	0.0390175	0.0295119	0.0632454	0.0573516	0.0300151	0.0144185	0.0258736	0.0134924	0.0146604	0.0126309	0.0548769	0.0712445	0.0553947	0.0621487	0.0367225	0.0500518
4-Methylhexyl 3-methylbutanoate	Ester	C12H24O2	1215127-80-2	0.0131912	0.0138023	0.0336215	0.0122164	0.0136329	0.0156006	0.0150857	0.0102399	0.0139522	0.0118535	0.0124985	0.00931476	0.0185481	0.0264434	0.022569	0.0175429	0.0124222	0.01384	0.00538122	0.00994458	0.0129755	0.00651559	0.00884668	0.00924493	0.0117346	0.00587157	0.00864376	0.00449646	0.00462522	0.00619874	0.0154547	0.0363202	0.0170839	0.0185161	0.00645445	0.0247678
4-Penten-1-ol, propanoate	Ester	C8H14O2	30563-30-5	0.364365	0.257625	0.66295	0.429903	0.582592	0.607828	0.0254035	0.0076115	0.0202183	0.0124904	0.00470366	0.0103396	0.0173031	0.0835942	0.04893	0.067295	0.0214104	0.0327569	0.045577	0.0750263	0.0534143	0.0524258	0.0486422	0.048919	0.020669	0.012534	0.0993153	0.014278	0.00798707	0.0114311	0.165665	0.0376719	0.68022	0.10985	0.0368689	0.0792666
Acetic acid, heptyl ester	Ester	C9H18O2	112-06-1	0.0423696	0.0511362	0.065881	0.0676825	0.0497418	0.0571893	0.0707995	0.0563901	0.0604096	0.0479642	0.0298361	0.061908	0.019545	0.0857616	0.0731518	0.0459054	0.0256897	0.0324507	0.0221582	0.0218928	0.0327323	0.0236729	0.0377685	0.0377169	0.0791558	0.0255479	0.0863615	0.0150207	0.0178122	0.023847	0.0252026	0.0415213	0.108	0.0320366	0.0322393	0.0262537
Acetic acid, phenyl ester	Ester	C8H8O2	122-79-2	0.0221042	0.399914	0.0334456	0.0259033	0.0171157	0.0213423	0.461886	0.408401	0.430565	0.351089	0.286655	0.337307	0.373024	0.771653	0.800711	0.646951	0.367483	0.346497	0.428007	0.390665	0.453228	0.294806	0.573134	0.637013	0.304453	0.223548	0.375753	0.192792	0.214406	0.25651	0.0229339	0.0318728	0.0393809	0.0290769	0.420744	0.0268245
Benzeneacetic acid, ethyl ester	Ester	C10H12O2	101-97-3	0.0296824	0.0205581	0.0413124	0.0350638	0.0174379	0.0333764	0.0554132	0.0459861	0.0461832	0.0408194	0.0323441	0.0394257	0.0420242	0.0858678	0.0994531	0.0650158	0.0463941	0.0499156	0.0523391	0.055277	0.0665206	0.0490051	0.0908398	0.0901711	0.0408307	0.0195483	0.0415675	0.0173294	0.0187555	0.0287307	0.0797187	0.105286	0.170395	0.0847681	0.0588091	0.0702619
Benzoic acid, 4-ethoxy-, ethyl ester	Ester	C11H14O3	23676-09-7	0.0612949	0.0427641	0.0746191	0.0514478	0.0315226	0.0651499	0.0411397	0.140443	0.098696	0.0349583	0.0205206	0.0707169	0.0948438	0.367724	0.244327	0.254041	0.114233	0.0552125	0.145093	0.10997	0.129227	0.0493626	0.160903	0.215097	0.0766795	0.0850822	0.114513	0.0712258	0.0921824	0.108166	0.134287	0.170134	0.0832677	0.133201	0.200597	0.126225
Benzyl angelate	Ester	C12H14O2	37526-87-7	0.173472	0.116342	0.291672	0.203942	0.24206	0.277727	0.0116427	0.0228922	0.0155388	0.0244514	0.0123569	0.0277487	0.014206	0.0823309	0.0497555	0.116255	0.0212244	0.0504246	0.0386429	0.0418688	0.0449218	0.037583	0.0234187	0.0416934	0.0327513	0.027491	0.0609952	0.0206362	0.0207603	0.0236748	0.758068	0.00650549	3.45137	0.395922	0.0404826	0.242284
Benzyl tiglate	Ester	C12H14O2	37526-88-8	0.497432	0.331437	0.552908	0.563626	0.317261	0.51234	0.978826	0.858142	0.768235	0.871498	0.755867	0.667708	0.639012	1.1737	1.50605	1.02873	0.78163	0.53057	0.968678	0.950798	1.20918	0.899289	1.31234	1.32969	0.427957	0.209301	0.671688	0.161959	0.236674	0.280553	1.06605	2.08294	1.32094	1.49649	0.870207	1.20815
Bicyclo[3.1.1]hept-2-en-6-ol, 2,7,7-trimethyl-, acetate, [1S-(1.alpha.,5.alpha.,6.beta.)]-	Ester	C12H18O2	50764-55-1	0.00903399	0.00874854	0.0142982	0.0108379	0.00684554	0.0108169	0.0173972	0.013034	0.0133589	0.0118219	0.00989939	0.0122756	0.0179592	0.0300553	0.0339202	0.0202595	0.0150641	0.0187503	0.0172524	0.0180773	0.0223803	0.0200549	0.0245659	0.0348778	0.0133062	0.0113638	0.014279	0.0106072	0.0113667	0.0108404	0.0213151	0.0272041	0.0279583	0.0269146	0.0211536	0.0216538
Butanoic acid, 1,1-dimethyl-2-phenylethyl ester	Ester	C14H20O2	10094-34-5	0.0502296	0.0362634	0.0585392	0.0529278	0.0329647	0.0508888	0.242877	0.164154	0.156557	0.101677	0.222624	0.131617	0.141411	0.465965	0.463695	0.188274	0.182684	0.201242	0.108509	0.106952	0.129913	0.086666	0.141101	0.151573	0.0553194	0.0121041	0.0640071	0.0114227	0.013891	0.018457	0.197477	0.236631	0.481172	0.378923	0.094906	0.287991
Butanoic acid, 1,7,7-trimethylbicyclo[2.2.1]hept-2-yl ester, endo-	Ester	C14H24O2	13109-70-1	0.0360173	0.0336552	0.0751699	0.040691	0.0417968	0.063832	0.0989551	0.0835897	0.0790825	0.0594004	0.0504745	0.0473238	0.0547854	0.117787	0.141309	0.103109	0.0560112	0.0532036	0.0573414	0.0652297	0.0708417	0.0645374	0.101158	0.0711219	0.047646	0.0249782	0.0537708	0.0235526	0.026732	0.0320405	0.103689	0.188359	0.172944	0.135856	0.0517026	0.109939
Butanoic acid, 2-methyl-, 2-methylpropyl ester	Ester	C9H18O2	2445-67-2	0.028886	0.0269738	0.0695747	0.0364014	0.0626761	0.0497346	0.0383135	0.0298301	0.0340484	0.0252611	0.0211926	0.0250743	0.0325871	0.049742	0.040694	0.0422087	0.0308261	0.0321731	0.0201979	0.0237146	0.0208481	0.0215241	0.0254557	0.0269919	0.0222294	0.0237455	0.0397634	0.0230233	0.0238763	0.0279819	0.0283588	0.0388878	0.0353066	0.0334058	0.0260671	0.0311695
Butanoic acid, 2-methyl-, 2-phenylethyl ester	Ester	C13H18O2	24817-51-4	0.0295084	0.0199357	0.0325315	0.0325595	0.0141879	0.0233404	0.057899	0.0512448	0.0454264	0.0501973	0.0474215	0.044328	0.0388671	0.0825154	0.0862002	0.0616315	0.0484588	0.0425273	0.0588733	0.0584596	0.0719272	0.0546581	0.0786038	0.078493	0.0324817	0.0133607	0.0351557	0.00780672	0.0130351	0.0161824	0.0632045	0.121794	0.077709	0.0871699	0.0517663	0.071318
Butanoic acid, 3-hexenyl ester, (Z)-	Ester	C10H18O2	16491-36-4	0.013994	0.0171792	0.0205304	0.0165982	0.013512	0.0179611	0.0260689	0.0193425	0.0172886	0.0171047	0.0190155	0.0182684	0.0233485	0.0376507	0.030168	0.0239762	0.0339268	0.0232551	0.0340998	0.0383644	0.039194	0.0253471	0.0496867	0.0525568	0.0231541	0.0196682	0.034995	0.0204208	0.0227821	0.0181096	0.048357	0.054131	0.0439992	0.0524417	0.0379436	0.0448239
Butanoic acid, 3-methyl-, 2-methylbutyl ester	Ester	C10H20O2	2445-77-4	0.268575	0.26002	0.711257	0.271568	0.616396	0.541506	0.665089	0.500746	0.563068	0.425652	0.316473	0.432709	0.51278	1.07687	1.23639	0.91567	0.519306	0.604762	0.361284	0.306572	0.384802	0.332396	0.568593	0.63518	0.302922	0.201235	0.224883	0.189105	0.232406	0.160563	0.550009	0.759555	0.481513	0.671598	0.475665	0.538703
Butanoic acid, 3-methyl-, 2-phenylethyl ester	Ester	C13H18O2	140-26-1	0.0295084	0.0199357	0.0325315	0.0325595	0.0141879	0.0233404	0.057899	0.0512448	0.0454264	0.0501973	0.0474215	0.044328	0.0388671	0.0825154	0.0862002	0.0616315	0.0484588	0.0425273	0.0588733	0.0584596	0.0719272	0.0546581	0.0786038	0.078493	0.0324817	0.0133607	0.0351557	0.00780672	0.0130351	0.0161824	0.0632045	0.121794	0.077709	0.0871699	0.0517663	0.071318
Butanoic acid, butyl ester	Ester	C8H16O2	109-21-7	0.0359048	0.0355838	0.0619337	0.038258	0.06357	0.0485768	0.0304157	0.0219701	0.0304664	0.0312473	0.0198778	0.0229321	0.0519072	0.0455123	0.0272638	0.0405428	0.0454985	0.0509749	0.0298927	0.0327177	0.0289893	0.0307433	0.0343969	0.0387966	0.0378378	0.039706	0.0613862	0.0383168	0.0381475	0.0426306	0.0410873	0.0564315	0.0274694	0.0430593	0.0434957	0.0495091
Carbamic acid, 2-chloroethyl ester	Ester	C3H6ClNO2	2114-18-3	0.0144926	0.399914	0.0181228	0.0157754	0.0157445	0.0140928	0.0186679	0.0123644	0.0141195	0.351089	0.286655	0.0141208	0.373024	0.771653	0.800711	0.646951	0.367483	0.346497	0.428007	0.390665	0.453228	0.294806	0.573134	0.637013	0.304453	0.223548	0.375753	0.192792	0.214406	0.25651	0.4376	0.0163525	0.0165006	0.0187829	0.0132823	0.445541
Citronellyl isobutyrate	Ester	C14H26O2	97-89-2	0.203706	0.136207	0.231119	0.228488	0.1302	0.212922	0.409536	0.359781	0.319806	0.351608	0.304747	0.265886	0.20225	0.491968	0.630004	0.422006	0.290415	0.215356	0.394325	0.383908	0.492962	0.396346	0.537246	0.540519	0.213742	0.0840788	0.269691	0.0973345	0.0939656	0.112452	0.383782	0.8371	0.57265	0.622598	0.353386	0.499462
Ethyl 2-hexenoate, trans-	Ester	C8H14O2	27829-72-7	0.0921403	0.0323288	0.0850439	0.0410442	0.0703877	0.0572219	0.0448414	0.0338909	0.038734	0.0459625	0.0388977	0.029764	0.0570769	0.0587287	0.0594902	0.0756926	0.035649	0.0411456	0.0227993	0.0275804	0.0249701	0.0261396	0.0288595	0.0320557	0.0284525	0.0288716	0.0475778	0.029939	0.0280314	0.0337566	0.0375079	0.0525856	0.0548644	0.0479186	0.0458277	0.0409949
Formic acid, octyl ester	Ester	C9H18O2	112-32-3	0.0617772	0.0770215	0.101738	0.0977454	0.0629644	0.0678891	0.103006	0.0848337	0.0908378	0.0745423	0.0470678	0.0801768	0.0559096	0.116222	0.104348	0.0709687	0.0419108	0.0586687	0.0328696	0.0324535	0.0524229	0.0385368	0.0550504	0.0592527	0.117716	0.032476	0.132691	0.0262415	0.024721	0.0407557	0.0389067	0.0406524	0.142637	0.0383735	0.046331	0.0380876
Furfuryl heptanoate	Ester	C12H18O3	39481-28-2	0.0858417	0.0613323	0.112951	0.0945576	0.0545942	0.0901306	0.202126	0.17444	0.154495	0.16949	0.137077	0.129367	0.114285	0.243092	0.306926	0.204924	0.140399	0.124618	0.195028	0.186613	0.240867	0.178806	0.255727	0.25882	0.0979629	0.0405473	0.131439	0.032054	0.0389053	0.0470155	0.182037	0.452583	0.323071	0.350262	0.158408	0.277768
Heptanoic acid, ethyl ester	Ester	C9H18O2	106-30-9	0.016068	0.0110358	0.0294497	0.0163341	0.0174481	0.023008	0.029239	0.0215106	0.0252599	0.0182086	0.0142263	0.0175115	0.0190837	0.0477345	0.0536902	0.0391236	0.0173585	0.023545	0.013917	0.0125164	0.0152623	0.0109953	0.0243382	0.027577	0.0157641	0.00828402	0.0156638	0.00472477	0.00529183	0.00706431	0.022461	0.0317475	0.0308868	0.0281857	0.0173452	0.0223059
Hexanoic acid, 2-methylbutyl ester	Ester	C11H22O2	2601-13-0	0.0806046	0.0548037	0.0902381	0.0873048	0.0767811	0.103293	0.151088	0.130389	0.132129	0.123032	0.0733686	0.0952819	0.144921	0.287947	0.276788	0.221574	0.146088	0.150898	0.163332	0.172783	0.191503	0.150436	0.26816	0.263279	0.134203	0.0561078	0.148184	0.0427545	0.0533198	0.0518553	0.207903	0.268507	0.2735	0.21848	0.160627	0.226607
Hexanoic acid, 3-methyl-2-butenyl ester	Ester	C11H20O2	76649-22-4	0.0567772	0.0681253	0.125742	0.0623818	0.0681219	0.109868	0.09727	0.0787464	0.0887181	0.0636805	0.06401	0.0657392	0.0642858	0.136918	0.128441	0.093777	0.0642526	0.0705796	0.0396834	0.0555924	0.0574386	0.0534003	0.0585266	0.0566943	0.0556208	0.0309182	0.0733028	0.0288632	0.0301256	0.0364408	0.0747989	0.155097	0.124171	0.122884	0.0512989	0.0768506
Hexanoic acid, butyl ester	Ester	C10H20O2	626-82-4	0.0475898	0.0563795	0.0979952	0.0506372	0.0522302	0.0732774	0.0606837	0.0617025	0.0529829	0.0658214	0.0510027	0.0561363	0.0613481	0.0994476	0.090567	0.0797747	0.0553514	0.0589933	0.0567862	0.0610672	0.0710167	0.0563675	0.0843428	0.0850947	0.0581195	0.0384708	0.0648616	0.0445922	0.0491683	0.0488119	0.0860491	0.140695	0.11563	0.10402	0.0671444	0.0887391
Hexanoic acid, cyclopentyl ester	Ester	C11H20O2	5413-59-2	0.0212372	0.0192855	0.055141	0.0231287	0.0309448	0.039177	0.0363503	0.0248154	0.0344545	0.0315396	0.018428	0.0194443	0.0225417	0.0507413	0.0597055	0.0445998	0.0179787	0.0330317	0.0158473	0.0257126	0.0179425	0.0159337	0.0180702	0.0223397	0.0151361	0.0121033	0.0291585	0.0120648	0.0110873	0.0164829	0.0305139	0.0626335	0.044055	0.0485376	0.0225414	0.0402797
Isobornyl formate	Ester	C11H18O2	1200-67-5	1.74867	1.38717	2.72104	1.89544	1.60359	2.10495	3.31068	2.70322	2.75811	2.50286	1.80647	2.36087	2.40029	4.75245	5.68437	3.74332	2.54663	2.65083	3.07286	3.2785	3.53915	2.77384	5.20464	5.14917	1.61182	1.25884	2.07898	1.01369	1.26076	1.52811	4.00029	6.04126	5.26486	4.86831	2.93829	3.96871
Isobutyl isovalerate	Ester	C9H18O2	589-59-3	0.028886	0.0269738	0.0695747	0.0364014	0.0626761	0.0497346	0.0383135	0.0298301	0.0340484	0.0252611	0.0211926	0.0250743	0.0325871	0.049742	0.040694	0.0422087	0.0308261	0.0321731	0.0201979	0.0237146	0.0208481	0.0215241	0.0254557	0.0269919	0.0222294	0.0237455	0.0397634	0.0230233	0.0238763	0.0279819	0.0283588	0.0388878	0.0353066	0.0334058	0.0260671	0.0311695
Isopentyl hexanoate	Ester	C11H22O2	2198-61-0	0.200881	0.107697	0.310894	0.223117	0.177872	0.241505	0.363836	0.314708	0.318196	0.289542	0.148132	0.271857	0.246517	0.543959	0.645353	0.425853	0.339933	0.354535	0.395234	0.423913	0.464274	0.361399	0.576337	0.660189	0.318252	0.157834	0.195842	0.116543	0.154509	0.134234	0.447573	0.730037	0.686882	0.581631	0.381978	0.441144
L-Norleucine, methyl ester	Ester	C7H15NO2	21754-55-2	0.0101657	0.0098321	0.0275993	0.0116905	0.0145092	0.0187526	0.0146177	0.0108602	0.0126848	0.0105076	0.00901644	0.01004	0.0121907	0.0213256	0.0248609	0.0189815	0.0127377	0.0149772	0.00699213	0.00867619	0.00735867	0.008003	0.00861916	0.0101199	0.00847556	0.00873319	0.014617	0.0085234	0.00869526	0.00951425	0.0162871	0.0220435	0.0293642	0.0283524	0.0113661	0.0230155
Methyl 6-chloronicotinate	Ester	C7H6ClNO2	73781-91-6	0.169374	0.14425	0.231513	0.180977	0.172287	0.177855	0.276895	0.26098	0.266464	0.241029	0.173678	0.224756	0.237494	0.455344	0.479577	0.363188	0.2436	0.25246	0.281171	0.294409	0.318895	0.254016	0.413608	0.462715	0.208849	0.10736	0.221376	0.092102	0.101919	0.102117	0.355225	0.479962	0.46175	0.388454	0.277921	0.370339
Methyl salicylate	Ester	C8H8O3	119-36-8	0.068343	0.173573	0.167819	0.202909	0.64894	0.0519237	0.0824844	0.0567093	0.0823358	0.0814387	0.0347956	0.0346292	0.0119571	0.0239571	0.0224418	0.0227104	0.0129351	0.0101679	0.0220501	0.0178033	0.0289641	0.0255996	0.029627	0.0465318	0.0564886	0.0162294	0.0285641	0.00772249	0.0175216	0.0101753	0.0396003	0.022273	0.048822	0.0471801	0.0409396	0.0850206
Pentanoic acid, 1-ethenyl-1,5-dimethyl-4-hexenyl ester	Ester	C15H26O2	10471-96-2	0.0127179	0.0124568	0.0247485	0.0166652	0.0105555	0.0204063	0.010443	0.0419006	0.0622699	0.0109025	0.00418796	0.0158055	0.0225157	0.129474	0.0492554	0.0568937	0.0426492	0.0241471	0.0408002	0.0359329	0.0358899	0.0100374	0.0435067	0.0570979	0.0254295	0.0265746	0.0399	0.0177832	0.0211252	0.0361039	0.0290674	0.0492753	0.0417977	0.0294059	0.0579823	0.0283187
Propanoic acid, hexyl ester	Ester	C9H18O2	2445-76-3	0.188906	0.143209	0.358198	0.188346	0.210892	0.279155	0.365575	0.266246	0.298706	0.210484	0.156019	0.222439	0.237944	0.578348	0.677502	0.492763	0.249452	0.308355	0.189278	0.182421	0.201511	0.167984	0.307736	0.346455	0.196114	0.102231	0.212397	0.085616	0.0925176	0.0949723	0.28368	0.387225	0.364124	0.353122	0.204575	0.272189
n-Capric acid isobutyl ester	Ester	C14H28O2	30673-38-2	0.00635835	0.00557062	0.0128557	0.0073453	0.00646544	0.00953488	0.0130041	0.0403601	0.0127192	0.0157421	0.0100847	0.0107177	0.0108555	0.0230676	0.0214648	0.0200006	0.0151834	0.0272525	0.0112389	0.0119157	0.0196829	0.0151415	0.0137948	0.0121854	0.00882974	0.0103053	0.00827071	0.00585201	0.00723541	0.0136922	0.0181832	0.0396003	0.0273599	0.0346112	0.0142193	0.0245289
n-Heptyl hexanoate	Ester	C13H26O2	6976-72-3	0.114708	0.0746921	0.135757	0.11946	0.0722804	0.115483	0.247424	0.217742	0.194222	0.210255	0.184125	0.16364	0.151952	0.357947	0.389166	0.256867	0.185673	0.173871	0.235592	0.224304	0.291521	0.221478	0.320347	0.324167	0.120209	0.0474237	0.161071	0.0380283	0.0557299	0.0723933	0.241711	0.498639	0.380728	0.4228	0.198765	0.31083
