# Supplementary material for: Comparative Analysis of Metabolome and Transcriptome in Different Tissue Sites of Aquilaria sinensis (Lour.) Gilg
Source: Molecules. 2024 Feb 29;29(5):1075. doi: 10.3390/molecules29051075 (PMC10935121; doi:10.3390/molecules29051075)
Supplement: Supplementary file 1 [file molecules-29-01075-s001.zip › Supplementary Table S2.xlsx]

## Sheet: Sheet1
Table S2. Ten subclasses of different volatile compounds in K-means cluster diagram.
SubClass	Compounds	Formula	CAS	Compound type
1	1-OctanAmine,N-methyl-	C9H21N	2439-54-5	Amine
1	1-Nonen-4-ol	C9H18O	35192-73-5	Alcohol
1	Benzenemethanol, 4-methyl-	C8H10O	589-18-4	Alcohol
1	Benzene, (2-methoxyethyl)-	C9H12O	3558-60-9	Aromatics
1	Acetonitrile, 2,2'-iminobis-	C4H5N3	628-87-5	Nitrogen compounds
1	Hexathiane	S6	13798-23-7	Sulfur compounds
1	2-Isopropyl-5-methylhex-2-enal	C10H18O	35158-25-9	Aldehyde
1	6-Nonenal, (Z)-	C9H16O	2277-19-2	Aldehyde
1	2-Propenoic Acid, 3-phenyl-	C9H8O2	621-82-9	Acid
1	Furan, 3-(4-methyl-3-pentenyl)-	C10H14O	539-52-6	Terpenoids
1	Thujone	C10H16O	546-80-5	Terpenoids
1	trans-Geranic acid methyl ester	C11H18O2	1189-09-9	Terpenoids
1	Decane, 2,3,5-trimethyl-	C13H28	62238-11-3	Hydrocarbons
1	3,5-Octadien-2-one	C8H12O	38284-27-4	Ketone
1	3,5-Octadien-2-one, (E,E)-	C8H12O	30086-02-3	Ketone
1	8-Nonen-2-one	C9H16O	5009-32-5	Ketone
1	1-ethenyl-2-Pyrrolidinone	C6H9NO	88-12-0	Heterocyclic compound
1	1H-Pyrazole-1-carboximidamide, 3,5-dimethyl-	C6H10N4	22906-75-8	Heterocyclic compound
1	2(1H)-Pyridinone	C5H5NO	142-08-5	Heterocyclic compound
1	2-Hydroxymethylbenzimidazole	C8H8N2O	22128-99-0	Heterocyclic compound
1	2-Thiophenemethanethiol	C5H6S2	6258-63-5	Heterocyclic compound
1	5-Ethylhydantoin	C5H8N2O2	15414-82-1	Heterocyclic compound
1	Ethanone, 1-(2-thienyl)-	C6H6OS	88-15-3	Heterocyclic compound
1	2,4-Hexadienoic acid, ethyl ester, (2E,4E)-	C8H12O2	2396-84-1	Ester
1	2,6-Octadienoic acid, 3,7-dimethyl-, methyl ester	C11H18O2	2349-14-6	Ester
1	3-Hexen-1-ol, propanoate, (Z)-	C9H16O2	33467-74-2	Ester
1	3-Methylheptyl acetate	C10H20O2	72218-58-7	Ester
1	Butanoic acid, 1,1-dimethyl-2-phenylethyl ester	C14H20O2	10094-34-5	Ester
1	Butanoic acid, 3-methyl-, 2-methylbutyl ester	C10H20O2	2445-77-4	Ester
1	Heptanoic acid, ethyl ester	C9H18O2	106-30-9	Ester
1	Propanoic acid, hexyl ester	C9H18O2	2445-76-3	Ester
2	Benzamide	C7H7NO	55-21-0	Amine
2	Cyclohexanol, 1-ethenyl-	C8H14O	1940-19-8	Alcohol
2	3-MethoxycinnamAldehyde	C10H10O2	56578-36-0	Aldehyde
2	2-Hexenoic Acid, (E)-	C6H10O2	13419-69-7	Acid
2	(S,1Z,6Z)-8-Isopropyl-1-methyl-5-methylenecyclodeca-1,6-diene	C15H24	317819-80-0	Terpenoids
2	Benzene, 1-(1,5-dimethylhexyl)-4-methyl-	C15H24	1461-02-5	Terpenoids
2	Kessane	C15H26O	3321-66-2	Terpenoids
2	2,5-Octanedione	C8H14O2	3214-41-3	Ketone
2	1,2,4-Triazine-3,5(2H,4H)-dione	C3H3N3O2	461-89-2	Heterocyclic compound
2	2-Propenoic acid, 2-methoxyethyl ester	C6H10O3	3121-61-7	Ester
2	2-Propenoic acid, pentyl ester	C8H14O2	2998-23-4	Ester
2	Butanoic acid, butyl ester	C8H16O2	109-21-7	Ester
3	2-Nonen-1-ol, (E)-	C9H18O	31502-14-4	Alcohol
3	Camphor	C10H16O	76-22-2	Terpenoids
3	2-(2-Acetoxy-1-propyl)furan, (S)	C9H12O3	60830-70-8	Heterocyclic compound
3	2-Piperidinimine	C5H10N2	22780-54-7	Heterocyclic compound
3	Thiophene, 2-pentyl-	C9H14S	4861-58-9	Heterocyclic compound
3	Acetic acid, phenyl ester	C8H8O2	122-79-2	Ester
3	Carbamic acid, 2-chloroethyl ester	C3H6ClNO2	2114-18-3	Ester
4	1-Octanol	C8H18O	111-87-5	Alcohol
4	3-Hexyne-2,5-diol	C6H10O2	3031-66-1	Alcohol
4	5,9-Undecadien-2-ol, 6,10-dimethyl-	C13H24O	53837-34-6	Alcohol
4	trans-2-Dodecen-1-ol	C12H24O	69064-37-5	Alcohol
4	Benzene, 1,2,3-trimethyl-	C9H12	526-73-8	Aromatics
4	Benzene, [1-[[1-(1-methylethyl)-3-butenyl]oxy]ethyl]-, [S-(R*,R*)]-	C15H22O	98088-51-8	Aromatics
4	Styrene	C8H8	100-42-5	Aromatics
4	(2E)-2-(Acetylhydrazono)propanoic acid	C5H8N2O3	64096-81-7	Acid
4	Undecylenic Acid	C11H20O2	112-38-9	Acid
4	trans-Cinnamic Acid	C9H8O2	140-10-3	Acid
4	(1R,4R,4aS,8aR)-4,7-Dimethyl-1-(prop-1-en-2-yl)-1,2,3,4,4a,5,6,8a-octahydronaphthalene	C15H24	92692-39-2	Terpenoids
4	(4aS-cis)-2,4a,5,6,7,8,9,9a-octahydro-3,5,5-trimethyl-9-methylene-1H-Benzocycloheptene	C15H24	3853-83-6	Terpenoids
4	(E)-.beta.-Famesene	C15H24	18794-84-8	Terpenoids
4	1,5-Heptadien-4-one, 3,3,6-trimethyl-	C10H16O	546-49-6	Terpenoids
4	1,6,10-Dodecatriene, 7,11-dimethyl-3-methylene-	C15H24	77129-48-7	Terpenoids
4	5,9-Undecadien-2-one, 6,10-dimethyl-	C13H22O	689-67-8	Terpenoids
4	Cyclohexanone, 5-methyl-2-(1-methylethyl)-, cis-	C10H18O	491-07-6	Terpenoids
4	Cyclohexanone, 5-methyl-2-(1-methylethyl)-, trans-	C10H18O	89-80-5	Terpenoids
4	Geranyl acetate	C12H20O2	105-87-3	Terpenoids
4	Iridomyrmecin	C10H16O2	485-43-8	Terpenoids
4	2,6,10-Trimethyltridecane	C16H34	3891-99-4	Hydrocarbons
4	2-Tetradecene, (E)-	C14H28	35953-54-9	Hydrocarbons
4	Heptadecane	C17H36	629-78-7	Hydrocarbons
4	Heptadecane, 7-methyl-	C18H38	20959-33-5	Hydrocarbons
4	Hexadecane	C16H34	544-76-3	Hydrocarbons
4	Hexadecane, 2-methyl-	C17H36	1560-92-5	Hydrocarbons
4	Hexadecane, 4-methyl-	C17H36	25117-26-4	Hydrocarbons
4	Pentadecane, 2,6,10-trimethyl-	C18H38	3892-00-0	Hydrocarbons
4	Tetradecane	C14H30	629-59-4	Hydrocarbons
4	Tetradecane, 2-methyl-	C15H32	1560-95-8	Hydrocarbons
4	Tetradecane, 4-methyl-	C15H32	25117-24-2	Hydrocarbons
4	Tridecane	C13H28	629-50-5	Hydrocarbons
4	1(2H)-Naphthalenone, octahydro-4-hydroxy-, trans-	C10H16O2	21766-50-7	Ketone
4	5,9-Undecadien-2-one, 6,10-dimethyl-, (E)-	C13H22O	3796-70-1	Ketone
4	Ethanone, 1-(3-hydroxyphenyl)-	C8H8O2	121-71-1	Ketone
4	2(3H)-Furanone, 5-butyldihydro-4-methyl-	C9H16O2	39212-23-2	Heterocyclic compound
4	.delta.-Dodecalactone	C12H22O2	713-95-1	Ester
4	Benzyl angelate	C12H14O2	37526-87-7	Ester
4	Butanoic acid, 1,7,7-trimethylbicyclo[2.2.1]hept-2-yl ester, endo-	C14H24O2	13109-70-1	Ester
4	Hexanoic acid, butyl ester	C10H20O2	626-82-4	Ester
4	n-Capric acid isobutyl ester	C14H28O2	30673-38-2	Ester
5	(6Z)-Nonen-1-ol	C9H18O	35854-86-5	Alcohol
5	1-Cyclopentene-1-methanol, 2-methyl-5-(1-methylethyl)-	C10H18O	80113-82-2	Alcohol
5	1-Dodecanol	C12H26O	112-53-8	Alcohol
5	1-Nonanol	C9H20O	143-08-8	Alcohol
5	3-Nonen-1-ol, (Z)-	C9H18O	10340-23-5	Alcohol
5	3-Phenylpropanol	C9H12O	122-97-4	Alcohol
5	Benzenemethanol, .alpha.-2-propenyl-	C10H12O	936-58-3	Alcohol
5	1,8-Ethylenenaphthalene	C12H10	83-32-9	Aromatics
5	1,3-Benzenediol, 4,5-dimethyl-	C8H10O2	527-55-9	Phenol
5	Catechol	C6H6O2	120-80-9	Phenol
5	Phenol, 2,3,6-trimethyl-	C9H12O	2416-94-6	Phenol
5	Phenol, 4-(3-hydroxy-1-propenyl)-2-methoxy-	C10H12O3	458-35-5	Phenol
5	Phenol, 4-methyl-2-nitro-	C7H7NO3	119-33-5	Phenol
5	2-Nonenenitrile	C9H15N	29127-83-1	Nitrogen compounds
5	Dodecanenitrile	C12H23N	2437-25-4	Nitrogen compounds
5	2-Methylbutanoic anhydride	C10H18O3	1468-39-9	Others
5	2-Decenal, (Z)-	C10H18O	2497-25-8	Aldehyde
5	3-(4-Hydroxyphenyl)propanal	C9H10O2	20238-83-9	Aldehyde
5	BenzAldehyde, 3,4-dimethoxy-	C9H10O3	120-14-9	Aldehyde
5	Lilac Aldehyde C	C10H16O2	53447-48-6	Aldehyde
5	Lilac Aldehyde D	C10H16O2	53447-47-5	Aldehyde
5	OxiranecarboxAldehyde, 3-methyl-3-(4-methyl-3-pentenyl)-	C10H16O2	16996-12-6	Aldehyde
5	9-Oxononanoic Acid	C9H16O3	2553-17-5	Acid
5	Octanoic Acid	C8H16O2	124-07-2	Acid
5	Propanoic Acid, 2-oxo-	C3H4O3	127-17-3	Acid
5	(-)-Carvone	C10H14O	6485-40-1	Terpenoids
5	(1.alpha.,2.beta.,5.alpha.)-2-methyl-5-(1-methylethenyl)-Cyclohexanol	C10H18O	38049-26-2	Terpenoids
5	(1S,2E,6E,10R)-3,7,11,11-Tetramethylbicyclo[8.1.0]undeca-2,6-diene	C15H24	24703-35-3	Terpenoids
5	(1S,5S,6R)-6-Methyl-2-methylene-6-(4-methylpent-3-en-1-yl)bicyclo[3.1.1]heptane	C15H24	15438-94-5	Terpenoids
5	(2R,3R,6S)-6-Isopropyl-3-methyl-2-(prop-1-en-2-yl)-3-vinylcyclohexanone	C15H24O	39020-72-9	Terpenoids
5	(2S,3S,6S)-6-Isopropyl-3-methyl-2-(prop-1-en-2-yl)-3-vinylcyclohexanone	C15H24O	21698-44-2	Terpenoids
5	(4R,4aS,6S)-4,4a-Dimethyl-6-(prop-1-en-2-yl)-1,2,3,4,4a,5,6,7-octahydronaphthalene	C15H24	823810-22-6	Terpenoids
5	.beta.-Guaiene	C15H24	88-84-6	Terpenoids
5	1,3-Cyclohexadiene, 5-(1,5-dimethyl-4-hexenyl)-2-methyl-, [S-(R*,S*)]-	C15H24	495-60-3	Terpenoids
5	1,3-Cyclohexadiene-1-carboxaldehyde, 2,6,6-trimethyl-	C10H14O	116-26-7	Terpenoids
5	1-Cyclohexene-1-carboxylic acid, 4-(1-methylethenyl)-	C10H14O2	7694-45-3	Terpenoids
5	1H-Benzocycloheptene, 2,4a,5,6,7,8-hexahydro-3,5,5,9-tetramethyl-, (R)-	C15H24	1461-03-6	Terpenoids
5	2,4-Cycloheptadien-1-one, 2,6,6-trimethyl-	C10H14O	503-93-5	Terpenoids
5	3,6-Octadien-1-ol, 3,7-dimethyl-, (Z)-	C10H18O	5944-20-7	Terpenoids
5	6-Octen-1-ol, 7-methyl-3-methylene-	C10H18O	13066-51-8	Terpenoids
5	Bicyclo[3.1.1]heptan-3-ol, 2,6,6-trimethyl-, (1.alpha.,2.beta.,3.alpha.,5.alpha.)-	C10H18O	27779-29-9	Terpenoids
5	Bicyclo[7.2.0]undecane, 10,10-dimethyl-2,6-bis(methylene)-, [1S-(1R*,9S*)]-	C15H24	136296-38-3	Terpenoids
5	Bicyclosesquiphellandrene	C15H24	54324-03-7	Terpenoids
5	Carvone	C10H14O	99-49-0	Terpenoids
5	D-Verbenone	C10H14O	18309-32-5	Terpenoids
5	Isopinocarveol	C10H16O	6712-79-4	Terpenoids
5	Naphthalene, decahydro-4a-methyl-1-methylene-7-(1-methylethenyl)-, [4aR-(4a.alpha.,7.alpha.,8a.beta.)]-	C15H24	17066-67-0	Terpenoids
5	cis-Dihydrocarvone	C10H16O	3792-53-8	Terpenoids
5	1,5-Cycloundecadiene, 8,8-dimethyl-9-methylene-	C14H22	62338-54-9	Hydrocarbons
5	2,6-Octadiene, 2,6-dimethyl-	C10H18	2792-39-4	Hydrocarbons
5	Tetradecane, 2,6,10-trimethyl-	C17H36	14905-56-7	Hydrocarbons
5	Undecane, 3,4-dimethyl-	C13H28	17312-78-6	Hydrocarbons
5	6,7-Dodecanedione	C12H22O2	13757-90-9	Ketone
5	Apocynin	C9H10O3	498-02-2	Ketone
5	(3R,6S)-2,2,6-Trimethyl-6-vinyltetrahydro-2H-pyran-3-ol	C10H18O2	39028-58-5	Heterocyclic compound
5	1-Pentanol, 5-[(tetrahydro-2H-pyran-2-yl)oxy]-	C10H20O3	76102-74-4	Heterocyclic compound
5	1H-Pyrrole-2,5-dione, 3-ethyl-4-methyl-	C7H9NO2	20189-42-8	Heterocyclic compound
5	2(5H)-Furanone, 5-ethyl-3-hydroxy-4-methyl-	C7H10O3	698-10-2	Heterocyclic compound
5	2,5-Pyrrolidinedione, 1-ethyl-	C6H9NO2	2314-78-5	Heterocyclic compound
5	2-Ethoxy-3-methylpyrazine	C7H10N2O	32737-14-7	Heterocyclic compound
5	2-Furanpropanoic acid, ethyl ester	C9H12O3	10031-90-0	Heterocyclic compound
5	2-Hexanoylfuran	C10H14O2	14360-50-0	Heterocyclic compound
5	2H-1-Benzopyran-2-one, 3-methyl-	C10H8O2	2445-82-1	Heterocyclic compound
5	2H-Indol-2-one, 1,3-dihydro-	C8H7NO	59-48-3	Heterocyclic compound
5	2H-Pyran-3-ol, 6-ethenyltetrahydro-2,2,6-trimethyl-	C10H18O2	14049-11-7	Heterocyclic compound
5	Arecoline	C8H13NO2	63-75-2	Heterocyclic compound
5	Ethanone, 1-(1H-pyrrol-2-yl)-	C6H7NO	1072-83-9	Heterocyclic compound
5	Ethanone, 1-(2-methyl-1,3-dithiolan-2-yl)-	C6H10OS2	33266-07-8	Heterocyclic compound
5	Furo[3,4-c]pyridin-1(3H)-one, 7-hydroxy-6-methyl-	C8H7NO3	4753-19-9	Heterocyclic compound
5	Pyrazinamide	C5H5N3O	98-96-4	Heterocyclic compound
5	Tropinone	C8H13NO	532-24-1	Heterocyclic compound
5	2,4-Decadienoic acid, ethyl ester, (E,Z)-	C12H20O2	3025-30-7	Ester
5	2-Butenoic acid, 3-hexenyl ester, (E,Z)-	C10H16O2	65405-80-3	Ester
5	2-Octenoic acid, ethyl ester	C10H18O2	2351-90-8	Ester
5	2-Phenoxyethyl isobutyrate	C12H16O3	103-60-6	Ester
5	3-Octen-1-ol, acetate, (Z)-	C10H18O2	69668-83-3	Ester
5	Benzeneacetic acid, ethyl ester	C10H12O2	101-97-3	Ester
5	Benzyl tiglate	C12H14O2	37526-88-8	Ester
5	Bicyclo[3.1.1]hept-2-en-6-ol, 2,7,7-trimethyl-, acetate, [1S-(1.alpha.,5.alpha.,6.beta.)]-	C12H18O2	50764-55-1	Ester
5	Butanoic acid, 2-methyl-, 2-phenylethyl ester	C13H18O2	24817-51-4	Ester
5	Butanoic acid, 3-hexenyl ester, (Z)-	C10H18O2	16491-36-4	Ester
5	Butanoic acid, 3-methyl-, 2-phenylethyl ester	C13H18O2	140-26-1	Ester
5	Citronellyl isobutyrate	C14H26O2	97-89-2	Ester
5	Furfuryl heptanoate	C12H18O3	39481-28-2	Ester
5	Hexanoic acid, 2-methylbutyl ester	C11H22O2	2601-13-0	Ester
5	Isobornyl formate	C11H18O2	1200-67-5	Ester
5	Isopentyl hexanoate	C11H22O2	2198-61-0	Ester
5	Methyl 6-chloronicotinate	C7H6ClNO2	73781-91-6	Ester
5	n-Heptyl hexanoate	C13H26O2	6976-72-3	Ester
6	Benzene, 1,3-dimethyl-	C8H10	108-38-3	Aromatics
6	Benzene, 1-ethyl-3,5-dimethyl-	C10H14	934-74-7	Aromatics
6	Toluene	C7H8	108-88-3	Aromatics
6	o-Xylene	C8H10	95-47-6	Aromatics
6	p-Xylene	C8H10	106-42-3	Aromatics
6	Limonene	C10H16	138-86-3	Terpenoids
6	cis-.alpha.-Bergamotene	C15H24	18252-46-5	Terpenoids
6	β-Funebrene	C15H24	79120-98-2	Terpenoids
7	1-Hexanol, 4-methyl-	C7H16O	818-49-5	Alcohol
7	1-Octen-3-ol	C8H16O	3391-86-4	Alcohol
7	2-Furanmethanol	C5H6O2	98-00-0	Alcohol
7	3,4-Dimethoxytoluene	C9H12O2	494-99-5	Aromatics
7	Naphthalene, 1-methyl-	C11H10	90-12-0	Aromatics
7	Naphthalene, 2-methyl-	C11H10	91-57-6	Aromatics
7	p-Menth-2-en-7-ol, cis-	C10H18O	19898-86-3	Phenol
7	Cyclobutanecarboxylic acid chloride	C5H7ClO	5006-22-4	Halogenated hydrocarbons
7	(E)-2-Heptenal	C7H12O	18829-55-5	Aldehyde
7	(Z)-2-Heptenal	C7H12O	57266-86-1	Aldehyde
7	2-Hexenal	C6H10O	505-57-7	Aldehyde
7	2-Hexenal, (E)-	C6H10O	6728-26-3	Aldehyde
7	Butanal, 3,3-dimethyl-2-oxo-, hemihydrate	C6H10O2	77572-68-0	Aldehyde
7	Hexanal	C6H12O	66-25-1	Aldehyde
7	.alpha.-Ionone	C13H20O	127-41-3	Terpenoids
7	1,3-Cyclohexadiene, 1-methyl-4-(1-methylethyl)-	C10H16	99-86-5	Terpenoids
7	2-methyl-5-(1-methylethenyl)-Cyclohexanol	C10H18O	619-01-2	Terpenoids
7	Caryophyllene	C15H24	87-44-5	Terpenoids
7	Cyclohexanol, 1-methyl-4-(1-methylethylidene)-	C10H18O	586-81-2	Terpenoids
7	Ionone	C13H20O	8013-90-9	Terpenoids
7	trans-.alpha.-Bergamotene	C15H24	13474-59-4	Terpenoids
7	1,5-Heptadiene, 2,6-dimethyl-	C9H16	6709-39-3	Hydrocarbons
7	Decane	C10H22	124-18-5	Hydrocarbons
7	E-1-Methoxy-4-hexene	C7H14O	134777-60-9	Hydrocarbons
7	Hexane, 3-ethyl-2-methyl-	C9H20	16789-46-1	Hydrocarbons
7	Octane, 5-ethyl-2-methyl-	C11H24	62016-18-6	Hydrocarbons
7	3,4-Hexanedione, 2,2,5-trimethyl-	C9H16O2	20633-03-8	Ketone
7	4-Hexen-3-one	C6H10O	2497-21-4	Ketone
7	Acetylacetone	C5H8O2	123-54-6	Ketone
7	Cyclobutanone, 2,2,3-trimethyl-	C7H12O	1449-49-6	Ketone
7	5-Methyloxazolidine	C4H9NO	58328-22-6	Heterocyclic compound
7	Furan, 2-propyl-	C7H10O	4229-91-8	Heterocyclic compound
7	1-Butanol, 3-methyl-, formate	C6H12O2	110-45-2	Ester
7	2-Butenoic acid, 3-methyl-, methyl ester	C6H10O2	924-50-5	Ester
7	4-Penten-1-ol, propanoate	C8H14O2	30563-30-5	Ester
7	Acetic acid, heptyl ester	C9H18O2	112-06-1	Ester
7	Butanoic acid, 2-methyl-, 2-methylpropyl ester	C9H18O2	2445-67-2	Ester
7	Ethyl 2-hexenoate, trans-	C8H14O2	27829-72-7	Ester
7	Formic acid, octyl ester	C9H18O2	112-32-3	Ester
7	Isobutyl isovalerate	C9H18O2	589-59-3	Ester
7	Methyl salicylate	C8H8O3	119-36-8	Ester
8	BenzenAmine, N,N-dimethyl-	C8H11N	121-69-7	Amine
8	Butylated Hydroxytoluene	C15H24O	128-37-0	Aromatics
8	2-methoxy-Phenol	C7H8O2	90-05-1	Phenol
8	Propanoic acid, 3-(methylthio)-	C4H8O2S	646-01-5	Sulfur compounds
8	(Z,Z)-3,6-Nonadienal	C9H14O	21944-83-2	Aldehyde
8	4-Nonenal, (E)-	C9H16O	2277-16-9	Aldehyde
8	(1S,4S,4aR)-1-Isopropyl-4-methyl-7-methylene-1,2,3,4,4a,5,6,7-octahydronaphthalene	C15H24	157477-72-0	Terpenoids
8	(1S,4S,4aS)-1-Isopropyl-4,7-dimethyl-1,2,3,4,4a,5-hexahydronaphthalene	C15H24	267665-20-3	Terpenoids
8	1H-3a,7-Methanoazulene, octahydro-3,8,8-trimethyl-6-methylene-, [3R-(3.alpha.,3a.beta.,7.beta.,8a.alpha.)]-	C15H24	546-28-1	Terpenoids
8	7-Octen-4-ol, 2-methyl-6-methylene-, (S)-	C10H18O	35628-05-8	Terpenoids
8	Bicyclo[3.1.1]heptane, 6-methyl-2-methylene-6-(4-methyl-3-pentenyl)-, [1R-(1.alpha.,5.alpha.,6.beta.)]-	C15H24	55123-21-2	Terpenoids
8	Bicyclo[3.2.1]oct-2-ene, 3-methyl-4-methylene-	C10H14	49826-53-1	Terpenoids
8	Cyclohexene, 4-[(1E)-1,5-dimethyl-1,4-hexadien-1-yl]-1-methyl-	C15H24	25532-79-0	Terpenoids
8	Epizonarene	C15H24	41702-63-0	Terpenoids
8	1,5-Cyclooctadiene, 1,6-dimethyl-	C10H16	3760-13-2	Hydrocarbons
8	2,2'-Isopropylidenebis(5-methylfuran)	C13H16O2	59212-75-8	Heterocyclic compound
8	2H-Pyran-2-one, tetrahydro-6-methyl-	C6H10O2	823-22-3	Heterocyclic compound
8	3-Acetyl-2,5-dimethyl furan	C8H10O2	10599-70-9	Heterocyclic compound
8	Pyrazine, 2-methoxy-3-(1-methylethyl)-	C8H12N2O	25773-40-4	Heterocyclic compound
8	Pyrazine, tetramethyl-	C8H12N2	1124-11-4	Heterocyclic compound
9	Caprolactam	C6H11NO	105-60-2	Amine
9	1-Decanol	C10H22O	112-30-1	Alcohol
9	1-Hexanol, 3,5,5-trimethyl-	C9H20O	3452-97-9	Alcohol
9	1-Undecyn-4-ol	C11H20O	22127-86-2	Alcohol
9	2-Decen-1-ol, (E)-	C10H20O	18409-18-2	Alcohol
9	2-Hexanol	C6H14O	626-93-7	Alcohol
9	2-Octen-1-ol, (E)-	C8H16O	18409-17-1	Alcohol
9	6-Undecanol	C11H24O	23708-56-7	Alcohol
9	Benzenemethanol, .alpha.-methyl-	C8H10O	98-85-1	Alcohol
9	Benzene, 1,2,3,5-tetramethyl-	C10H14	527-53-7	Aromatics
9	Benzene, 1,2,4,5-tetramethyl-	C10H14	95-93-2	Aromatics
9	Benzene, 2-ethyl-1,4-dimethyl-	C10H14	1758-88-9	Aromatics
9	Benzene, (methylthio)-	C7H8S	100-68-5	Sulfur compounds
9	Nonane, 1-iodo-	C9H19I	4282-42-2	Halogenated hydrocarbons
9	2-methylprop-2-enoyl 2-methylprop-2-enoate	C8H10O3	760-93-0	Others
9	(E)-2-Octenal	C8H14O	2548-87-0	Aldehyde
9	cis-4-Decenal	C10H18O	21662-09-9	Aldehyde
9	2,6-Octadienal, 3,7-dimethyl-, (E)-	C10H16O	141-27-5	Terpenoids
9	Citral	C10H16O	5392-40-5	Terpenoids
9	Geraniol	C10H18O	106-24-1	Terpenoids
9	3,5-Dimethyldodecane	C14H30	107770-99-0	Hydrocarbons
9	Decane, 3-ethyl-3-methyl-	C13H28	17312-66-2	Hydrocarbons
9	Decane, 5-ethyl-5-methyl-	C13H28	17312-74-2	Hydrocarbons
9	Dodecane, 3-methyl-	C13H28	17312-57-1	Hydrocarbons
9	Dodecane, 4,6-dimethyl-	C14H30	61141-72-8	Hydrocarbons
9	Nonane, 2,6-dimethyl-	C11H24	17302-28-2	Hydrocarbons
9	Nonane, 5-methyl-5-propyl-	C13H28	17312-75-3	Hydrocarbons
9	Tridecane, 2-methyl-	C14H30	1560-96-9	Hydrocarbons
9	Undecane	C11H24	1120-21-4	Hydrocarbons
9	Undecane, 2,4-dimethyl-	C13H28	17312-80-0	Hydrocarbons
9	Undecane, 2,5-dimethyl-	C13H28	17301-22-3	Hydrocarbons
9	Undecane, 2,6-dimethyl-	C13H28	17301-23-4	Hydrocarbons
9	Undecane, 2,9-dimethyl-	C13H28	17301-26-7	Hydrocarbons
9	Undecane, 3,5-dimethyl-	C13H28	17312-81-1	Hydrocarbons
9	Undecane, 3,6-dimethyl-	C13H28	17301-28-9	Hydrocarbons
9	Undecane, 4,4-dimethyl-	C13H28	17312-68-4	Hydrocarbons
9	Undecane, 6-ethyl-	C13H28	17312-60-6	Hydrocarbons
9	2-Heptanone, 4,6-dimethyl-	C9H18O	19549-80-5	Ketone
9	Bicyclo[3.1.1]heptan-3-one, 2-hydroxy-2,6,6-trimethyl-	C10H16O2	10136-65-9	Ketone
9	Cyclopentanone, 2-(2-hexenyl)-	C11H18O	34687-46-2	Ketone
9	1,2,4,5-Tetrazine-3,6-diAmine	C2H4N6	19617-90-4	Heterocyclic compound
9	2(3H)-Furanone, 5-(acetyloxy)dihydro-5-methyl-	C7H10O4	57681-51-3	Heterocyclic compound
9	2-Isobutylthiazole	C7H11NS	18640-74-9	Heterocyclic compound
9	2-Methyl-1,3-dithiacyclopentane	C4H8S2	5616-51-3	Heterocyclic compound
9	5-Thiazoleethanol, 4-methyl-	C6H9NOS	137-00-8	Heterocyclic compound
9	2(3H)-Furanone, 5-ethyldihydro-	C6H10O2	695-06-7	Ester
9	4-Methylhexyl 3-methylbutanoate	C12H24O2	1215127-80-2	Ester
9	Hexanoic acid, 3-methyl-2-butenyl ester	C11H20O2	76649-22-4	Ester
9	Hexanoic acid, cyclopentyl ester	C11H20O2	5413-59-2	Ester
9	L-Norleucine, methyl ester	C7H15NO2	21754-55-2	Ester
10	Acetamide, N-(2-phenylethyl)-	C10H13NO	877-95-2	Amine
10	7-Octen-2-ol	C8H16O	39546-75-3	Alcohol
10	(3-Bromo-1-methylpropoxymethyl)benzene	C11H15BrO	51666-29-6	Aromatics
10	2-Naphthalenol	C10H8O	135-19-3	Phenol
10	Phenol, 3-nitro-	C6H5NO3	554-84-7	Phenol
10	2,6-Nonadienal, (E,E)-	C9H14O	17587-33-6	Aldehyde
10	2,6-Nonadienal, (E,Z)-	C9H14O	557-48-2	Aldehyde
10	AcetAldehyde, (3,3-dimethylcyclohexylidene)-, (Z)-	C10H16O	26532-24-1	Aldehyde
10	BenzeneacetAldehyde	C8H8O	122-78-1	Aldehyde
10	(1.alpha.,4a.beta.,8a.alpha.)-1,2,3,4,4a,5,6,8a-octahydro-7-methyl-4-methylene-1-(1-methylethyl)-Naphthalene	C15H24	39029-41-9	Terpenoids
10	(1R,5S)-1,8-Dimethyl-4-(propan-2-ylidene)spiro[4.5]dec-7-ene	C15H24	28400-12-6	Terpenoids
10	(1S,4aR,7R)-1,4a-Dimethyl-7-(prop-1-en-2-yl)-1,2,3,4,4a,5,6,7-octahydronaphthalene	C15H24	52026-55-8	Terpenoids
10	(5R,10R)-10-Methyl-6-methylene-2-(propan-2-ylidene)spiro[4.5]dec-7-ene	C15H22	28908-27-2	Terpenoids
10	.alpha.-Farnesene	C15H24	502-61-4	Terpenoids
10	.alpha.-Muurolene	C15H24	10208-80-7	Terpenoids
10	.beta.-Bisabolene	C15H24	495-61-4	Terpenoids
10	1,7-Octadiene, 2-methyl-6-methylene-	C10H16	1686-30-2	Terpenoids
10	1-methyl-4-(1,2,2-trimethylcyclopentyl)cyclohexa-1,3-diene	C15H24	29621-78-1	Terpenoids
10	2,6-Octadienal, 3,7-dimethyl-, (Z)-	C10H16O	106-26-3	Terpenoids
10	Benzene, 1-methyl-4-(1,2,2-trimethylcyclopentyl)-, (R)-	C15H22	16982-00-6	Terpenoids
10	Bicyclo[4.4.0]dec-1-ene, 2-isopropyl-5-methyl-9-methylene-	C15H24	150320-52-8	Terpenoids
10	Naphthalene, 1,2,3,4-tetrahydro-1,6-dimethyl-4-(1-methylethyl)-, (1S-cis)-	C15H22	483-77-2	Terpenoids
10	Valerena-4,7(11)-diene	C15H24	351222-66-7	Terpenoids
10	[1S-(1.alpha.,7.alpha.,8a.beta.)]-1,2,3,5,6,7,8,8a-octahydro-1,4-dimethyl-7-(1-methylethenyl)-Azulene	C15H24	3691-11-0	Terpenoids
10	7-Octylidenebicyclo[4.1.0]heptane	C15H26	82253-11-0	Hydrocarbons
10	Cyclohexanone, 2,2,6-trimethyl-	C9H16O	2408-37-9	Ketone
10	Cyclopentanone	C5H8O	120-92-3	Ketone
10	1H-Pyrrole-2,5-dione	C4H3NO2	541-59-3	Heterocyclic compound
10	2-Acetylpyrrolidine	C6H11NO	60026-20-2	Heterocyclic compound
10	Thiazole, 5-ethenyl-4-methyl-	C6H7NS	1759-28-0	Heterocyclic compound
10	Benzoic acid, 4-ethoxy-, ethyl ester	C11H14O3	23676-09-7	Ester
10	Pentanoic acid, 1-ethenyl-1,5-dimethyl-4-hexenyl ester	C15H26O2	10471-96-2	Ester
